# Supplementary material for: Significance of a Tumor Mutation Burden Gene Signature with Prognosis and Immune Feature of Gastric Cancer Patients
Source: Hindawi journal article supplement (doi:10.1155/2022/7684606), 2022-06-08

**A**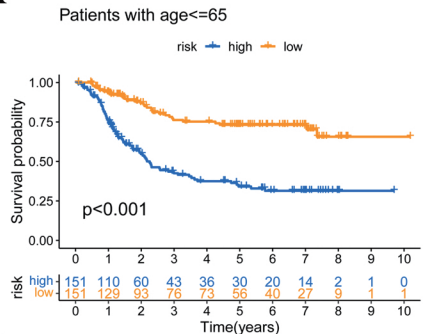**B**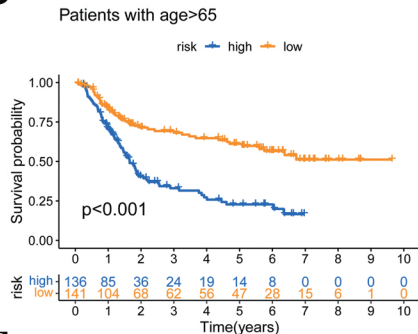**C**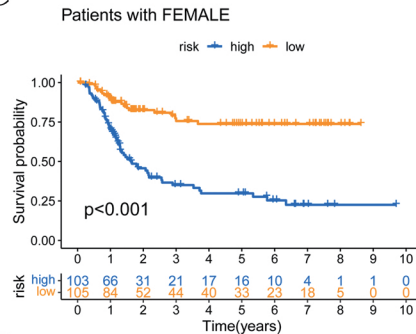**D**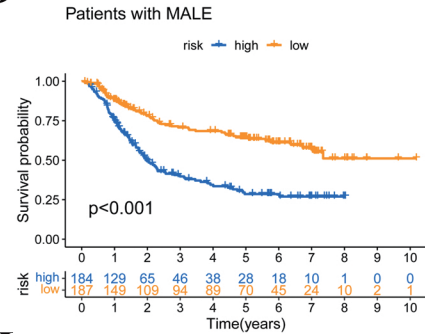**E**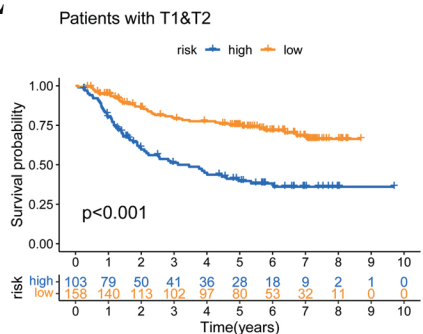**F**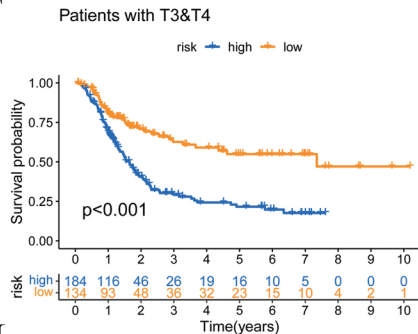**G**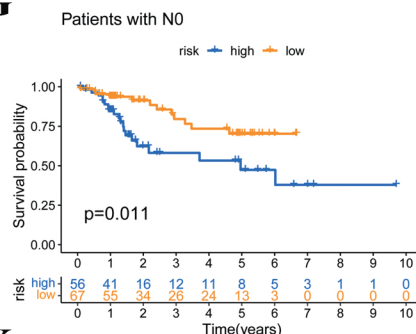**H**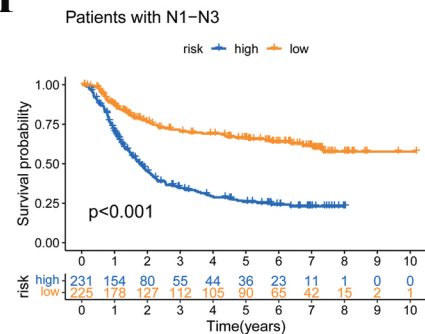**I**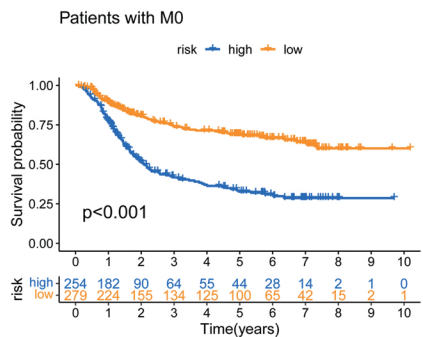**J**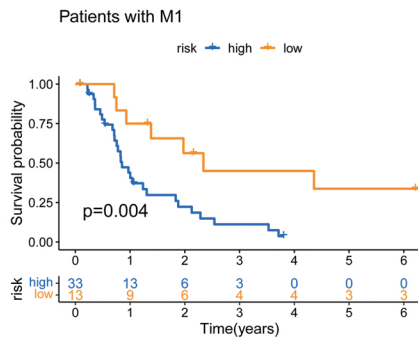**K**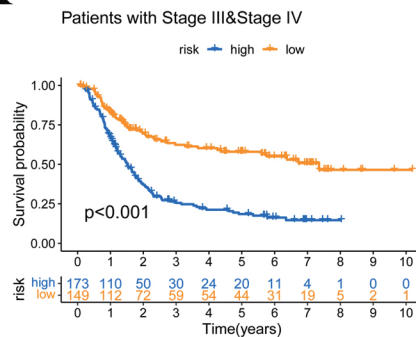**L**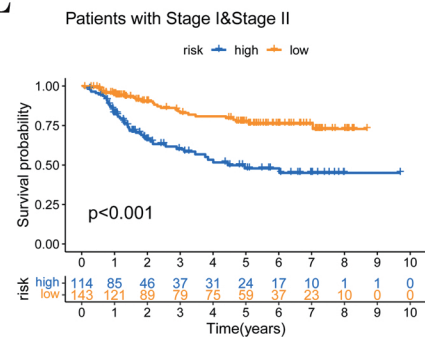

Supplement: f1 [file 7684606.f1.pdf]
