# Supplementary material for: Significance of a Tumor Mutation Burden Gene Signature with Prognosis and Immune Feature of Gastric Cancer Patients
Source: Int J Genomics. 2022 Jun 8;2022:7684606. doi: 10.1155/2022/7684606 (PMC9201710; doi:10.1155/2022/7684606)
Supplement: Supplementary 2 — Table 1: result of univariate Cox analysis. Supplementary Table 2: 29 optimal candidates acquired from LASSO regression analysis. Supplementary Table 3: result of multivariate Cox analysis. [file 7684606.f2.zip]

Archive with 3 entries (3 files):
- Supplementary table 1.txt
- Supplementary table 2.txt
- Supplementary table 3.txt
