# Supplementary material for: Significance of a Tumor Mutation Burden Gene Signature with Prognosis and Immune Feature of Gastric Cancer Patients
Source: Int J Genomics. 2022 Jun 8;2022:7684606. doi: 10.1155/2022/7684606 (PMC9201710; doi:10.1155/2022/7684606)
Supplement: Supplementary 2 — Table 1: result of univariate Cox analysis. Supplementary Table 2: 29 optimal candidates acquired from LASSO regression analysis. Supplementary Table 3: result of multivariate Cox analysis. [file 7684606.f2.zip › Supplementary table 1.txt]

id	HR	HR.95L	HR.95H	pvalue
SYNE1	1.491873166	1.227529865	1.813141666	5.82E-05
FAT4	1.398528009	1.157364679	1.689943219	0.000514061
FAT3	1.479817692	1.224277004	1.788696833	5.08E-05
HMCN1	1.42480031	1.2078099	1.68077437	2.67E-05
RYR2	1.356289933	1.154187879	1.593780714	0.00021409
ZFHX4	1.447907831	1.238311153	1.692980864	3.50E-06
PIK3CA	1.525405099	1.203856584	1.9328388	0.000472236
DMD	1.42385236	1.215127151	1.668430782	1.25E-05
PCDH10	1.579801453	1.305620591	1.911560409	2.58E-06
RYR3	1.365841377	1.168876551	1.595996316	8.71E-05
GLI3	1.429846079	1.203677657	1.698511056	4.70E-05
PXDN	1.40140018	1.208207694	1.625484156	8.23E-06
CMYA5	1.980627532	1.515247325	2.588940666	5.70E-07
RELN	1.35132486	1.131527926	1.613816889	0.00088644
NBEA	1.406073928	1.234288899	1.601767537	2.96E-07
ZFHX3	1.37057827	1.147612879	1.636862768	0.000501674
ANK2	1.334599467	1.143851342	1.557156661	0.000244516
ZBTB20	1.34901616	1.138781012	1.598063702	0.000533325
PEG3	1.438105828	1.257218344	1.645019247	1.17E-07
NAV3	2.013073085	1.581070277	2.563113927	1.37E-08
MACF1	1.432160197	1.180264194	1.737816703	0.000273485
SLITRK5	1.773641742	1.363784974	2.306672304	1.92E-05
PDZD2	1.60046397	1.300519151	1.969586466	8.93E-06
FBN1	1.371475037	1.191475452	1.578667672	1.08E-05
DCLK1	1.520014171	1.299881264	1.777426251	1.56E-07
NALCN	1.906461594	1.437507298	2.528401638	7.49E-06
SETBP1	1.336769754	1.185189204	1.507736798	2.28E-06
NRXN3	1.405238506	1.223829197	1.613538281	1.41E-06
MAP2	1.511182828	1.256007071	1.818201179	1.21E-05
ABCC9	1.356454635	1.179147528	1.560423215	1.99E-05
RIMS1	2.079999509	1.550767565	2.789842949	1.01E-06
VCAN	1.298678718	1.149809109	1.466822971	2.59E-05
DCHS1	1.406396458	1.175980233	1.681959392	0.00018726
MYH10	1.320761441	1.167488666	1.494156506	9.85E-06
LRP12	1.558467645	1.220156217	1.990582326	0.000380054
LAMA2	1.497428644	1.296459659	1.729550572	3.99E-08
SCN9A	1.561509423	1.269741687	1.920321041	2.41E-05
ASH1L	1.711093277	1.288060154	2.2730617	0.000209757
FMN2	1.735018787	1.310554948	2.296958395	0.000118478
HSPG2	1.327970089	1.132123112	1.557696807	0.000493391
FRY	1.465401138	1.169411695	1.836308381	0.000901985
FLNC	1.165233757	1.089664998	1.246043244	7.82E-06
THSD7B	1.550033019	1.298105883	1.850852377	1.28E-06
SLIT2	1.350248334	1.216478364	1.498728311	1.69E-08
ZNF208	2.015139061	1.4198879	2.859933827	8.76E-05
DYNC2H1	1.655864571	1.341878338	2.043320472	2.59E-06
ZNF521	1.34066907	1.147858199	1.565867245	0.000215067
PTPRD	1.393395164	1.164341786	1.66750872	0.000293978
FHOD3	1.350480828	1.158600299	1.574139475	0.000121669
F8	1.74617528	1.364237676	2.235041709	9.59E-06
CACNA1C	1.276640215	1.109893687	1.468438156	0.00062627
SCN11A	4.246049492	2.524495912	7.14159853	5.02E-08
SVEP1	1.306199795	1.163835516	1.465978552	5.71E-06
DLC1	1.415612643	1.211353962	1.654313453	1.23E-05
EDNRB	1.399422216	1.151835932	1.700226989	0.000717168
PTPRM	1.536564821	1.309744384	1.802665832	1.36E-07
CDH11	1.293018829	1.136406363	1.471214653	9.57E-05
VWF	1.311253309	1.146520168	1.499655469	7.62E-05
MKI67	0.72435004	0.619942561	0.846341279	4.89E-05
PAPPA	1.316016433	1.131092335	1.531174069	0.000378865
COL4A1	1.45567364	1.236927717	1.713103941	6.21E-06
NRXN2	1.320843193	1.143640275	1.525503062	0.000153042
MPDZ	1.480310561	1.294141932	1.693260455	1.06E-08
MYLK	1.233183832	1.141786153	1.331897711	9.57E-08
SIPA1L3	0.672635279	0.538610026	0.840010763	0.000469299
CSPG4	1.351290017	1.196980566	1.525492362	1.14E-06
SVIL	1.323966879	1.177727304	1.488365169	2.61E-06
DSEL	1.526597445	1.22282359	1.905834806	0.000186279
PRUNE2	1.248471105	1.133494981	1.375109839	6.73E-06
SMARCA4	0.632608667	0.501114461	0.798607418	0.000117382
NLGN4X	1.315132549	1.133414037	1.525985709	0.000305489
TSHZ3	1.350798683	1.172406776	1.556334472	3.17E-05
TNS1	1.353389151	1.215905818	1.506417821	3.08E-08
MAGI2	1.859893691	1.45742291	2.373507729	6.12E-07
GRIN2A	1.42620363	1.176313238	1.72917955	0.000303627
NRK	1.662128718	1.381276484	2.000086084	7.43E-08
PCDH9	1.790875882	1.436212332	2.233121352	2.28E-07
FLNA	1.298360926	1.169121987	1.441886401	1.06E-06
MAP1B	1.35371583	1.207991261	1.517019707	1.87E-07
KCNMA1	1.217178463	1.115381586	1.328265975	1.03E-05
SORCS1	1.857596928	1.427045167	2.418049847	4.16E-06
KLF3	0.623873741	0.488250844	0.797169017	0.000161581
CD93	1.344996819	1.160260354	1.559146994	8.43E-05
CNTN4	1.642488781	1.305289078	2.066798413	2.31E-05
BNC2	1.298635877	1.133668288	1.487608994	0.000163293
MYH11	1.146163291	1.086118539	1.209527544	6.73E-07
TNN	1.528929643	1.300506911	1.797472842	2.71E-07
THSD7A	1.742759471	1.398644086	2.171539282	7.44E-07
FN1	1.286824242	1.132876442	1.461692174	0.000104865
SPTBN4	0.558180536	0.394743431	0.789286119	0.000971548
PCDHB5	1.363712852	1.208192543	1.539251961	5.13E-07
KCNT2	1.810436544	1.407623621	2.328520517	3.79E-06
ITIH5	1.455575431	1.245305106	1.701349995	2.41E-06
CTNNA3	1.641725042	1.359927838	1.981914803	2.47E-07
DLG2	1.676788874	1.290807795	2.178187131	0.00010777
CNTNAP1	1.335675832	1.171517187	1.522837178	1.52E-05
MYO5A	1.41080913	1.157813904	1.719086628	0.000642071
COL14A1	1.29357537	1.167694423	1.433026659	8.31E-07
LAMA4	1.407370016	1.201738243	1.648187843	2.23E-05
SLIT3	1.311592126	1.162484679	1.479825012	1.06E-05
FILIP1	1.397943016	1.237545112	1.579130052	7.14E-08
GREB1	1.561828022	1.199601736	2.033430511	0.000927132
NID1	1.597031299	1.337578961	1.906810022	2.27E-07
TNC	1.193745029	1.086709953	1.311322484	0.000219981
PCDH18	1.461774884	1.235508307	1.729479113	9.66E-06
PTPN13	1.568869756	1.328006165	1.853419343	1.19E-07
MYO9A	1.531487158	1.235210976	1.898827779	0.00010204
FIGN	1.597910979	1.300240803	1.963728173	8.34E-06
CPXM2	1.228597226	1.126610816	1.339815953	3.22E-06
SLCO6A1	2.393111862	1.439193036	3.979302456	0.0007703
DIP2C	1.498772818	1.249189875	1.798221395	1.34E-05
RUSC2	1.573679346	1.281997482	1.931725075	1.46E-05
EPHA3	1.331028023	1.15887327	1.528756978	5.20E-05
AKAP12	1.384602073	1.235565553	1.551615692	2.14E-08
COL15A1	1.248520615	1.100023912	1.417063493	0.000591396
CNTN3	1.58744327	1.207825771	2.086373874	0.000919449
XRN1	0.637376023	0.506083197	0.80273006	0.00012965
ARHGEF17	1.548817957	1.305924864	1.836887505	4.99E-07
FILIP1L	1.351476292	1.174410114	1.555238792	2.63E-05
KCNQ5	2.259110495	1.532219838	3.330840721	3.89E-05
ITPR1	1.321083973	1.124351608	1.552239397	0.000712762
WWC3	1.438600327	1.208187937	1.712954447	4.44E-05
COL6A2	1.258356728	1.122711888	1.410390033	7.85E-05
AR	1.503229929	1.193872516	1.892748338	0.000525724
ZNF423	1.397975829	1.196588205	1.633257297	2.43E-05
FBXL7	1.479079181	1.269528109	1.723219209	5.12E-07
SV2A	1.340877879	1.146616645	1.568051095	0.000239431
WDR62	0.616250315	0.49427722	0.768322785	1.69E-05
IBTK	0.700678191	0.573444943	0.856141349	0.000503041
SMC2	0.660348484	0.534332564	0.816083745	0.000122459
ZZEF1	0.66374807	0.522035408	0.843930305	0.000823605
E2F7	0.728149174	0.614196869	0.863243118	0.000258651
TSHZ2	1.29985051	1.135702556	1.487723471	0.0001404
RABGAP1	1.514195361	1.220891111	1.877962392	0.000158853
NUAK1	1.457184823	1.223059522	1.736127777	2.52E-05
ARHGEF10	1.438527932	1.246465048	1.660185027	6.59E-07
ATRNL1	2.153224465	1.476071707	3.14102328	6.86E-05
PDE3A	1.412033836	1.221592465	1.632164254	3.04E-06
NOTCH3	1.312945048	1.135315327	1.518366448	0.000241475
OBSL1	1.416335209	1.221652812	1.642042161	3.96E-06
PTPRJ	0.663308572	0.524885269	0.838237017	0.000587006
NES	1.448392344	1.264100141	1.659552368	9.55E-08
HSPA12A	1.463205737	1.227253562	1.744522156	2.21E-05
PSD	1.259124224	1.100824363	1.440187795	0.000775904
CDH2	1.243797268	1.125005017	1.375133105	2.05E-05
ADAMTSL3	1.479670361	1.260159208	1.737418862	1.73E-06
EGFLAM	1.388552338	1.162984471	1.657870456	0.000284146
CDH6	1.621798234	1.321229811	1.990743388	3.77E-06
ATXN1	1.539783153	1.237211333	1.916351795	0.000110238
POP1	0.674012455	0.533116354	0.852145664	0.000976596
THBS4	1.129418724	1.065142837	1.197573331	4.68E-05
NRG3	1.780380411	1.284460301	2.467771411	0.000534609
MN1	1.290542721	1.152568489	1.445033879	9.81E-06
AMPH	1.533374477	1.269899681	1.851514196	8.83E-06
KLHL4	1.617941461	1.247737964	2.097984229	0.000283884
PRICKLE1	1.373998662	1.195868284	1.578662423	7.30E-06
TRPC4	1.682296993	1.362316023	2.077435136	1.35E-06
MYH14	0.762574514	0.659038718	0.882375912	0.000271792
GRIK2	2.803580899	1.669546161	4.707905681	9.70E-05
ADCY2	1.532643485	1.200460049	1.956746543	0.000612926
OSBPL6	1.474068495	1.173155595	1.852165166	0.00086598
BOC	1.375895079	1.217523501	1.554867128	3.15E-07
NLGN1	1.481802028	1.222046305	1.796770908	6.36E-05
PDZRN3	1.346518612	1.17168956	1.547434094	2.75E-05
A2M	1.348004229	1.181459172	1.538026404	9.07E-06
PLK1	0.734131446	0.612813933	0.879465937	0.000797505
BCHE	1.336233714	1.208730503	1.477186629	1.47E-08
SLC6A15	1.664373592	1.251338294	2.213741453	0.00046417
PRICKLE2	1.383254051	1.224966339	1.561995387	1.67E-07
SLC12A9	0.685934846	0.550593846	0.854543901	0.000774632
COL8A1	1.217943803	1.098203746	1.350739434	0.000188393
KCNA5	1.302933578	1.121870759	1.513218787	0.000527515
TTLL7	1.354105533	1.161442083	1.578728566	0.000108304
CLCN3	0.700038766	0.571738716	0.857129769	0.000555515
KCNT1	0.588534388	0.446337949	0.776032437	0.000172002
CASP5	0.742959333	0.636278995	0.867526	0.000172042
AEBP1	1.235219051	1.110713808	1.373680683	9.74E-05
CYFIP2	1.296333528	1.120329415	1.499987944	0.000490029
PDZRN4	1.319304167	1.170341487	1.487227022	5.81E-06
ZNF667	2.112813525	1.538182873	2.90211331	3.86E-06
COL4A2	1.383217881	1.196253937	1.599402641	1.19E-05
CCDC80	1.250949631	1.124112912	1.392097682	4.05E-05
ALPK3	1.372624583	1.180067352	1.596602299	4.01E-05
MMP16	1.695373479	1.331381931	2.158878054	1.86E-05
CHRM2	1.333610716	1.155811555	1.538760824	8.03E-05
OSBPL1A	1.355748557	1.132016842	1.62369859	0.00094123
SCUBE2	1.338572862	1.15997978	1.544662534	6.58E-05
KIF3C	1.392782198	1.15591217	1.678191735	0.000495191
SATB1	1.506853869	1.212972867	1.87193683	0.000212031
COLEC12	1.344994423	1.179025988	1.534325804	1.03E-05
ITGA7	1.397487243	1.220837724	1.599697123	1.21E-06
MAP7D3	1.56705051	1.251263922	1.962533449	9.15E-05
GABBR1	1.458057232	1.212012485	1.754050324	6.36E-05
SOX5	1.756740293	1.312552719	2.351247621	0.000151421
ARHGAP20	1.540353806	1.21579593	1.951552716	0.000345528
OLFML2B	1.271925289	1.12700444	1.435481426	9.73E-05
ADAMTS3	2.126466158	1.533606427	2.948512892	6.06E-06
CNTN1	1.352728887	1.190640625	1.53688309	3.49E-06
RNF217	1.776855562	1.435420596	2.199505635	1.29E-07
ROR2	1.312999456	1.172023652	1.470932407	2.61E-06
NAP1L2	1.652915551	1.369288335	1.995291822	1.67E-07
TUSC3	1.353594809	1.193249332	1.535487058	2.52E-06
ABCA9	1.496148178	1.234860475	1.812722503	3.89E-05
PGBD1	1.462730888	1.190250474	1.797589414	0.000299319
ABCB5	2.532528003	1.538431418	4.16898538	0.000258428
PLCL1	1.873324069	1.487664198	2.358961836	9.43E-08
ZNF532	1.510572598	1.251356456	1.823484877	1.75E-05
PDZD8	0.705766445	0.587332266	0.848082601	0.000200731
SGIP1	1.52251346	1.246913325	1.859028361	3.69E-05
PHLDB2	1.281662863	1.123281173	1.462376236	0.000226575
FOXP2	1.463157291	1.226055534	1.746111167	2.45E-05
WNK3	2.695393154	1.602509417	4.533604718	0.000185873
HGF	1.491437375	1.191291263	1.867205369	0.000488968
AXL	1.425495971	1.219362534	1.6664763	8.64E-06
ATP8B2	1.444454049	1.224290469	1.704209543	1.31E-05
DPP10	1.653389393	1.242460821	2.200227515	0.000562455
KIF15	0.748129841	0.645162604	0.867530534	0.000122578
ZBTB16	1.319147911	1.153838607	1.508140913	5.02E-05
MYOCD	1.361870642	1.206961687	1.536661575	5.35E-07
BICC1	1.489155778	1.249693496	1.774503058	8.51E-06
GUF1	0.60795812	0.473418865	0.780731616	9.64E-05
ADAMTS1	1.406820851	1.233672734	1.604270609	3.51E-07
ABL2	1.770938191	1.290807054	2.429659852	0.00039706
PGR	1.907572855	1.478717027	2.460804962	6.67E-07
GPRASP1	1.582425309	1.339393201	1.86955545	6.86E-08
EPHA7	1.335365628	1.16875667	1.525725078	2.11E-05
GNAZ	1.348823072	1.160381562	1.567866759	9.73E-05
PRTG	1.920091895	1.427207183	2.583193898	1.63E-05
LAMC1	1.670219547	1.410443312	1.977841514	2.73E-09
B4GALNT4	0.781106628	0.684606937	0.891208563	0.000240791
SEC31A	1.782819596	1.335701848	2.379607185	8.68E-05
LTBP1	1.477615498	1.257396545	1.736403339	2.12E-06
ZHX2	1.430788855	1.159752168	1.765167425	0.000828574
F13A1	1.232240689	1.112295377	1.365120406	6.42E-05
TRIM26	0.602990883	0.454709708	0.799626662	0.000443462
DAAM1	1.599723392	1.254723304	2.039585081	0.000150146
ZFPM2	1.516160178	1.272216974	1.806878648	3.32E-06
MXRA8	1.314599015	1.15642434	1.494408677	2.89E-05
CAND2	1.505199444	1.288428609	1.758440749	2.55E-07
PCDH12	1.448908058	1.177500295	1.782873913	0.000458429
NFATC4	1.5355006	1.259283296	1.872304748	2.25E-05
ATP1A2	1.269166957	1.152407916	1.397755727	1.29E-06
ZNF626	1.617349294	1.29339611	2.022442095	2.49E-05
PRKD1	1.617116044	1.368986662	1.910218976	1.55E-08
MAGEE1	1.50861311	1.251927368	1.817927759	1.55E-05
ABCA8	1.277692598	1.133735939	1.439928222	5.87E-05
ITGAD	0.505513577	0.346907021	0.736635355	0.000383642
TBC1D9	1.375549026	1.159775449	1.631466784	0.000249648
KIF14	0.754113727	0.637805671	0.891631321	0.000959796
ABCA1	1.386903	1.152282742	1.669295099	0.00054217
FGFR1	1.439169433	1.231205961	1.682260094	4.83E-06
CACNA2D1	1.375554721	1.170577432	1.616425142	0.0001075
CACNB2	1.362639283	1.141108788	1.627176861	0.000630481
BACH2	1.482340783	1.202710644	1.826984909	0.000223785
CNKSR2	1.571494931	1.282849378	1.925086732	1.27E-05
LAMB1	1.498402768	1.238803881	1.81240218	3.10E-05
EML1	1.352989552	1.191954723	1.535780422	2.93E-06
PYGM	1.343779325	1.127126291	1.602076794	0.000987561
AVPR1A	1.519985218	1.204459728	1.918167133	0.00042021
CDH19	1.568402306	1.316195535	1.868936439	4.86E-07
NRP1	1.493233839	1.234584308	1.806071309	3.61E-05
PAQR9	2.942780612	1.653932722	5.23597944	0.00024116
ZFYVE28	0.571893225	0.412151936	0.793546826	0.000826959
CHL1	1.415670539	1.162574293	1.72386667	0.000542362
CC2D2A	1.661490405	1.3799429	2.000481589	8.35E-08
UHRF1	0.744342646	0.642377434	0.862492898	8.57E-05
KCNA1	1.43670873	1.167259423	1.768357517	0.000627528
PLOD2	1.519182247	1.281736103	1.800616127	1.42E-06
NOVA1	1.681932658	1.360203841	2.079759945	1.59E-06
TRAM1L1	1.615921139	1.24654953	2.094743179	0.000289756
SYNPO2	1.204438238	1.120162407	1.295054592	5.01E-07
HECTD2	1.679322608	1.269298725	2.221797254	0.000283831
NID2	1.387362997	1.176925261	1.635427627	9.58E-05
TTF2	0.580418535	0.467169358	0.721121087	9.01E-07
CHSY3	1.536111634	1.262599916	1.868873046	1.78E-05
GJA1	1.29747713	1.149338205	1.464709774	2.55E-05
THBS1	1.216324827	1.089408769	1.358026598	0.000495742
ZNF677	1.98082612	1.535309232	2.555623345	1.46E-07
EHBP1	1.696273608	1.355541599	2.122652786	3.86E-06
SALL2	1.437987523	1.267987687	1.630779335	1.52E-08
RGL1	1.362744318	1.161776178	1.598476635	0.000143537
E2F8	0.634685483	0.536719593	0.750532807	1.07E-07
FKBP10	1.242223536	1.096791809	1.40693913	0.00063955
ZNF540	1.645805974	1.26878065	2.134866498	0.000174515
CNR1	1.39800941	1.207909571	1.618027011	7.02E-06
DGKI	2.744366891	1.811733282	4.15709625	1.89E-06
NEFL	1.467987956	1.180610643	1.825316967	0.00055305
AOX1	1.284769047	1.123885249	1.468683306	0.000241656
PCDHB4	1.381631793	1.179810736	1.61797681	6.01E-05
KIFAP3	1.459641021	1.184726026	1.798349883	0.000382231
BCAN	0.569484772	0.420802956	0.77070016	0.000265176
FANCA	0.632338252	0.495740304	0.806574857	0.000223284
KCNH2	1.299510779	1.15860802	1.457549262	7.67E-06
ENPEP	1.398294118	1.169914904	1.671255262	0.000228867
CENPE	0.736067356	0.625491174	0.866191523	0.000224664
ZNF512B	1.363545908	1.170911626	1.587871707	6.60E-05
EHD2	1.353432805	1.165151098	1.572139751	7.50E-05
NCAPH	0.733278905	0.620191899	0.866986417	0.000283269
CRIM1	1.429384956	1.175061614	1.738752527	0.00035188
WDR17	1.713918581	1.299751407	2.260060569	0.000134736
PDGFRB	1.305111911	1.143875522	1.489075573	7.56E-05
ADARB1	1.418326137	1.173066961	1.714862916	0.000308795
LRRCC1	0.667577615	0.538495966	0.827601134	0.000227852
RUNX1T1	1.443641359	1.189025297	1.752780517	0.000208239
ENOX1	1.425407859	1.195985627	1.698839451	7.53E-05
SMTN	1.251616433	1.132045478	1.383816927	1.18E-05
PLAG1	1.399462261	1.149144444	1.704306739	0.000830079
ZWINT	0.701418763	0.596426611	0.824893242	1.81E-05
ZNF569	1.801602864	1.367795631	2.372995502	2.81E-05
SASS6	0.579490371	0.446332368	0.752374495	4.21E-05
KCNG4	5.600764241	2.545790652	12.3217359	1.85E-05
DAB2IP	0.642363323	0.505370194	0.816491839	0.000298525
WDR35	1.534581751	1.219384797	1.931253495	0.000261383
ATP2B4	1.329862867	1.16937184	1.512380565	1.40E-05
DDX17	1.497341278	1.194687705	1.876666925	0.000458364
SORBS1	1.227512042	1.11942531	1.346035149	1.31E-05
KL	1.386112188	1.15491953	1.663585164	0.000453153
EBF1	1.368651774	1.176570318	1.592091565	4.75E-05
TTC7B	1.832888891	1.388610701	2.419311393	1.89E-05
FERMT2	1.426968604	1.278881182	1.592203736	2.01E-10
RASGRF2	1.649586081	1.249208632	2.178286452	0.000417712
TSPYL5	1.295162904	1.164841946	1.440063996	1.75E-06
MS4A14	1.722262373	1.277394714	2.322060399	0.000362777
PLCB3	0.62034971	0.493881724	0.779202274	4.05E-05
ARHGAP29	1.58175663	1.247486054	2.0055968	0.000153361
THBS3	1.443411756	1.209912904	1.721973119	4.57E-05
ZNF382	2.088755331	1.39927975	3.117960389	0.00031382
WASF3	1.360691892	1.20363351	1.538244332	8.57E-07
IKBKE	0.689185886	0.559728693	0.848584665	0.00045382
PRKAA2	1.44565827	1.251705876	1.669663675	5.32E-07
MOCOS	0.765790959	0.661009098	0.887182635	0.00037876
DOT1L	0.530494637	0.40137638	0.70114878	8.39E-06
LAYN	1.429761523	1.244637929	1.642419827	4.34E-07
ANGPT1	1.509410951	1.273374946	1.789199187	2.08E-06
ANKRD35	1.45277242	1.238189606	1.704543226	4.65E-06
TF	1.178344951	1.074740579	1.291936725	0.000474041
EBF2	1.569663674	1.215600885	2.026852793	0.000546353
SCN7A	1.483255481	1.25736734	1.749724805	2.91E-06
SLC45A1	1.766624405	1.367037548	2.283011021	1.36E-05
VGLL3	1.392063424	1.188559866	1.630410576	4.09E-05
ZSCAN18	1.390323814	1.235735204	1.564251225	4.26E-08
ITGA5	1.246055681	1.101812942	1.409181814	0.000457273
RUNDC3B	1.424406633	1.189174391	1.706170493	0.000122362
FZD2	1.259132612	1.10009023	1.441168089	0.000824086
MCC	1.499672895	1.213685362	1.853049286	0.000174109
MAP4K4	1.518643076	1.192908248	1.933322865	0.000693845
JPH2	1.316752202	1.184556938	1.463700313	3.44E-07
NCAPG	0.774572684	0.676026284	0.887484491	0.000233989
PABPC5	2.197518966	1.619634178	2.981592803	4.25E-07
ZNF665	1.774087073	1.264257668	2.489512242	0.000911652
NPR3	1.739577037	1.440025237	2.101441133	9.36E-09
NRP2	1.404326862	1.186168902	1.662608026	8.08E-05
COL4A5	1.337375917	1.192232799	1.500188843	7.06E-07
PPARGC1B	0.707532389	0.576370906	0.868541552	0.000942163
DIAPH3	0.696907049	0.569418515	0.852939308	0.000459913
LRRC8B	0.606155714	0.456312975	0.80520338	0.000549437
ZFP28	1.70298856	1.308940471	2.215662286	7.34E-05
FAM83H	0.757321042	0.659094445	0.870186611	8.79E-05
USP51	1.981148962	1.541399169	2.546356122	9.35E-08
TMPO	0.66641443	0.538642611	0.824495098	0.000186288
SMAD9	1.30456385	1.140427861	1.492323099	0.000106493
QKI	1.544778615	1.228992002	1.941705857	0.00019365
TGFBR1	1.725793335	1.364931679	2.182059866	5.13E-06
ADAMTS8	1.386772837	1.224804618	1.57015974	2.47E-07
CHRDL1	1.291480485	1.16497449	1.431723919	1.16E-06
PDE2A	1.546367397	1.289921243	1.853796995	2.46E-06
HTR2A	1.576878871	1.275686662	1.949183171	2.54E-05
APLP2	1.515017579	1.208502404	1.899274885	0.000315738
DAB2	1.473919934	1.24446002	1.745688842	7.02E-06
USP44	2.87738195	1.917528682	4.317706933	3.32E-07
DDR2	1.355028084	1.200066793	1.529999097	9.42E-07
KCTD10	1.635750797	1.34272422	1.992725407	1.03E-06
BUB1	0.778649203	0.673099595	0.90075018	0.000761599
CDCA2	0.711422138	0.609358429	0.830580877	1.64E-05
SEMA4C	1.678278415	1.350535866	2.085556191	3.00E-06
FGD1	1.347127433	1.14097383	1.590529312	0.000437718
MAB21L2	1.604692798	1.348241319	1.909924386	1.02E-07
DACT1	1.328405987	1.14932725	1.535387303	0.000121156
AOC3	1.306635803	1.173736087	1.454583479	1.02E-06
COL18A1	1.343421323	1.158786319	1.557475112	9.09E-05
AMOTL1	1.5195188	1.282899031	1.799781063	1.27E-06
FASTKD1	0.647256211	0.500996914	0.836213939	0.000872656
CDON	1.439416235	1.180818086	1.754647159	0.00031219
LGR4	0.73895494	0.630091727	0.866626841	0.000198912
NPTX2	1.248112762	1.097886856	1.418894359	0.000706111
PRKG1	1.683118805	1.389814257	2.038321953	9.86E-08
NPR1	1.372216384	1.165629967	1.615416433	0.000144136
CD109	1.332616167	1.142657835	1.554153652	0.000252655
PTCHD1	1.305025986	1.12917773	1.50825931	0.000311954
FOXF1	1.279757366	1.126662042	1.453655893	0.000147925
CLIP4	1.55186376	1.310563456	1.837592157	3.46E-07
DNAJC6	1.460904986	1.176646181	1.813836149	0.000596164
DZIP1	1.756120501	1.438022444	2.144583505	3.34E-08
HEG1	1.384419743	1.176154375	1.629563317	9.21E-05
PLCH1	0.684258718	0.57398393	0.81571969	2.32E-05
ZNF615	1.428679839	1.174564817	1.737772197	0.00035682
DAAM2	1.454018221	1.274938984	1.658251111	2.38E-08
ZNF570	1.538309179	1.191034782	1.98683965	0.000969783
FBLN1	1.230743757	1.126107139	1.345103093	4.65E-06
SPON1	1.164914518	1.06760528	1.271093221	0.000603928
MYEF2	1.400073724	1.193633033	1.642218654	3.55E-05
MEFV	0.553057079	0.390581639	0.783119589	0.000845254
CLGN	1.520606949	1.28893238	1.79392304	6.71E-07
RECK	1.536518393	1.306660815	1.806810722	2.05E-07
MAGED1	1.392657821	1.184950935	1.636773092	5.84E-05
TIMP3	1.223736714	1.09660258	1.365610089	0.000308947
FAM83B	0.782641908	0.686462714	0.892296614	0.000248958
ADCY4	1.315255922	1.124027428	1.539017729	0.00062967
SLITRK4	1.865100625	1.467904855	2.369772353	3.37E-07
CLIP3	1.251014361	1.1229233	1.393716678	4.83E-05
KIF18B	0.721014173	0.597668004	0.869816411	0.000633298
FANCD2	0.672869406	0.543821925	0.832539506	0.000265359
HNF4A	0.785940309	0.682589233	0.904939806	0.00081233
SMARCA1	1.37720435	1.193111726	1.589701768	1.23E-05
GCC1	0.582196808	0.424757859	0.79799141	0.000771728
TAP2	0.654957213	0.538861638	0.796065114	2.13E-05
DPYSL3	1.276592299	1.163223743	1.401009829	2.66E-07
ILK	1.38126768	1.145650004	1.665343166	0.000712105
CHAF1A	0.586866596	0.466121886	0.738889145	5.77E-06
RAI14	1.620225412	1.357312923	1.93406424	9.20E-08
ACTG2	1.162115451	1.095484509	1.232799104	6.13E-07
ACSS3	1.636560469	1.310687667	2.043454162	1.37E-05
SOBP	1.39458775	1.181701598	1.645825814	8.30E-05
RBM15	0.55149406	0.422475841	0.719912639	1.20E-05
SESTD1	1.3964617	1.150212796	1.695429999	0.000741184
KIF9	0.488048358	0.331639251	0.718223791	0.000273771
COL21A1	1.661240332	1.343386848	2.054299881	2.81E-06
HOXD8	1.811101302	1.336477474	2.454278498	0.000127864
PTPN14	1.54214115	1.210294669	1.964975463	0.000458652
