# Supplementary material for: Significance of a Tumor Mutation Burden Gene Signature with Prognosis and Immune Feature of Gastric Cancer Patients
Source: Int J Genomics. 2022 Jun 8;2022:7684606. doi: 10.1155/2022/7684606 (PMC9201710; doi:10.1155/2022/7684606)
Supplement: Supplementary 2 — Table 1: result of univariate Cox analysis. Supplementary Table 2: 29 optimal candidates acquired from LASSO regression analysis. Supplementary Table 3: result of multivariate Cox analysis. [file 7684606.f2.zip › Supplementary table 2.txt]

id	futime	fustat	RIMS1	SCN11A	SPTBN4	SLCO6A1	ZZEF1	ARHGEF10	PTPRJ	NES	CDH6	SLC6A15	KCNT1	ABCB5	LAMC1	B4GALNT4	ITGAD	PLOD2	EHBP1	E2F8	LRRCC1	KCNG4	DAB2IP	NPR3	COL4A5	APLP2	MAB21L2	MEFV	CLGN	TAP2	RBM15
TCGA-D7-A74A	225	0	2.608783	2.481992	2.678458	2.590805	4.870214	4.278574	3.929522	3.348131	3.005357	2.646856	2.624572	2.542011	6.364011	2.415731	2.872236	5.09918	5.354183	4.897969	4.189907	2.571145	4.297742	2.639523	3.162157	6.396218	2.509813	2.664479	2.379099	5.145373	5.197921
TCGA-BR-7704	606	0	2.663633	2.517057	3.593486	2.560498	5.03663	6.347777	3.805907	4.894558	3.685525	2.6349	2.754873	2.538923	6.763148	5.163052	2.99171	5.481317	6.232407	3.969465	4.748565	2.571145	5.71402	2.540211	3.373297	6.531044	2.645761	3.09854	2.854828	5.947572	5.009848
TCGA-VQ-A91N	570	1	3.019966	2.496736	2.757875	2.560498	6.020638	5.621425	5.611682	4.559658	3.296265	2.646612	2.924052	2.537272	8.062477	4.923677	2.763636	5.909937	6.41696	4.931778	5.501347	2.578111	5.113256	2.611314	5.077772	7.327403	2.776962	2.781126	2.694152	5.243253	6.096845
TCGA-CD-A4MH	371	0	2.829108	2.526659	2.679726	2.598144	4.815026	4.766523	4.090351	5.188045	4.11927	2.637396	3.345618	2.552899	6.904923	3.11801	2.744147	6.83785	5.190577	4.638729	4.243585	2.593163	4.210678	2.83204	5.271419	6.282465	2.676122	2.813948	2.400053	4.401342	5.05354
TCGA-EQ-8122	243	1	3.067251	2.661823	2.953909	2.573918	5.373494	4.960074	4.927923	5.648341	3.814948	2.706165	2.76665	2.671784	8.221438	4.079697	2.971804	6.510071	6.445489	4.430551	4.912567	2.589817	4.844406	2.941042	4.583583	7.568096	3.454846	2.997944	3.62987	5.216743	5.69159
TCGA-VQ-A91Y	296	1	3.865146	2.693915	3.310138	2.560498	5.71227	5.858829	4.606088	5.306126	4.425878	2.650867	2.746748	2.681977	8.457395	2.662954	2.864128	6.921359	6.695804	4.282385	4.953378	2.613371	4.942882	4.367863	5.852541	7.052034	4.401368	2.887078	3.690017	6.088928	5.748347
TCGA-CG-4438	1645	0	2.863037	2.620975	3.005924	2.654348	5.418931	4.990955	5.011594	4.8077	3.132525	2.748827	2.873564	2.632257	7.601965	3.429293	3.690895	6.66829	6.761135	4.659173	5.623185	2.700261	4.90649	3.245802	3.668041	7.109156	2.805174	3.224014	2.752248	5.917508	6.03482
TCGA-VQ-AA64	560	1	2.712869	2.530306	3.409558	2.560498	5.787666	6.341116	4.503321	5.282894	4.463286	2.64655	3.084982	2.581708	8.437012	3.885705	2.826022	6.783116	6.797413	4.893789	6.096947	2.578074	4.91336	3.612006	6.22227	7.131444	2.907209	2.790591	3.829633	5.252344	6.22274
TCGA-CG-5717	212	1	2.792658	2.569026	2.959127	2.560498	5.118383	4.247254	4.086259	4.394933	3.671329	3.159879	2.797369	2.567375	7.120435	3.205469	2.906789	5.718937	6.505169	4.106632	4.561184	2.571145	4.667447	4.719208	4.785211	6.584211	3.256831	3.229254	2.789633	5.078499	5.486169
TCGA-BR-A4J8	411	0	3.572327	2.630277	3.386048	2.560498	4.559655	5.179261	3.916449	4.86563	4.165687	2.642348	2.792485	2.572643	6.980601	2.516896	2.884171	5.535126	5.971779	3.613089	4.683265	2.601785	4.213397	2.740215	5.515493	6.067288	2.959973	2.692593	3.748024	4.210879	5.231864
TCGA-CG-5732	2100	1	2.805695	2.512504	3.109455	2.560498	5.373202	4.59451	4.209117	4.199525	2.865914	2.6349	2.856126	2.532705	6.753372	2.462757	3.128904	5.341129	5.253036	4.114961	3.839146	2.579537	4.843002	2.57958	4.077479	6.497641	2.538219	3.047194	2.751739	4.786478	5.356122
TCGA-CG-4477	942	0	2.840892	2.776018	2.915068	2.560498	5.150909	5.882277	4.205818	4.762335	4.072535	3.485044	2.720923	2.654895	7.38876	4.689127	3.262194	6.576677	6.383397	4.231916	5.589493	2.730441	4.861453	3.009306	4.51563	6.5222	2.638178	3.860925	3.08653	6.115997	5.646078
TCGA-HU-A4G3	170	0	2.777211	2.490926	2.823333	2.560498	5.37786	5.103043	3.845674	4.611233	3.166844	2.645917	2.651277	2.652105	6.875616	2.299019	2.865328	4.992788	5.183799	3.876737	3.894914	2.571145	4.070706	2.540399	5.469449	5.745002	2.678604	2.720987	2.58128	4.404859	5.398409
TCGA-IN-AB1X	411	0	2.75498	2.540023	4.653929	2.608358	6.167954	5.691935	4.468514	3.525904	3.267613	3.060944	2.682408	2.532705	7.683291	2.531372	3.574734	5.573331	6.651043	4.359631	4.691896	2.571145	5.567916	3.094526	4.578648	6.914727	2.727402	3.482158	2.868968	6.572556	6.455412
TCGA-CG-5721	183	0	2.911777	2.500287	3.131131	2.560498	5.387533	3.953812	4.838548	4.80771	2.785816	2.6349	2.736701	2.532705	6.862994	5.16862	3.056446	5.298281	5.648101	4.101925	4.455454	2.571145	4.725226	2.577497	3.249831	6.304495	3.106662	3.505133	2.431993	6.549106	6.009722
TCGA-CD-A489	344	1	2.682164	2.705081	3.077121	2.612753	4.930865	5.547871	3.964092	5.136282	3.584026	2.835095	2.700938	2.835654	7.910244	3.955986	2.833885	6.506515	7.159848	3.304097	4.920245	2.579391	4.855514	3.551449	5.697317	7.495656	5.509932	2.777685	3.314878	5.469136	5.043391
TCGA-RD-A8N4	2171	0	2.847564	2.965695	3.858206	2.560498	5.561165	5.5844	4.190928	5.035316	3.489844	2.860709	2.924909	2.549588	8.356976	3.95794	3.007581	6.097896	6.911525	3.196215	5.121969	2.596841	4.974781	4.16732	6.852167	6.496533	4.449182	2.930814	4.84051	4.914328	5.297288
TCGA-BR-6566	378	0	2.6366	2.476891	2.829442	2.560498	5.066244	3.974258	3.935725	3.664367	2.97098	2.6349	2.613568	2.532705	6.715539	2.347683	2.841188	5.918907	4.973438	4.035341	4.402645	2.577944	3.814375	2.755536	2.651758	6.1692	2.532881	2.85574	2.346473	5.232583	4.981525
TCGA-HU-8244	742	0	2.669169	2.511822	2.861323	2.694817	5.413214	3.33116	4.119764	3.528582	2.708337	2.702069	2.63894	2.674925	6.654469	2.620444	2.950648	5.717623	5.38983	4.929199	5.175749	2.603738	4.707154	2.531326	3.406708	6.454842	2.653328	2.801995	2.488648	4.274171	5.619837
TCGA-FP-A9TM	189	0	2.874983	2.55335	2.938572	2.560498	5.999192	5.585078	4.993442	4.249342	3.614599	2.653851	2.764741	2.543801	7.066937	2.875531	3.12436	5.96667	5.949192	5.314782	5.385508	2.596417	4.811917	2.529355	4.674808	6.508026	2.895042	3.046367	3.35408	5.467523	5.989424
TCGA-MX-A5UG	113	1	2.823216	2.883907	3.297999	2.560498	6.285868	6.453939	4.894547	5.784637	4.688773	2.677313	2.91618	2.851458	8.792839	3.655886	3.768425	6.943514	6.575777	3.882731	4.981942	2.57814	5.261551	3.063159	5.971974	6.941585	2.768976	3.837922	2.593165	5.237654	6.323617
TCGA-BR-8590	284	1	3.475443	2.899004	3.351648	2.638675	5.75043	6.003427	4.528485	4.917554	4.39355	2.813644	2.873539	3.035325	8.213163	3.194463	3.647448	6.607531	6.56545	4.48942	4.7378	2.620213	4.842239	3.368892	5.635248	7.4425	3.100551	3.231566	3.466263	5.394834	6.006349
TCGA-VQ-AA69	864	0	2.605815	2.497353	2.732841	2.560498	6.064992	3.586463	5.610948	5.833804	3.05026	2.6349	2.76975	2.532705	8.130825	2.3809	2.726072	4.888913	6.677761	5.560298	5.803124	2.571145	5.544259	2.589901	4.258748	7.658946	2.674747	3.38267	2.346473	5.348467	6.979619
TCGA-CG-5723	2496	0	2.642183	2.500511	2.854255	2.560498	4.142538	5.668335	3.639368	3.611473	2.969887	2.6349	3.64041	2.547162	6.719863	4.118637	3.076076	6.394567	5.517081	3.425606	4.502007	2.593159	4.12699	2.89664	4.494141	6.112925	2.634015	3.209303	3.65649	6.306452	4.986857
TCGA-RD-A8N2	3540	0	2.966728	2.81453	3.46419	2.560498	5.596457	5.876039	4.090342	5.270578	3.424497	2.73817	2.849257	2.610921	9.022516	3.129585	2.904382	6.592704	7.221329	2.509954	5.260869	2.571145	5.007937	3.764259	6.564532	6.526171	4.866827	2.802861	3.937506	4.305872	5.129123
TCGA-BR-7722	466	1	2.732693	2.651232	2.909411	2.649003	4.971129	4.797281	3.966034	4.971696	4.085717	2.658602	2.709906	2.592624	7.009182	2.790004	3.375136	6.019272	5.642385	3.970636	4.205606	2.621336	4.453349	2.888405	4.324566	6.596023	2.93327	2.78346	2.703979	4.693141	4.951949
TCGA-D7-8576	446	1	2.817952	2.589121	2.910251	2.577313	5.545093	5.909611	4.370129	4.975569	5.268111	2.673901	2.73122	2.760927	7.71042	2.860873	3.136858	6.509918	5.533869	4.806587	5.241388	2.632548	4.698778	2.576172	4.264134	7.267133	2.523199	3.128729	2.956654	5.430674	6.021787
TCGA-BR-8058	532	0	3.509603	2.591199	3.080568	2.560498	5.492738	5.711438	4.83824	5.279112	4.524078	2.643881	2.704255	2.623596	7.896313	3.558226	3.493855	6.464071	5.7505	4.853959	4.582795	2.579142	4.672246	3.27599	4.407096	6.395768	2.78066	3.708817	2.566798	5.858252	5.996332
TCGA-VQ-A91E	363	0	2.764905	2.545397	2.833754	2.560498	5.898539	5.875064	4.735652	4.508078	2.995665	2.645255	2.733443	2.552743	7.241333	5.356386	3.276875	4.801413	6.075423	4.643058	5.237365	2.595589	5.040982	2.578113	4.278624	7.171149	2.637729	3.095836	2.536168	5.05577	6.16681
TCGA-HU-8249	881	0	2.721946	2.588979	2.91338	2.633022	4.959729	3.806549	4.411973	5.360001	3.765475	2.795983	3.909597	3.116919	7.272987	3.256897	3.114513	5.574137	6.088545	4.762406	4.82765	2.778561	4.433263	2.63898	3.564275	5.859558	2.672696	3.344519	2.828079	5.158915	5.798088
TCGA-CG-5725	457	1	2.817836	2.476891	2.696287	2.560498	4.640272	4.57862	3.411512	4.910337	3.725209	3.709777	2.914095	2.545003	9.716982	4.931567	2.764126	6.932434	5.530978	4.193856	4.810046	2.571145	3.767062	2.844396	7.924949	7.106147	2.80944	2.722905	4.219674	4.568702	5.659474
TCGA-HU-A4H4	725	0	2.623892	2.501015	2.81158	2.560498	5.316341	4.290001	4.032816	4.688993	3.222369	2.6349	2.676371	2.535886	6.736439	5.125922	2.898415	5.529403	5.664567	4.790649	4.987212	2.604721	5.183671	2.498068	3.314863	6.706781	2.648493	3.188886	2.566788	6.387606	5.830333
TCGA-VQ-A8PJ	82	1	2.634346	2.516846	2.993894	3.282893	5.662817	5.847635	3.843553	4.943981	3.406853	2.673147	2.66173	2.589169	8.159063	2.898722	2.871629	7.380573	5.742686	5.145849	4.274225	2.571145	4.649938	2.583034	5.630781	7.088166	2.582497	2.702734	3.522066	4.969542	5.826256
TCGA-BR-6565	279	1	2.763736	2.520719	2.884779	2.560498	5.259387	4.766075	4.412629	5.135296	3.345235	2.6349	2.654486	2.584108	7.594581	2.49248	2.874424	6.672378	6.076634	4.643084	4.98175	2.588853	5.202567	2.775184	4.565039	6.698134	2.749719	2.954958	2.9732	6.074737	5.945317
TCGA-D7-A4YU	500	0	3.128578	2.581669	4.459718	2.560498	5.689906	4.795857	4.88968	5.122405	3.480208	2.643505	2.892755	2.54273	7.670025	4.529535	3.09133	5.607076	6.723744	4.906191	6.064696	2.593991	4.93344	2.780884	4.717793	6.448988	3.163062	3.496347	2.820186	7.131073	6.478851
TCGA-CD-8535	390	0	2.609323	2.535648	3.030593	2.805694	5.068053	6.126931	4.88724	6.888325	3.576113	2.681139	6.115977	2.576048	7.94515	3.153288	2.835822	5.324607	6.606936	4.866652	5.401745	2.58789	5.054236	3.175369	3.998492	7.096028	2.605626	2.860122	5.471749	5.258326	6.135556
TCGA-BR-6852	423	0	2.640227	2.55657	2.942518	2.582878	5.550147	4.25531	4.940408	4.747382	3.324208	2.746069	2.738847	2.650236	7.032585	2.334416	3.26458	5.7093	5.23834	4.110182	4.749084	2.737846	5.308657	3.073968	3.018285	6.341973	2.562223	3.820536	2.424533	6.265513	5.839121
TCGA-BR-6458	213	0	2.750941	2.650758	3.009143	2.560498	5.687888	6.423436	5.334624	5.720286	3.811231	2.644426	2.728208	2.543803	7.981486	3.218073	3.099561	6.521032	6.169729	5.360036	5.197175	2.571145	5.04045	3.809581	4.078087	7.51429	2.71724	2.987648	3.2118	4.946378	6.289871
TCGA-ZA-A8F6	525	0	3.816	2.55602	3.322864	2.560498	5.743743	5.571963	4.434562	5.294064	3.388519	2.656148	2.771637	2.73417	7.820853	3.392226	3.184199	6.100058	6.758365	3.897368	5.092023	2.571145	4.943433	3.025138	6.113579	6.827384	3.795982	2.803975	3.362831	4.890921	5.467616
TCGA-BR-7196	390	0	2.657355	2.618446	3.415205	2.578562	5.400473	5.450469	4.727425	6.035615	4.199855	2.658384	2.840023	2.618084	8.431654	4.291837	2.974344	6.276097	6.317109	4.391928	4.495156	2.571145	5.275141	3.622415	5.265692	7.023064	2.749953	3.716761	3.127972	5.740696	5.715169
TCGA-IN-A6RI	559	0	2.621613	2.545778	3.222115	3.205721	4.921485	5.877384	4.470644	4.139315	3.230805	2.693186	2.637057	2.54762	6.578305	4.179737	2.806684	4.767375	5.428735	4.626544	4.546592	2.571145	4.272264	2.918309	3.931878	6.580553	2.59707	2.683588	3.091556	5.22754	5.849071
TCGA-B7-5818	356	0	2.605815	2.486242	3.266952	2.560498	4.715797	4.231112	4.854403	4.822707	3.077158	2.642239	2.692809	2.532705	7.97273	2.343368	3.103531	5.091581	5.096982	4.123491	4.242315	2.571145	4.785194	2.61907	2.710623	6.99528	2.553625	3.074884	2.424405	5.039273	5.575205
TCGA-BR-8588	389	0	3.4353	2.620572	2.860124	2.560498	5.372169	5.02545	4.281563	5.116074	3.657171	2.686005	2.843177	2.562898	7.611569	2.872307	2.997403	6.354874	5.595797	4.219584	5.1586	2.580451	4.945725	2.787319	4.54498	6.328676	2.78356	3.463213	3.102224	5.294067	5.704246
TCGA-VQ-A8DU	166	1	2.818644	2.593399	2.830878	3.996636	4.593665	5.811435	3.851603	6.483488	3.656601	2.67493	2.774586	2.686476	7.69952	2.964995	2.82966	6.096056	5.865548	4.556686	4.031875	2.648047	4.789576	2.81214	6.223311	6.803889	2.781426	2.781246	3.044539	4.762012	5.812678
TCGA-HU-A4G9	736	0	2.655068	2.487689	3.328068	2.560498	5.873428	5.535357	4.153655	3.3819	2.734482	2.6349	2.682452	2.537652	5.464862	2.948939	2.825087	3.938808	5.221541	4.647585	5.821564	2.571145	5.053225	2.523067	3.772201	6.341404	2.56025	2.762054	2.425232	4.987749	6.037627
TCGA-CD-A4MG	200	1	2.605815	2.523169	2.683631	2.560498	4.567263	4.049865	3.795814	5.534643	3.183101	2.637988	2.659757	2.550577	6.417031	4.476726	2.770302	6.168527	5.089475	4.077703	5.193053	2.576632	4.012212	2.496526	3.549184	5.854614	2.641079	2.775058	2.412343	4.205342	5.063633
TCGA-HU-8602	679	0	2.605815	2.522809	2.81199	2.560498	5.788411	6.400672	5.580843	5.189752	3.245712	2.640145	2.677502	2.538815	8.309095	2.28998	3.075516	6.460019	6.277058	5.381025	6.995758	2.571145	5.771691	2.598536	2.723767	7.155956	2.556652	4.460842	2.481238	7.221567	6.613747
TCGA-VQ-A91S	690	0	2.622465	2.595074	2.765559	2.560498	6.252693	4.345668	5.237615	6.063775	3.496462	2.649879	3.335218	2.550159	8.018262	5.533407	3.150037	6.346773	6.68276	4.789263	5.796335	2.59112	5.566804	2.725955	3.949338	6.559861	2.705393	3.295961	2.426256	5.843008	6.288818
TCGA-BR-8365	533	1	4.038066	2.967405	3.758724	2.560498	5.808024	5.963111	4.262901	5.345832	4.043153	2.918925	2.93755	4.135953	8.785588	3.515363	3.107603	6.20859	6.620908	3.607225	4.947739	2.587219	4.993223	3.448478	6.820058	6.754198	3.755742	3.01422	3.850547	5.102443	5.880437
TCGA-D7-5578	385	0	2.82997	2.503962	2.779861	2.560498	5.366042	4.202019	4.124119	5.120775	3.410161	2.640262	3.031443	2.532705	7.419604	2.536073	2.906942	5.478488	5.532611	4.804924	4.943657	2.571145	5.284237	2.532104	4.168073	5.991279	2.727023	3.115232	2.767389	4.721891	5.716909
TCGA-D7-8570	752	0	2.625495	2.622513	3.755905	2.560498	5.203385	4.128445	4.361812	4.830452	3.014444	2.672438	2.715866	2.606145	7.813932	2.257204	2.975822	5.667006	5.328916	4.717559	4.756239	2.611351	4.929663	2.59695	3.389631	6.679943	2.698566	3.271532	2.465299	5.471758	5.46492
TCGA-BR-6453	485	0	2.612764	2.678082	2.902277	2.560498	5.085586	4.720419	4.059919	4.990279	3.063495	2.648907	2.750354	2.671833	6.627246	2.966179	3.829524	4.872404	4.999634	3.724539	4.543663	2.579482	4.315444	2.706051	3.457655	6.064324	2.73657	2.822864	2.456461	4.601182	5.089474
TCGA-HU-A4GP	273	0	2.981261	2.568064	2.724592	2.572866	5.494448	5.039981	4.501471	5.111227	3.544068	2.694671	2.675045	2.630575	7.095152	3.758876	2.880871	5.098339	5.70005	4.650762	5.158186	2.582646	4.896191	2.503099	5.109203	6.594416	2.830882	2.894163	2.423827	4.707614	5.88298
TCGA-HU-A4H8	270	0	2.815083	2.484944	2.796312	2.560498	6.055916	3.605784	5.594379	4.520276	2.994924	2.690286	2.719296	2.55465	5.977142	2.328498	2.822074	4.312522	5.644578	4.991708	5.591979	2.57677	5.529272	2.817575	4.050357	5.8923	2.768194	2.713146	2.389216	5.568119	6.10129
TCGA-VQ-A8E3	661	1	2.794196	2.670355	3.267986	2.718483	5.964425	5.071097	4.865835	4.429703	3.568422	2.986132	3.243701	3.263168	6.953082	2.608358	3.598088	5.318413	6.055616	4.784742	5.442345	2.83689	4.940155	2.76945	3.318479	6.331411	2.60875	3.456186	2.75468	6.999112	5.98963
TCGA-KB-A93H	1145	0	2.61231	2.493572	2.696576	2.641779	4.757319	3.818757	3.69523	3.814881	3.237977	2.643651	2.902239	2.553005	6.420244	2.582682	2.757681	6.084334	6.478528	4.073303	4.948707	2.58668	4.135726	2.485536	3.074989	7.07064	2.574407	2.652432	3.940776	5.089829	5.42096
TCGA-BR-8297	225	0	4.238099	2.654246	3.534251	2.560498	5.408863	5.353159	4.070653	5.066286	3.739411	2.68178	2.755126	2.611759	8.545672	3.284059	2.982507	6.410643	6.432362	4.280373	5.385373	2.590719	4.982688	3.000606	6.335924	6.51436	4.035716	2.823859	3.326912	4.939303	5.829257
TCGA-HU-A4GF	785	0	2.605815	2.482082	2.698472	2.560498	5.50382	5.497911	4.385897	5.42188	3.551309	2.638973	2.732866	2.532705	7.77174	5.066953	2.784086	6.385587	6.702456	4.52112	4.337211	2.592728	4.948648	2.52098	4.345253	6.774038	2.637135	3.629712	2.764317	5.973633	6.191876
TCGA-HU-A4GT	198	0	2.61141	2.481705	2.689546	2.560498	5.440221	3.689633	4.120325	4.043769	3.191992	2.6349	2.629124	2.537105	6.342132	5.152847	2.771163	6.027192	5.032622	4.76043	5.756017	2.591173	4.293536	2.49909	3.121798	5.931098	2.543764	2.748383	2.463976	5.540618	5.497407
TCGA-VQ-A8PX	1964	0	2.672306	2.574312	2.925951	2.560498	5.669911	6.325286	4.667885	4.354514	2.982923	2.6349	2.763413	2.542483	6.781976	5.701666	2.83353	4.636678	5.751844	4.722471	4.800343	2.586046	5.214382	2.56827	4.545335	6.818621	2.595501	3.101223	2.82488	5.472718	6.265491
TCGA-IN-A7NR	198	0	3.040571	2.504052	2.856234	2.640358	4.842167	4.584305	3.886971	3.984014	3.421817	3.145367	2.671961	2.569805	6.92027	2.884748	3.02428	5.682543	6.529427	4.055663	4.570261	2.571145	4.437377	3.771775	4.437822	6.354331	2.660771	2.954648	2.8914	4.802195	5.247691
TCGA-HU-A4G8	544	0	2.708981	2.484054	2.721838	2.896827	5.727934	4.431014	4.342584	4.654556	3.677753	2.6349	2.818025	2.539253	7.210901	4.299699	3.164121	5.529669	5.720546	4.972574	5.814223	2.581129	5.105438	2.627157	4.137205	5.851981	2.637675	2.911649	2.754136	6.475042	6.566963
TCGA-CG-5724	366	1	2.677825	2.616872	2.760719	2.581719	4.969147	4.560226	3.994974	4.386752	2.728745	2.694499	2.802856	2.58369	7.325621	2.527915	2.854529	6.503898	6.607723	4.113084	4.424537	2.666836	4.420617	2.614139	2.755917	6.384019	2.543281	3.266074	2.64665	5.643525	5.295104
TCGA-BR-4201	940	1	2.669015	2.630371	2.823831	2.61252	4.971729	5.068271	4.424855	4.37622	3.794338	2.644118	3.019915	3.122338	8.091562	4.395905	3.105429	6.963327	6.216466	3.978198	4.799871	2.587508	4.344993	3.292967	5.233071	6.925934	2.537606	3.65095	3.338487	5.189685	5.300522
TCGA-VQ-A91K	1862	0	2.879181	2.541779	4.041059	2.560498	6.389571	4.475341	5.23121	4.945005	2.968028	2.642371	2.88935	2.554342	6.964471	2.48083	3.021447	5.661101	6.026382	4.362449	4.667578	2.571145	5.763422	3.353362	4.000885	7.269118	3.081562	3.130299	2.644317	5.742623	5.969511
TCGA-IN-A6RL	406	1	2.827105	2.571489	3.040238	3.174688	4.887828	5.874834	3.625296	3.426332	3.175294	2.778555	2.634812	2.559527	7.026339	2.803128	2.763211	5.560153	5.659179	3.597191	4.513775	2.584878	4.275487	2.71011	4.967078	6.501792	2.738354	2.863571	2.973477	5.473488	5.437134
TCGA-MX-A5UJ	368	0	3.088436	2.667627	3.137662	2.560498	5.484963	4.951993	4.130777	5.158862	3.484399	2.660657	2.90107	2.558486	7.384618	2.87225	2.870635	6.501559	5.933251	4.500864	5.089961	2.571145	5.00803	3.684292	5.535914	6.690799	3.320679	2.881053	3.453596	4.944245	5.57387
TCGA-BR-8286	394	0	2.712779	2.654922	3.06608	2.681612	5.154172	4.390502	4.593992	4.671975	3.923056	2.759422	2.763897	2.903421	7.638784	2.325238	3.21635	5.607148	5.861207	5.697322	6.255022	2.714766	4.719339	2.895392	5.113828	7.027543	2.716126	3.171377	4.44889	5.274575	5.907895
TCGA-R5-A7ZF	259	1	2.621827	2.495238	2.926393	2.666739	4.708748	4.866964	3.735897	4.116894	2.870633	4.195315	2.662797	2.54949	6.950135	4.567908	2.760819	5.425326	6.249064	4.394695	5.647724	2.609271	4.171016	2.569137	3.09555	6.108441	2.594188	3.162067	3.156541	6.229102	5.590157
TCGA-D7-6815	486	0	2.665834	2.476891	2.864554	2.580288	6.192126	4.325151	4.759907	4.864589	4.024671	2.640101	3.398692	2.556748	7.847005	3.175746	3.054111	7.136178	6.289482	4.678593	5.384799	2.580384	4.981806	2.908627	3.674827	6.818996	2.600424	2.926675	2.660267	5.606409	6.191167
TCGA-CG-5719	31	0	2.818215	2.585255	3.230037	2.560498	4.734744	5.484416	4.387889	5.785828	3.991596	2.662477	2.68153	2.596117	8.048815	3.104394	2.902179	5.828198	6.015277	4.035862	4.389757	2.581059	5.025486	3.862561	4.483163	6.71574	2.846997	3.336527	3.291058	4.505397	5.180506
TCGA-RD-A8NB	513	1	3.330141	2.764098	3.08638	2.579432	6.063907	6.552556	4.768857	5.168148	3.436208	2.664355	2.777066	2.72478	8.01175	3.669561	3.0231	6.582709	6.502441	5.054718	5.286772	2.579982	5.219504	3.267509	5.298831	6.570494	3.398541	3.678286	3.500307	6.161024	6.001846
TCGA-BR-A4IV	411	0	3.480874	2.754297	3.529539	2.66579	5.532002	6.03558	3.895502	5.76131	4.230903	2.751875	2.951536	2.569338	8.858661	3.16792	2.857939	7.784498	6.924878	2.731364	4.626241	2.599237	4.848398	3.310447	6.491797	6.889664	4.170291	2.972764	3.941857	4.442644	5.299473
TCGA-FP-8099	519	0	2.694469	2.58638	3.602901	2.576884	5.107647	5.655328	5.297267	4.135376	3.668075	2.66877	2.951517	2.581855	7.259331	2.643363	2.944674	6.121462	6.351998	5.101347	4.869068	2.616311	4.829787	4.24255	3.030585	6.692237	2.872258	3.031413	2.585968	5.581883	6.171024
TCGA-VQ-A94T	342	1	2.628931	2.494617	2.68631	2.675511	5.134893	5.606446	4.873146	5.142189	4.135153	2.645357	2.756913	2.634222	8.15221	3.503911	2.75965	5.425028	6.514641	4.659416	4.952001	2.577363	4.772534	3.0872	5.237776	6.878075	2.638914	2.721631	4.38469	5.179807	5.953003
TCGA-CD-8533	468	0	2.62588	2.626056	3.043178	2.805636	5.69937	4.675519	4.468014	6.508173	4.921935	2.677652	5.415185	2.653491	7.685003	5.627227	2.954129	6.904349	7.0088	4.988771	5.537896	2.655701	4.037205	2.711345	4.803074	6.893497	2.604603	2.999723	3.226831	4.286605	6.608228
TCGA-CD-8530	377	0	3.307629	2.833925	3.093752	2.683384	5.209387	5.891881	4.17244	6.536123	4.582237	2.680279	2.906795	2.618075	8.170876	2.908613	3.04633	6.760378	5.939338	4.162212	4.762016	2.615445	4.678115	3.210295	4.839322	6.906876	2.875038	3.011478	2.783518	5.097714	5.527293
TCGA-VQ-AA68	1219	0	2.629363	2.476891	2.857917	2.560498	5.288622	4.060977	4.426139	3.795939	3.598249	2.642902	2.766827	2.542027	8.091638	2.489303	2.783209	7.092242	6.904866	4.665921	5.437429	2.592396	4.649079	2.986641	4.999764	7.640072	2.635292	3.027401	3.329514	6.588217	6.521847
TCGA-BR-8677	370	0	2.704751	2.859904	3.106384	2.560498	5.52354	5.786176	4.40825	6.204805	4.517911	2.6349	3.051654	2.598075	7.869532	4.208582	3.113241	6.520423	6.287855	4.136459	4.980766	2.571145	5.099267	3.718221	4.256459	6.72628	2.769862	3.119429	2.412371	6.408078	5.972999
TCGA-HU-A4HB	477	1	3.036482	2.618937	2.864264	2.661509	5.831591	4.909158	4.382294	4.538591	3.01779	3.052149	2.758819	2.536264	6.967536	2.637621	2.929826	6.024333	5.277478	4.179075	4.619044	2.576575	4.133398	2.850524	4.749958	6.795981	2.774369	3.100892	3.512688	5.510478	5.874667
TCGA-BR-7707	385	0	2.610708	2.476891	2.772212	2.560498	4.97971	4.01774	4.599449	4.714635	2.945432	2.6349	2.667357	2.532705	7.400249	2.460681	2.803779	5.711758	5.656657	4.229217	5.391137	2.571145	5.494001	2.514364	2.802791	6.369368	2.529756	2.944432	2.382299	5.804123	5.543736
TCGA-VQ-A8P8	881	0	3.695067	2.61484	2.965362	2.578074	5.72479	4.985785	4.625837	5.360354	3.899925	2.653227	2.632566	2.532705	7.598684	2.967566	2.77019	5.808265	5.891787	4.441267	4.948205	2.571145	4.746519	2.720473	5.198116	6.692367	2.884581	2.744896	2.620401	5.121025	5.3391
TCGA-BR-8384	113	0	3.432629	3.03954	3.860886	2.560498	5.922752	6.24679	4.635956	6.045149	3.603267	2.779629	2.904749	3.165262	9.096206	3.786936	3.259747	6.51248	6.950644	3.161998	5.000322	2.614343	5.191621	3.708938	7.281075	6.940064	4.437334	3.420345	3.570589	5.286674	6.084938
TCGA-RD-A8N1	3519	0	2.91329	2.633284	3.030747	2.560498	5.896279	6.054885	4.644097	5.091552	3.025606	2.6349	2.999001	2.558112	7.285506	2.654265	4.198949	6.110313	6.014486	5.039854	4.595226	2.600216	5.016415	2.751106	4.228134	6.212036	2.795197	3.215302	3.107754	5.80234	5.985054
TCGA-VQ-A8DT	1484	0	3.023492	2.519368	2.775861	2.705161	5.297709	3.791773	4.253402	3.81452	2.767174	2.753722	2.676214	2.645747	6.881417	3.982816	3.223237	4.79501	5.337338	4.595579	5.263315	2.630174	4.70081	2.812153	3.857608	6.849302	2.748245	2.795606	2.713991	5.006291	5.230125
TCGA-BR-8487	34	0	2.641169	2.525269	4.353083	2.578931	4.634706	3.650928	3.960566	3.009275	2.861001	2.663581	2.679102	2.655883	5.539331	2.296111	3.043207	5.169915	5.593373	4.646159	4.890391	2.6052	4.226089	2.684185	2.664	6.77809	2.607807	2.6677	2.447851	5.062274	5.513288
TCGA-CD-8526	381	0	2.686845	2.579223	4.0475	3.718771	5.367758	5.089609	4.20173	6.425816	3.337004	5.174831	3.656477	2.580793	8.36765	4.659522	3.053312	6.904033	6.167754	4.520208	5.521216	2.58605	4.58274	2.951788	4.293279	7.383484	2.755504	3.187069	3.846057	5.465318	5.991176
TCGA-HU-A4H6	476	0	3.033607	2.510078	2.811287	2.560498	4.659344	4.915136	3.679221	5.439797	3.302205	2.637541	2.663778	2.535781	6.875386	3.057811	2.824532	4.921143	5.485616	4.110724	4.253873	2.599045	4.241079	2.545587	3.976013	6.108691	2.79109	3.091387	2.964844	4.961107	5.086691
TCGA-BR-7957	276	1	4.482587	2.938763	3.319656	2.560498	5.917312	6.45415	4.477486	5.964127	4.131566	2.733316	3.082868	3.061891	8.638019	3.278491	2.926678	7.010338	6.848613	4.450403	5.213154	2.602836	5.132927	3.727302	5.633266	6.955951	4.092615	3.221169	4.529454	5.555712	5.949507
TCGA-BR-6452	1055	0	2.711467	2.533402	3.523061	2.5778	5.798379	4.872025	5.28069	4.574196	3.735436	2.6349	2.705086	2.54851	7.79587	3.611069	3.387189	6.48218	5.578758	5.258123	5.487275	2.579217	5.369904	3.321358	4.794515	6.780601	2.589441	3.295796	2.50746	5.218197	6.185483
TCGA-BR-8592	191	1	3.686915	2.967374	3.640457	2.560498	5.753987	5.957018	3.967551	5.625924	3.983346	2.824324	3.010977	2.61639	8.524147	3.430355	3.245754	6.536771	6.677896	3.631681	5.304848	2.577155	5.022879	3.511172	6.785162	6.651779	3.722153	3.435272	3.43629	4.805724	5.845537
TCGA-D7-8573	593	0	2.719856	2.623308	3.066434	2.610007	5.600897	3.795034	4.378482	4.359529	3.372254	2.874315	2.713593	2.747203	7.052924	2.637346	2.922189	5.035826	6.765655	4.684124	4.767022	2.654404	5.310075	2.565734	4.809696	6.958245	2.599137	3.188031	2.438886	5.249264	6.147647
TCGA-D7-A6F0	90	0	2.620158	2.594275	3.499045	2.575321	5.616292	3.785494	4.615031	6.66935	4.282512	2.889151	2.737681	2.572854	8.900484	6.361074	3.404831	6.792529	6.085554	5.161406	5.757667	2.612048	4.473526	2.688095	5.480756	8.226129	2.544757	2.878651	3.806204	5.229853	6.050694
TCGA-HU-8238	46	0	2.85026	2.671018	2.759588	2.592896	5.125334	4.596334	4.101248	4.253826	3.103955	2.766724	2.642844	2.733861	6.725311	3.6342	2.986002	5.108634	5.244556	3.853696	3.778368	2.666562	4.793006	2.641294	3.738198	6.335158	2.608757	3.127868	2.575795	5.063671	4.916574
TCGA-VQ-AA6A	1002	0	3.079193	2.500003	2.840641	2.783802	6.554157	5.979358	5.243645	4.327962	3.55107	2.639471	2.711594	2.559086	8.157705	3.281239	2.862355	5.69786	6.300689	5.234435	4.778652	2.579266	5.055407	2.706618	5.49032	7.458444	2.686649	2.762445	3.599282	4.618815	6.82369
TCGA-BR-8081	625	0	2.616758	2.545555	2.862171	2.602358	5.48147	4.270779	4.388324	4.416175	3.296988	2.660522	2.703105	2.674794	7.083127	4.609512	2.990462	6.149671	5.482274	5.014076	5.087581	2.590785	4.498586	2.871144	3.271016	6.12685	2.636174	3.435719	2.505897	5.785299	5.828128
TCGA-VQ-AA6G	792	1	2.694028	2.482345	2.671877	2.560498	6.161737	4.13778	4.819686	4.431385	3.853439	2.6349	2.654397	2.552517	7.644827	2.427286	2.806556	6.595382	6.241988	4.555074	5.081968	2.593817	5.164542	2.745099	4.227276	6.826505	2.665406	2.888976	3.053192	4.933624	6.243399
TCGA-BR-8686	477	0	2.848857	2.659584	3.433435	2.560498	5.793252	5.050427	4.837967	5.596218	3.753183	2.6349	3.103102	3.018242	7.97069	2.72301	3.895701	5.369712	6.335371	3.821319	4.483677	2.571145	4.878692	2.830815	5.433294	6.591814	3.042908	3.133907	2.978366	5.541049	6.173966
TCGA-VQ-A94O	640	1	2.720746	3.069673	2.731984	2.870309	5.699837	4.363036	4.259196	6.779988	3.716171	2.708882	3.219387	2.579566	8.486345	3.608538	2.888562	6.922308	6.151544	4.956635	6.049865	2.59823	4.831933	2.576697	5.501254	7.101446	2.653994	2.898362	2.846937	5.193342	5.789551
TCGA-FP-8211	413	0	2.802638	2.525077	2.83277	2.560498	4.351002	5.257499	4.361519	3.953398	3.34046	2.638118	2.665985	2.543913	7.155994	2.455398	2.913439	5.44954	6.755127	4.471841	4.969684	2.588221	4.432791	2.930325	3.512993	5.863177	2.646216	2.682004	2.74429	5.261219	5.3278
TCGA-BR-7197	280	0	2.814846	2.492757	2.858489	2.576385	4.558435	6.24331	3.893568	5.275215	3.640413	2.643222	2.70865	2.561548	7.607213	4.70017	2.765996	5.469664	6.03478	4.323004	4.915225	2.58592	5.401514	2.811358	4.169632	6.236423	2.983422	2.661686	4.997208	4.482987	5.749949
TCGA-FP-7735	106	1	2.614839	2.503829	2.800545	2.560498	4.760087	5.123781	3.730358	5.581888	3.489775	2.6349	2.651025	2.550375	7.305484	2.932043	2.839159	4.973841	5.534885	3.517375	4.61069	2.581971	5.415031	2.575206	4.332076	6.708648	2.581412	2.805529	3.445939	4.504629	5.154178
TCGA-D7-A6EY	348	1	2.667046	2.526379	3.14929	2.560498	5.653577	4.730136	4.788189	4.607454	3.104553	2.679254	2.704857	2.552378	7.729781	4.40864	2.962034	5.957213	6.032169	4.924211	4.985708	2.571145	5.259437	2.862371	4.775965	6.836978	3.297889	3.641838	2.937674	6.267029	6.055086
TCGA-BR-8678	351	0	2.665738	2.615893	2.752914	2.622609	5.355211	5.135237	5.200515	7.42752	3.218477	2.662261	2.93949	2.551948	8.165954	6.476438	2.912403	6.083309	6.504304	4.905953	5.427284	2.666148	5.147669	2.944526	5.816332	7.00136	2.635896	3.340373	2.860639	6.55628	6.61443
TCGA-BR-8680	481	0	2.694835	2.567454	2.824876	2.603403	5.330348	3.733415	4.221816	4.990323	3.275256	2.772608	2.734837	2.744527	7.211217	3.820562	3.090853	7.453088	6.151865	4.347881	5.612401	2.659276	5.014974	3.368455	3.089905	6.436235	2.576821	2.795656	2.797583	4.460031	6.436842
TCGA-BR-8295	67	1	2.780386	3.436061	3.396986	3.359268	4.624666	4.930685	2.895968	5.677838	3.944322	4.786034	2.903302	2.859257	8.639037	2.464737	3.375127	6.361303	6.127148	4.21655	4.672608	2.813191	4.064137	2.696188	4.725946	6.641791	2.556792	3.22573	3.625307	4.009305	5.815304
TCGA-D7-8578	643	0	2.783685	2.571253	3.029543	2.812063	5.674687	5.375525	4.289079	5.712941	4.013922	2.748212	2.766406	2.704583	8.175255	3.070062	3.027504	7.142506	6.35453	3.851007	4.613529	2.680906	4.608855	4.562828	4.82375	6.955348	2.930976	3.101486	3.678196	5.026849	5.724018
TCGA-R5-A7ZI	2267	0	2.628263	2.492395	3.256393	2.560498	4.555441	4.891165	3.786611	3.892301	2.930238	2.647071	2.638672	2.532705	5.608458	4.786063	2.865977	4.024368	4.50279	4.082091	3.766637	2.603396	4.328096	2.626579	3.499111	5.406172	2.56413	3.051405	2.395842	5.222029	4.96772
TCGA-FP-8209	1811	1	2.885555	3.028533	3.869796	2.560498	6.126709	6.556659	4.834242	6.27121	3.790108	2.825649	3.102564	3.163956	9.140033	3.599006	3.110464	6.586778	6.978476	3.226043	4.978589	2.652084	5.666776	4.017405	7.05567	6.784378	4.211375	3.604175	3.9538	5.489234	6.179533
TCGA-D7-8574	523	0	2.630449	2.677004	3.195437	2.57875	5.675213	5.459013	4.561763	5.39843	3.456234	2.644464	3.114237	2.699136	7.360605	3.071577	3.388789	6.167526	5.902832	3.642595	4.684903	2.571145	4.414655	3.13567	3.368873	5.818169	2.657972	2.978756	2.493259	5.324877	5.709186
TCGA-D7-5577	376	0	2.629401	2.525026	3.098261	2.560498	5.104843	3.620162	4.288437	3.815403	3.601189	2.660308	2.691518	2.554989	7.209192	2.30272	2.787014	5.240338	5.692608	4.261635	4.399492	2.571145	5.032952	2.615644	4.486469	6.262443	2.529225	3.057572	2.398304	5.879514	5.758089
TCGA-R5-A7O7	1389	0	2.708	2.588442	2.914586	2.60994	4.554804	4.13009	4.25403	4.771367	3.828996	2.740777	3.023062	2.822925	6.950788	2.304396	3.127171	5.681506	4.884174	4.132681	4.191583	2.824741	3.68132	2.867089	4.001332	6.154846	2.586807	3.134013	2.613108	4.030993	5.218506
TCGA-RD-A7BS	336	1	3.275537	3.107115	3.091501	3.358394	4.74885	4.885953	3.732349	4.278715	3.999707	3.283967	3.53542	3.116796	7.018724	3.106865	3.147522	6.020342	5.884326	3.970878	4.737452	3.221717	4.316263	3.213533	4.225184	6.65994	2.823953	3.263203	3.03304	5.614768	5.098792
TCGA-BR-6709	370	1	2.645972	2.520034	3.036567	2.560498	5.058135	5.529363	4.859244	5.446168	3.107208	2.641784	2.750541	2.532705	7.866749	5.34561	3.18874	7.669203	5.869632	3.691594	4.637698	2.607464	4.428526	6.268992	6.408758	6.843425	2.590306	4.740142	3.306631	5.928042	5.836586
TCGA-MX-A666	427	0	3.151051	3.096861	3.312522	2.899964	5.841735	5.919397	4.642947	6.496275	3.512104	4.396768	3.512574	2.543046	7.988923	5.734195	3.003587	5.706361	6.135494	4.777342	4.829588	2.594707	4.663563	2.5635	5.365576	7.026972	2.726078	3.043516	3.049949	4.957201	6.349964
TCGA-BR-A44T	382	0	3.203556	4.199295	3.209494	2.560498	5.037104	5.244915	3.78229	4.313016	3.331366	2.826129	2.794959	2.728165	7.436553	3.794227	3.645094	5.48872	5.916033	3.283537	4.623419	2.609589	4.209763	2.832583	5.544441	5.766424	3.623186	2.826271	3.131563	5.248331	5.275753
TCGA-CG-4444	1431	0	2.723268	2.576111	2.71401	2.560498	5.414956	5.129248	4.905332	4.447604	3.587675	2.644456	2.830472	2.654629	7.511452	2.412319	2.976496	5.728381	6.086289	4.266373	5.969357	2.579655	4.353429	2.691651	3.563836	6.703061	2.552675	3.480008	2.410467	4.949609	6.011646
TCGA-BR-7851	378	0	2.667332	2.586147	3.550761	2.560498	6.062013	4.544773	4.551853	4.783274	3.33212	2.658376	2.763793	2.543728	7.303764	2.419714	3.389855	6.314744	5.993409	5.33932	5.158031	2.58794	4.957157	2.569311	4.077513	6.990425	2.892989	3.218668	2.597452	4.539249	6.349223
TCGA-BR-8591	409	0	2.856916	2.558911	3.962508	2.560498	5.772496	4.424219	5.057967	4.962586	3.539581	2.643229	2.670184	2.585081	7.783864	2.453878	2.860175	6.089755	5.991445	4.620744	5.834627	2.571145	4.961634	2.896028	4.254759	6.617123	2.921518	3.373413	2.907208	5.974933	6.136328
TCGA-D7-A6EV	342	0	2.625172	2.504538	2.762181	2.560498	5.731112	3.628019	4.436592	4.190854	3.11289	2.6349	2.736067	2.537812	7.250023	3.919801	2.798486	6.629367	6.229862	5.375797	5.677017	2.571145	4.75951	2.740026	3.747299	7.511864	2.691061	2.755472	3.008147	5.326732	6.326436
TCGA-R5-A805	281	1	2.839	2.494277	2.757574	2.636928	5.241304	4.477944	4.998618	4.846479	3.958843	2.638332	2.646367	2.544655	7.542243	2.300015	2.931862	6.46832	5.467161	4.085437	4.717011	2.577243	4.745845	2.936911	5.187316	6.311393	2.627447	4.347497	3.316935	4.933054	5.18744
TCGA-VQ-AA6F	1646	0	2.761243	2.552907	2.867051	2.560498	5.30054	5.317219	5.337795	4.360473	3.461793	2.641747	2.655603	2.540681	7.793175	4.380012	2.889167	6.40524	6.381079	4.325933	4.529955	2.583304	5.71387	2.683365	5.008612	6.633497	2.80957	2.776425	2.579652	5.208962	5.963247
TCGA-BR-4256	284	1	2.922363	2.789077	3.00555	2.560498	5.436158	5.000311	4.702547	4.769716	3.67038	2.779865	2.689562	3.031238	8.276111	2.532355	2.875878	6.990776	6.389713	4.229986	5.17536	2.593259	4.943581	3.153693	4.755796	6.963103	4.698054	3.963291	3.734933	6.057349	5.780808
TCGA-CG-4443	912	0	2.646262	2.643542	2.905752	2.560498	4.534531	4.717801	4.7252	4.790915	3.24825	2.669676	2.766699	2.628788	7.919607	4.136647	3.091236	4.773523	6.953522	3.453268	5.510102	2.606634	5.184685	3.0277	3.942843	6.057591	2.569483	2.773194	3.269254	4.574378	5.086772
TCGA-CG-5718	1095	1	2.625624	2.501187	2.915372	2.560498	5.177574	5.237817	4.026668	4.435562	3.291429	2.6349	2.736388	2.541652	7.297386	3.27932	2.875173	5.679599	5.807387	3.741134	4.124554	2.571145	5.236535	2.62815	3.441576	5.646231	2.660838	3.500915	2.511587	4.395582	5.247127
TCGA-BR-6455	399	0	2.935946	2.541466	2.811255	2.596306	5.352011	5.056798	4.908985	5.093436	3.468381	2.653708	2.677713	2.591998	7.387822	3.833172	2.964704	5.189396	6.204221	5.454118	5.471508	2.571145	4.95711	3.065281	3.53806	7.586095	2.68061	2.911443	2.433936	5.688502	6.104108
TCGA-VQ-A8P5	235	1	3.025817	2.94065	3.045156	2.973986	5.18273	5.507165	4.127873	4.550734	3.737134	2.897437	3.698983	3.025707	8.245847	4.076414	3.428762	7.360197	6.234025	4.412438	5.357085	3.09608	4.765753	3.426236	3.408822	6.657378	2.719269	3.224149	3.094831	5.854462	5.789575
TCGA-BR-A4PF	35	0	2.612831	2.500837	2.739069	2.560498	6.080075	4.666502	4.7155	3.986593	2.99991	2.638061	2.660841	2.536387	7.440013	2.404438	2.870427	6.292125	5.999568	4.788963	5.423515	2.576763	4.631999	2.573969	3.112155	6.240927	2.684583	4.049506	2.986533	5.951386	6.034789
TCGA-VQ-A94R	1294	1	2.630709	2.62798	3.035502	2.560498	6.331073	4.915237	4.684179	5.068029	3.633698	2.668299	3.094484	2.727948	7.912157	2.425691	3.093628	6.445757	6.060474	5.791924	5.587829	2.571145	5.047956	3.181591	4.582854	6.864572	2.653148	2.9115	2.821033	5.323322	6.209491
TCGA-D7-6519	625	0	2.631484	2.493529	3.006829	2.560498	5.188387	5.555962	4.112158	4.198755	3.651167	3.261828	2.730168	2.698789	7.465182	4.551601	3.433089	6.615908	7.001439	3.649363	4.373557	2.578917	4.710212	3.402756	4.963775	7.426874	2.561724	2.652237	4.000475	4.793898	5.122726
TCGA-VQ-A91U	52	1	2.643519	2.504837	2.710972	2.642619	5.769155	4.9393	4.422322	4.7948	3.711286	2.6349	2.80608	2.532705	7.472695	4.314775	2.829233	6.688693	6.023594	4.487236	5.832074	2.584243	4.861587	2.5598	4.506139	6.901085	2.575073	2.804966	2.405828	6.046796	5.979653
TCGA-VQ-A925	138	1	3.038998	2.51612	3.177488	2.560498	5.957279	5.412361	4.936344	4.984748	3.71012	2.6349	2.839524	2.543609	7.395931	2.622138	2.959484	5.872814	6.327321	4.951181	4.610497	2.571145	4.811429	2.8036	5.301007	7.699887	2.786999	2.655243	3.060663	5.296912	5.641609
TCGA-BR-8372	583	0	2.706758	2.610632	2.903421	2.577507	4.711774	4.164464	3.983914	3.196789	3.170184	2.720389	2.749686	2.829564	6.517108	2.347773	3.170675	5.607851	5.674099	4.745364	5.90084	2.648291	4.277411	2.675317	4.088873	6.635508	2.883605	3.149361	2.80378	5.838513	6.222227
TCGA-F1-6875	2197	1	2.609205	2.528183	2.725999	2.693123	5.22931	4.018469	4.243015	6.756337	2.981418	2.692633	4.763807	2.569464	7.862602	3.301375	2.780429	5.718015	6.395942	3.82987	4.978644	2.579265	5.976345	2.569368	2.902464	7.720556	2.602571	2.717288	3.197488	4.629874	6.05258
TCGA-FP-7916	428	1	3.035968	2.5633	3.129498	2.560498	5.513067	4.80527	5.035408	5.175542	3.857123	2.639306	2.725298	2.640617	7.934364	2.432504	3.158364	5.976252	6.461614	4.254344	5.343187	2.602163	5.422808	2.988001	4.256915	6.801038	2.73475	3.516267	2.609539	5.755939	6.109901
TCGA-VQ-AA6D	521	0	2.629371	2.517105	2.798942	2.580832	5.099848	5.867677	4.707465	4.188258	3.315389	3.283727	2.699854	2.551281	7.797073	3.059947	2.789404	7.453499	6.116635	4.972626	4.694544	2.580638	5.106188	2.983624	4.479634	6.799936	2.673546	3.094018	3.438041	5.14605	6.355873
TCGA-BR-8589	481	0	2.711284	2.652509	3.308341	2.616569	5.472856	4.006829	4.688975	4.441232	3.195086	2.944705	2.752288	2.889993	6.937964	2.230942	2.895168	4.699346	5.948518	4.923317	5.351335	2.597538	5.387367	2.736294	4.239967	6.681841	2.532385	3.333751	2.629237	6.169949	6.194323
TCGA-3M-AB46	1765	0	2.614919	2.488624	2.792542	2.560498	4.269635	4.384436	3.941806	4.389012	3.894211	2.6349	2.659637	2.532705	6.427638	3.275858	2.770188	6.649239	5.561242	4.516369	5.074041	2.592893	4.15603	3.217662	4.008214	5.455812	2.546645	2.639493	2.952876	4.788557	5.333507
TCGA-CG-5734	243	1	2.753724	2.484477	2.665791	2.560498	4.82409	4.132069	3.914508	4.269882	2.94471	2.6349	2.629926	2.539639	6.596767	2.682016	2.726072	5.514892	4.355528	3.185058	3.784809	2.581718	4.11044	2.519779	4.047638	5.918755	2.660225	3.223707	2.552277	4.453193	4.959969
TCGA-VQ-A924	1686	1	2.703963	2.549011	2.775755	2.588188	5.614504	4.347391	4.618811	5.800672	3.148757	2.684785	2.75836	2.582757	6.929683	5.18645	2.965821	5.906834	5.913111	5.102705	5.605111	2.634576	5.32316	2.586321	3.471401	6.916713	2.810246	3.120351	2.423934	5.85884	6.017165
TCGA-BR-8683	300	1	2.735907	2.636554	3.112339	2.6744	6.334488	6.096007	5.061405	5.730813	4.586195	2.783701	5.005055	2.902446	8.6388	3.893432	3.118083	7.114377	6.912487	4.492531	5.176682	2.702712	5.526562	4.010309	5.616582	7.361998	3.306775	3.18067	3.604222	6.460302	6.526065
TCGA-VQ-A8PK	543	1	2.667225	2.490419	3.976018	2.560498	6.238935	5.614823	5.005803	4.694542	4.026936	2.6349	2.865817	2.587354	8.377747	3.795635	3.041397	6.567381	6.704388	4.836899	4.567103	2.580603	4.529353	3.460459	3.266707	6.972842	2.686455	2.968942	4.143305	5.140773	6.152563
TCGA-R5-A7ZE	554	1	2.608573	2.476891	2.665761	2.560498	4.712799	4.150766	3.411563	5.199797	3.03687	3.086636	2.951992	2.537038	7.121874	5.215174	2.726072	5.759985	6.034174	4.337399	3.903334	2.577754	4.266625	2.66963	4.072454	6.349416	2.56487	2.730179	2.54043	4.634919	5.155099
TCGA-D7-6522	566	0	2.624661	2.771389	2.886919	2.560498	5.331806	5.046399	4.372145	5.413275	3.213459	2.704125	2.825826	2.793536	7.599519	2.867653	3.665099	5.598994	5.154979	3.964587	3.885236	2.571145	4.557805	2.834337	3.186045	6.209492	2.555552	3.387463	2.490403	4.535464	5.277755
TCGA-D7-6822	375	0	2.655463	2.519771	3.095385	2.766858	5.493455	6.986638	5.150335	6.706412	3.439308	2.639792	3.596142	2.549716	9.547781	5.059943	3.046052	6.481048	6.418516	5.242039	5.487007	2.579836	5.259418	2.682889	6.98919	7.309514	2.660756	3.900091	4.041387	5.110178	6.565574
TCGA-BR-6803	397	0	3.951519	2.699603	3.256238	2.560498	5.325933	5.753074	4.154917	5.366191	3.968255	2.776244	2.779099	2.654704	8.053802	2.71403	3.571101	5.644902	6.129913	3.519762	4.262628	2.580469	4.970829	3.480607	5.69599	6.704664	3.988148	2.88662	2.905261	4.413334	5.399229
TCGA-BR-8483	164	0	2.610037	2.526635	2.73758	2.560498	4.425816	5.747225	3.528119	5.199918	3.025307	2.663014	3.101941	2.591035	6.993551	5.068391	2.881451	5.478466	6.373779	4.475229	4.765212	2.581254	3.615036	3.555731	3.113322	6.419153	2.543946	2.602432	2.931699	4.599343	5.068698
TCGA-BR-6563	1190	0	2.957736	2.791144	2.909091	2.560498	5.011342	4.910507	4.160678	5.150196	3.420405	2.658569	2.74504	2.591027	7.262325	2.862004	3.145849	5.889035	5.500424	2.773336	3.923499	2.571145	4.194505	3.099849	3.865621	6.122324	2.894227	2.851095	2.689374	4.735704	5.034044
TCGA-VQ-A8E7	787	0	2.620101	2.534662	4.022519	2.560498	6.049637	4.174785	4.202922	5.379988	3.693569	2.827148	3.106479	2.581397	7.609263	2.316825	2.867834	5.781577	6.343361	4.100481	5.261819	2.598455	5.283633	2.919946	4.054645	6.964473	2.567096	2.936236	2.55626	5.425891	6.223076
TCGA-CG-4436	243	0	2.627319	2.481554	2.64731	2.560498	4.883774	4.957668	4.185398	3.762561	3.187678	2.65305	2.716342	2.536967	7.297932	4.427852	2.75249	6.570558	5.730715	4.962862	5.444819	2.577646	4.561075	2.48006	3.640769	6.056668	2.531879	3.648831	2.386077	5.346175	5.39078
TCGA-D7-6520	573	0	2.675159	2.99235	4.692584	2.596997	4.920488	4.905832	4.401304	4.680467	2.937176	2.649317	2.67252	2.549504	8.37186	2.356702	2.827358	7.389467	5.83623	4.456131	5.073127	2.579727	4.937009	3.781386	4.633133	6.319564	3.015133	2.765443	3.186812	5.058332	5.706718
TCGA-BR-8676	229	0	2.871846	2.596242	2.789168	2.560498	4.051146	3.305051	3.513994	4.154793	2.741252	2.648962	2.62329	2.532705	6.399105	2.309607	2.986533	4.410501	5.816742	3.818865	5.687285	2.620532	3.396567	2.51735	3.416569	6.206257	2.531145	2.796124	2.555374	5.24553	5.431936
TCGA-BR-6457	356	0	3.554894	2.66776	3.307324	2.560498	5.110196	5.374524	4.12034	5.637714	3.709962	2.702773	2.895685	2.805076	8.189879	3.14143	3.099523	6.196968	5.956709	4.222479	4.569147	2.571145	5.01688	3.648902	5.337577	6.653641	3.215164	2.88189	3.563251	4.228222	5.337562
TCGA-D7-A747	255	1	3.467579	2.729883	3.151221	2.927678	5.26562	5.436158	3.941967	4.302404	3.083143	2.863525	3.096726	2.928474	7.994411	3.0095	3.18599	6.295408	6.443342	3.033685	4.671973	2.80803	4.632796	3.450984	5.65065	6.096599	5.428044	2.848925	3.288142	4.790339	5.110453
TCGA-BR-A44U	422	1	2.605815	2.48128	2.664212	2.560498	3.869006	4.059004	3.626947	3.997796	3.23079	2.6349	2.665006	2.579933	6.23796	3.057366	2.882489	6.406825	5.573245	3.420108	5.388269	2.577264	4.604843	3.492575	3.037356	5.878153	3.811145	2.641535	2.401895	4.757458	4.965369
TCGA-BR-8367	418	0	2.851958	2.621577	3.448963	2.560498	6.009524	5.623361	4.81222	5.593944	4.111613	2.693859	2.821211	2.69469	8.396652	2.93934	3.563278	6.952715	6.184112	4.864211	5.380388	2.647452	5.160137	3.642521	5.828581	7.243117	3.284383	3.350179	3.075737	5.038395	6.357804
TCGA-D7-A6F2	476	0	2.676448	2.519576	2.770931	2.560498	5.095622	5.445504	4.664584	4.139912	3.107594	2.661106	2.838417	2.545897	7.199441	2.987355	3.201753	6.282827	5.663404	4.653181	5.502018	2.60445	4.966333	2.743832	3.357472	6.379502	2.668459	2.987851	2.464323	5.330106	5.601227
TCGA-D7-6521	564	0	2.946654	2.55169	3.951875	2.560498	4.645302	4.961962	4.47721	4.980607	4.394075	2.642975	2.747655	2.551442	7.4007	2.539713	3.527089	6.79028	5.979011	3.327461	4.262311	2.571145	4.492142	2.75963	6.193901	6.498415	2.647022	2.958226	3.117086	4.44289	5.042531
TCGA-CG-4466	577	0	2.69847	2.672076	2.772102	2.57826	4.989958	6.407523	4.771593	4.154411	3.720315	2.781701	2.725648	2.741264	8.181415	4.585521	3.050239	6.39882	5.988983	5.006136	5.493529	2.791447	4.674123	2.72279	3.622489	6.671427	2.551578	3.126749	2.593833	4.582127	5.477082
TCGA-CD-8524	388	0	2.616837	2.55933	2.825251	2.839889	4.692546	5.341146	4.101221	5.488719	3.939837	2.720547	3.027122	2.778572	7.843602	4.139643	3.081987	6.067597	5.981469	4.239522	4.712373	2.597449	4.370386	4.271421	4.871794	7.494941	2.586197	2.698109	2.855579	5.40754	5.67231
TCGA-BR-7723	564	0	2.656378	2.746847	2.922954	2.560498	5.269131	5.226109	4.684864	7.267646	3.78004	2.647534	2.707228	2.56196	10.270975	6.321836	2.974976	6.262724	6.631543	4.857609	4.327459	2.571145	4.84371	4.083631	3.93171	8.037973	2.509813	2.849882	3.975886	4.928196	6.114862
TCGA-CD-A48C	353	1	2.614384	2.506085	2.82595	2.61478	4.564842	4.817958	3.660258	3.91983	3.436653	2.646438	2.680157	2.569302	7.155926	5.249029	2.747041	6.203517	5.900979	4.197986	4.623639	2.571145	3.761619	3.837648	6.983409	7.285281	2.671251	2.70645	4.418288	4.999097	5.338157
TCGA-HU-A4GX	616	0	2.876637	2.476891	3.071245	2.560498	5.012555	5.167346	3.864982	3.689932	3.094387	2.6349	2.617436	2.535978	6.309702	5.093294	2.824303	5.335327	5.158962	4.889541	5.148846	2.571145	4.507435	2.563077	3.703187	5.528215	2.60723	2.874659	2.861518	5.655827	5.770296
TCGA-BR-8382	482	0	2.627098	2.615288	2.808306	2.560498	5.008024	4.15133	4.283813	4.396773	3.753864	2.691203	2.653046	2.57691	6.935607	4.518279	3.03325	6.077544	5.832316	3.940554	5.373239	2.571145	4.485058	2.59248	3.147947	6.146643	2.538816	3.420983	2.64079	6.256938	5.396785
TCGA-IN-AB1V	479	0	3.099701	2.534429	2.951957	2.858945	5.858683	4.566565	3.947509	3.485794	3.027241	2.845403	2.86661	2.571347	6.94644	3.243075	2.814781	5.995354	6.412546	4.161129	4.153458	2.571145	4.87588	3.219835	5.230161	6.741781	3.44383	2.766288	2.947656	4.91726	5.442524
TCGA-CD-8532	354	1	2.740687	2.638599	3.443465	2.560498	5.620767	5.025306	4.874932	4.787474	4.002234	2.661083	2.679283	2.607528	7.250887	3.182166	3.035004	5.759612	5.776927	4.264412	5.097134	2.594531	4.918977	2.817828	4.583427	6.224708	2.703152	3.031916	2.777042	5.394104	5.711757
TCGA-IN-8663	103	1	2.690705	2.514304	2.710533	2.560498	5.571433	5.160251	3.92222	4.946233	3.830946	2.681514	2.763051	2.532705	7.668741	2.739911	2.726072	5.901791	7.525213	4.446328	6.355089	2.571145	5.137017	2.726875	3.613687	7.991208	2.628982	3.071553	2.425436	7.038283	6.280089
TCGA-VQ-A91D	356	1	2.608491	2.681338	2.760775	2.560498	5.381385	4.000148	4.353795	4.202124	2.792839	2.6349	2.761225	2.545269	7.378186	2.504614	3.159254	6.125325	6.194885	4.251627	5.208574	2.590283	4.858659	3.111394	2.700412	7.60347	3.060263	3.166697	2.375934	5.457139	5.83613
TCGA-KB-A6F7	1842	0	2.668858	3.019203	3.156434	3.505924	5.674479	3.746879	4.552034	4.400723	3.078673	2.665733	2.730279	2.539985	7.961993	4.037134	3.121154	5.413693	5.85332	4.871335	4.414575	2.604147	4.624826	2.580031	4.284269	6.579329	2.743879	3.124759	3.707427	5.340469	6.094934
TCGA-VQ-A8PQ	476	1	2.64846	3.239351	3.224135	2.823476	6.212839	6.288355	5.113936	5.436945	4.269376	2.725304	2.920192	2.730477	7.867281	3.202219	4.129352	5.335604	6.902863	4.815324	5.124118	2.610699	5.383041	4.551644	4.765239	6.446285	2.770882	3.350864	3.123174	5.936335	6.391318
TCGA-B7-A5TN	287	0	2.614066	2.527883	2.992127	2.560498	4.966732	5.169734	4.656796	4.474777	4.942844	2.667845	2.751418	2.562689	7.669037	3.680011	2.846276	6.870096	6.084542	3.776957	4.578732	2.577753	5.090031	3.781044	3.280946	7.003817	2.532239	2.85354	2.627647	5.47304	5.368614
TCGA-VQ-A8E0	562	1	2.743272	2.513769	2.920203	2.574497	5.685273	4.740902	4.704215	4.533294	3.750585	2.638573	3.177454	2.553939	7.627257	5.364869	2.899912	5.892434	5.80997	4.515393	4.276373	2.584164	4.688443	2.776935	4.335127	7.317506	2.54284	3.161679	3.578419	5.314523	5.734925
TCGA-CD-5803	341	1	2.67042	2.676492	3.269816	2.588865	5.695577	5.817695	4.87269	5.713117	3.513333	2.664434	2.761791	3.620754	8.315343	3.317431	3.454713	6.430561	6.000545	3.922821	4.751066	2.571145	5.351322	3.616647	4.969774	6.80999	3.394415	3.143716	2.856941	5.836878	5.837394
TCGA-BR-8371	359	1	2.923538	2.744654	3.813996	2.560498	5.175612	5.7097	3.135716	5.081208	3.987157	2.723017	2.840563	2.622091	8.024567	3.781698	3.35349	6.359749	6.303671	2.598903	4.565835	2.615172	4.679436	3.101177	7.427208	6.913063	3.375815	2.955631	3.92131	4.792513	5.362039
TCGA-VQ-A8PU	820	0	2.702439	2.485165	2.676721	2.560498	5.454333	6.227715	4.749935	4.915316	3.574178	2.641393	2.800226	2.532705	7.275091	2.303536	2.846188	5.723067	6.591667	4.895152	5.698662	2.594102	5.184645	2.579206	5.194432	7.632671	2.567482	2.863642	2.540262	4.509838	5.808955
TCGA-HU-A4G2	739	0	2.653917	2.504767	2.893134	2.560498	4.827205	4.354189	3.713445	5.228475	4.197569	2.637666	2.65499	2.548723	7.471597	2.243695	2.79781	5.466228	5.56467	4.962019	4.983614	2.580956	4.41899	2.493878	5.068389	6.578252	2.719556	2.752246	2.487877	5.673043	5.279571
TCGA-B7-A5TK	288	0	3.144587	2.561906	2.810936	2.560498	4.705292	5.159964	4.452479	4.582751	3.157831	2.792609	2.643496	2.57452	7.578167	4.106381	2.786638	6.69721	6.75075	3.779284	5.314416	2.57763	4.767066	3.291959	4.820088	6.684273	3.070883	3.477534	3.273579	6.938735	5.490138
TCGA-BR-8690	325	0	2.70751	2.565095	3.031851	2.809057	4.373592	4.591977	3.476852	4.161134	3.165372	2.862497	2.863891	2.933848	6.425089	3.275403	3.141393	6.04348	5.349719	3.391883	5.390634	2.819501	3.807938	3.890322	3.766537	6.214145	2.570559	3.198291	2.919844	5.879557	5.506214
TCGA-CG-4440	122	1	2.609524	2.562754	2.710308	2.560498	5.306711	3.731013	4.326477	5.309812	3.221644	2.654742	2.667895	2.595206	7.647807	2.925191	3.02447	7.27794	6.759459	4.243171	4.58096	2.571145	4.499491	2.563027	3.575954	7.463811	2.524963	3.385238	4.05842	5.443898	5.920573
TCGA-BR-6802	469	0	2.878578	2.502652	2.732773	2.560498	5.673456	4.234568	4.759718	4.450515	3.435259	2.6349	2.704913	2.54848	7.340485	2.306776	3.054796	5.538509	6.108756	4.546985	4.659079	2.58321	5.670144	2.855791	3.85779	6.509953	2.626538	3.453597	2.452962	5.999069	5.750441
TCGA-VQ-A8E2	1072	0	2.859119	2.934656	3.413356	3.425884	5.650495	5.334358	4.460412	7.342745	4.516648	2.709555	6.125743	2.674445	8.677132	6.343168	3.004025	7.132239	6.678479	5.259632	4.99938	2.634019	4.905756	2.857119	6.774693	7.413109	2.707406	2.987392	3.447278	6.17713	6.272168
TCGA-D7-6818	321	0	2.628903	2.516311	4.125469	2.675374	5.391962	4.845225	4.495894	5.347857	3.766667	2.645344	2.725448	2.592294	8.019764	3.201438	2.869763	6.513611	5.715961	4.340779	5.170148	2.580448	4.524694	2.869793	3.525962	6.79065	2.873164	3.668582	4.748001	5.018035	5.743046
TCGA-RD-A8N9	1083	0	2.667888	2.820851	3.056166	2.593104	5.37979	5.587024	4.475133	5.529227	4.40266	2.697534	2.907632	2.713792	8.196998	2.834328	3.157649	6.708986	5.991522	3.925794	4.814554	2.578802	4.888132	2.736032	5.04848	7.02814	2.644023	3.086772	2.907952	5.329476	5.451948
TCGA-D7-6525	406	1	2.60979	2.490504	2.855461	2.560498	4.595948	4.25083	4.584128	5.294679	3.631175	2.640258	3.861543	2.593641	7.876913	2.750715	2.884313	5.608871	6.997545	4.245844	4.434063	2.580663	4.324408	3.928241	3.613788	7.809559	2.52604	3.074694	2.557493	6.155487	5.66287
TCGA-HU-A4GU	200	0	2.605815	2.476891	2.741832	2.574508	4.802376	4.89582	5.195425	3.445319	2.929389	2.642237	3.307363	2.541252	6.940244	2.924524	2.787064	5.791549	5.657791	4.527431	5.838924	2.571145	5.34006	2.486224	2.796057	5.988363	2.595376	2.668724	3.541115	5.099948	6.399058
TCGA-BR-8059	439	1	3.788215	2.583116	3.025802	2.560498	5.036318	5.439974	4.415482	4.962593	4.095817	2.691608	2.704953	2.635754	8.025348	2.451032	2.783795	6.798419	6.714386	3.779991	4.488041	2.579779	4.642773	3.504879	4.772759	7.077513	2.929015	2.811847	3.276918	4.083759	5.423211
TCGA-CD-8528	375	0	2.617217	2.502864	2.684352	2.560498	5.599704	4.10217	5.174984	6.131049	3.077123	2.640043	2.743336	2.585525	8.072587	4.963529	3.158678	5.936594	6.117767	4.718145	5.305005	2.580281	4.534168	2.596203	2.767482	6.835031	2.627453	3.764249	2.374508	5.282808	6.380246
TCGA-BR-6710	273	0	2.939584	2.503429	2.907577	2.560498	5.283025	4.657726	4.633483	4.230188	2.958982	2.669388	2.788058	2.540861	6.730368	2.590727	2.792414	5.595343	5.134246	3.072749	3.877982	2.571145	4.585226	2.798444	4.843624	6.026182	2.666571	2.746822	2.696764	3.836718	5.085038
TCGA-BR-8291	496	0	2.637804	2.777076	3.50402	2.560498	5.284169	6.110713	4.52443	5.166761	3.851499	2.649404	2.919607	2.786185	8.42749	3.12749	4.062541	6.62577	6.218043	4.142902	4.691967	2.613722	4.542158	3.183274	4.089474	6.748509	2.647197	3.290202	2.582304	5.180225	6.085157
TCGA-D7-6526	523	0	2.845482	2.492643	3.076408	2.560498	5.181366	4.829679	4.632181	5.779569	2.859926	2.6349	2.776799	2.537528	8.067982	3.319946	2.868094	5.155089	6.325555	4.762333	5.845461	2.571145	5.29478	2.918924	3.624218	6.692937	2.771163	3.10657	2.49423	4.913111	5.714899
TCGA-VQ-A91X	289	1	2.640061	2.486831	2.72494	2.575391	4.78646	3.270817	4.611732	5.93207	2.84049	2.65428	2.923194	2.56863	6.228241	2.317546	2.781798	4.283744	5.860827	4.531142	3.768651	2.605485	4.628607	2.509583	3.448553	6.045392	2.589689	2.66245	2.522922	4.453472	5.560454
TCGA-BR-6801	642	0	2.950729	2.500853	2.771093	2.560498	4.986705	4.516549	4.478038	4.30757	3.027304	2.649986	2.644679	2.554637	7.111735	2.77481	2.753463	5.619596	5.593756	3.638097	3.60829	2.571145	4.601538	2.72755	4.110357	5.597	3.273405	2.624065	2.79407	4.683582	4.814219
TCGA-VQ-A91V	974	0	2.962728	2.501664	2.791919	2.560498	5.351346	3.983417	4.839807	3.990663	3.401257	2.638825	2.666847	2.546365	7.431377	2.38199	2.966407	4.210636	6.131333	4.499104	4.684358	2.591947	4.609157	2.641993	4.765516	6.622203	2.643177	2.726884	3.191808	4.901771	6.063627
TCGA-CG-4460	669	1	2.873111	2.514997	3.162504	2.560498	5.229382	6.247463	4.434361	4.923931	3.935998	2.681545	2.734821	2.582266	7.589361	4.206348	2.937629	5.612543	6.285875	4.091856	5.415232	2.609214	4.050593	3.207173	5.443181	6.472864	2.522967	3.097541	4.130371	4.508655	5.611662
TCGA-B7-A5TJ	335	0	2.642722	2.499734	2.735671	2.560498	5.119592	4.334235	4.190194	4.596324	3.123693	2.6349	2.738499	2.60228	7.136625	2.52363	2.743547	4.985163	5.792506	4.288007	5.124249	2.57757	4.90877	2.595867	3.851555	6.964067	2.783541	2.639096	2.413926	4.583315	5.459248
TCGA-IN-A6RS	383	0	2.614497	2.506467	2.693776	2.560498	4.844328	4.271992	3.718434	4.51952	3.49095	2.893465	3.465886	2.532705	7.169456	4.674336	2.781866	4.973378	5.804804	4.130055	4.720034	2.571145	4.011241	2.573657	3.075952	6.016952	2.578787	2.780796	2.648069	5.578069	5.631286
TCGA-D7-A6EZ	297	0	2.632187	2.510808	2.987134	2.560498	5.33446	4.038372	4.476	5.185286	3.322623	2.6349	2.68641	2.543155	7.322021	4.794984	2.779557	5.765782	6.190286	4.576292	5.64782	2.594953	6.142607	2.515273	2.857874	5.899241	2.509813	3.507182	2.37102	6.511018	6.013353
TCGA-BR-7717	552	1	2.749795	2.52773	2.774254	2.560498	4.489569	4.213289	3.911234	5.365196	3.71229	2.6349	2.674933	2.553665	7.272662	2.403277	2.790424	5.461269	5.253185	3.833364	4.335169	2.571145	4.411174	2.793948	4.156103	7.235366	2.685169	2.748317	2.955316	4.955989	4.880005
TCGA-CD-8527	218	1	2.668886	2.566256	3.219856	2.560498	4.469915	3.869816	3.362633	4.094876	3.008151	2.687076	3.070167	2.609617	6.750027	4.594826	2.951243	6.269749	6.448649	3.888568	4.154175	2.571145	4.409991	3.262699	3.547212	6.496166	5.071425	2.760034	2.811544	5.757001	5.190264
TCGA-IN-A6RR	205	1	2.933005	2.641755	2.841869	2.614705	4.760326	3.904083	3.576964	4.192197	4.865281	2.814477	2.819931	2.650243	6.796343	2.61857	3.041846	5.190671	5.943081	3.29061	4.137842	2.670149	3.769729	2.686446	5.096342	6.669419	2.658663	2.803765	3.314562	4.990856	5.56599
TCGA-RD-A8MV	3720	0	2.664207	2.607915	2.805859	2.591139	5.546999	4.157218	4.401688	4.318413	3.184721	2.650983	2.77328	2.542114	7.399964	4.200259	3.100597	5.043684	5.38276	4.910463	4.642183	2.578336	5.130919	2.561689	4.023815	5.97219	2.647048	3.752312	3.315896	6.351443	5.656342
TCGA-BR-8484	766	1	2.871637	2.614016	3.291598	2.560498	5.702485	6.173672	4.441805	5.027996	3.819218	2.663201	2.790485	2.701339	7.605004	4.996779	3.301068	7.016071	5.983471	4.942069	5.365679	2.571145	4.723675	2.867951	4.038308	6.639646	2.59336	3.349403	2.81508	5.605012	6.237437
TCGA-HU-A4GC	99	0	2.865301	2.499616	2.694782	2.560498	5.183145	3.899404	3.515159	3.908107	3.387662	2.649796	2.678444	2.626679	7.154575	2.348454	2.789935	6.074118	5.197683	4.50264	5.332683	2.576474	3.790056	2.663325	4.066472	6.248284	2.637531	2.732285	2.72198	4.597893	5.161214
TCGA-CD-5799	99	0	2.654326	2.495052	2.834863	2.560498	4.844923	4.919736	3.313198	4.718362	3.305884	2.6349	2.684574	2.53827	6.791518	2.751806	2.760469	6.230883	5.568706	4.060344	4.20325	2.579632	4.454566	3.016132	3.158742	6.258	2.619568	2.659141	2.738387	4.894469	5.197405
TCGA-HU-A4H0	64	0	2.695903	2.499798	2.983161	2.574319	5.415976	4.836254	3.986885	4.812402	3.077618	2.638526	2.686961	2.532705	7.344192	2.239326	3.099103	4.486847	6.687137	5.355214	5.760042	2.577588	5.521146	2.544236	4.492928	6.739497	2.623996	2.869836	2.385732	6.583857	6.321526
TCGA-VQ-A91Q	633	1	2.700723	2.608327	3.546932	2.560498	5.469273	7.568734	5.08766	5.233828	4.39491	4.24316	3.122797	2.641151	8.363587	5.253298	2.764959	6.88214	7.025061	4.879014	5.354068	2.606804	5.332755	4.211957	5.137365	6.913906	2.689032	2.976953	3.206414	5.433915	5.943271
TCGA-CG-4441	426	1	2.617881	2.487279	2.780087	2.560498	5.403104	4.755139	4.818586	4.446519	3.662037	2.638986	2.647045	2.537464	7.679626	2.95173	2.866321	6.669091	5.445081	4.904521	4.561887	2.592795	4.970503	3.166588	4.849409	7.293282	2.604446	3.779642	3.072378	4.440346	5.753371
TCGA-BR-4279	291	1	3.933978	2.700148	2.781779	2.560498	4.419385	5.412429	3.805485	4.528831	3.684372	2.720355	2.641334	2.90547	7.865125	2.433398	3.216408	7.216801	5.90763	3.55541	4.619952	2.585529	3.477031	4.231541	4.389553	6.278582	2.920292	3.153826	3.223672	4.304957	4.983054
TCGA-IN-A6RJ	379	0	2.658523	2.507467	2.738158	2.650174	5.179031	3.89136	2.685195	3.271549	2.801022	3.513209	2.721702	2.542115	5.968445	3.199594	2.726072	5.10828	6.357892	4.115217	3.695802	2.585486	4.672084	4.492446	4.479949	5.864622	2.688506	2.864637	2.452099	4.996669	5.025922
TCGA-VQ-AA6J	642	0	2.631521	2.585086	2.704289	2.560498	5.407304	5.644672	4.914968	4.916827	3.565829	2.641266	2.896371	2.54381	7.699025	2.737002	2.885165	6.348325	6.675547	5.160058	5.675071	2.58245	4.883386	2.540663	4.1027	7.275946	2.63664	3.079232	3.801407	6.342233	5.906475
TCGA-CD-5800	400	0	2.859302	2.542706	3.140587	2.766073	4.97635	4.790196	4.124082	6.651671	3.221761	2.6349	4.680995	2.563323	7.396066	4.8408	3.187975	5.127425	5.741436	4.607012	4.738581	2.626724	4.94863	2.5685	4.476899	6.688838	2.645184	2.810622	3.229191	4.644553	5.741556
TCGA-CG-4465	274	1	2.619127	2.488353	2.716057	2.560498	5.910163	4.505653	4.563966	3.862886	3.267999	2.639409	2.66865	2.613981	7.400392	2.261851	3.057278	7.084171	5.945595	4.755764	5.404985	2.571145	4.265332	2.522614	2.797659	7.120591	2.58886	3.250598	2.633311	5.120621	5.803735
TCGA-CG-5720	30	1	2.608999	2.514598	2.721251	2.560498	5.572288	4.433078	4.339732	5.238175	3.159914	2.6349	2.648728	2.581749	7.066167	2.334608	2.767146	5.028132	5.163413	4.33005	5.066054	2.571145	4.982305	2.693876	4.117675	6.571154	2.608995	3.62793	2.369921	4.915694	5.352146
TCGA-D7-6524	543	0	2.965939	2.529193	2.85998	2.560498	5.725254	5.373756	4.89174	6.283619	4.251773	2.667057	2.719556	2.548922	8.645035	3.4006	2.914116	7.084791	5.991674	4.376135	4.919639	2.579429	5.334065	2.588651	5.57219	6.932839	2.942049	4.197753	2.553449	4.871817	5.474611
TCGA-CD-A486	104	0	2.60777	2.506765	2.942814	2.600253	4.805187	4.515784	4.34496	4.82679	3.235358	2.803536	3.654608	2.577942	7.272456	5.133922	2.973182	6.304738	5.570625	3.853576	5.103338	2.589788	4.505808	3.902964	3.596605	6.358293	2.69132	3.496376	3.997868	5.106701	5.231738
TCGA-RD-A7BT	262	1	2.677962	2.504493	2.693516	2.560498	4.698432	3.445242	4.26569	4.69724	3.150923	2.647971	2.796593	2.532705	6.962548	4.813256	2.757622	6.643613	5.774074	5.072014	5.216791	2.571145	4.55871	2.558744	3.829819	6.404352	2.71238	2.813847	2.694823	5.293675	5.754033
TCGA-IN-A7NT	323	0	2.61546	2.525742	3.037505	2.74556	5.305042	6.119254	4.377242	4.231592	3.263032	2.745713	4.928375	2.562766	8.103004	5.401334	3.936956	6.67166	6.323342	4.203495	4.579536	2.594179	4.33728	3.13015	6.542759	6.226648	2.622017	3.400848	2.624477	5.776976	6.034466
TCGA-BR-8296	474	1	3.255579	2.860394	3.463456	3.046258	5.017618	5.237223	5.035937	4.989907	4.089435	3.158056	2.888898	3.199888	7.422877	2.677227	3.723119	5.915343	5.458328	4.498227	4.160579	3.085265	5.244615	2.926027	4.155346	6.742006	2.797003	3.843501	2.983318	5.359348	5.680385
TCGA-BR-4187	141	1	3.51155	2.923534	3.036807	2.560498	5.186798	5.584467	4.15608	4.765464	4.023197	2.707011	2.675488	2.83009	8.354065	2.743862	3.137757	7.258288	6.732069	3.259838	4.746234	2.57853	4.301146	3.204431	4.990825	6.777227	3.152265	3.536205	3.381527	4.371651	5.27032
TCGA-BR-6705	421	0	2.753693	2.853185	3.354575	2.560498	5.639302	5.868117	4.267436	6.694833	4.40505	2.72166	3.211705	2.835477	8.653055	3.177139	2.977412	6.525515	6.269028	4.143277	4.193183	2.600199	5.180172	3.806344	5.023942	7.186751	3.317062	2.927496	2.603428	4.590193	5.722876
TCGA-BR-A4QL	352	0	2.694259	2.500624	2.740277	2.560498	4.557234	4.129758	2.773562	3.250627	2.73094	2.641934	2.701923	2.543618	5.186351	4.761338	2.835074	5.063852	5.002795	4.515477	5.245628	2.579486	3.955782	2.618412	2.748931	5.518018	2.611402	2.612929	2.619654	4.905223	5.103453
TCGA-BR-7716	468	0	2.931384	2.580919	2.957945	2.575329	5.647059	4.687924	4.912041	5.407311	3.815284	2.6349	4.051416	2.555196	7.933146	4.952767	3.161691	6.239988	6.397778	4.07812	4.226746	2.57806	4.69292	3.007855	4.161818	7.83643	2.682252	3.129149	2.878396	5.342341	5.777583
TCGA-HU-8608	641	0	2.61002	2.512517	2.981472	2.560498	6.169288	4.675005	5.496883	5.689715	3.889573	2.6349	2.727055	2.545872	7.831728	2.318871	4.436281	5.982631	5.627505	5.234776	5.358189	2.571145	5.134656	2.539921	4.187259	6.67049	2.608153	4.164354	2.530639	6.401534	6.579947
TCGA-F1-A72C	346	0	2.806135	2.521673	2.984398	2.583169	4.616571	5.643886	4.173534	4.21197	4.075137	2.646787	2.763198	2.606883	6.916965	2.52532	2.996496	6.957654	5.660472	3.999646	4.657036	2.682926	3.913105	2.767619	3.388803	6.468971	2.853711	2.858004	2.525825	6.107916	5.439288
TCGA-VQ-A8P3	988	0	2.61605	2.589975	2.878532	2.573702	4.79429	5.388376	4.00457	4.802559	3.563339	2.675632	2.781669	2.572422	6.899199	2.330001	3.422816	5.304592	5.619569	4.097798	5.148845	2.613595	4.210721	2.751454	3.501251	5.526719	2.540984	2.88781	3.58952	5.001692	5.40252
TCGA-BR-4280	201	1	2.638788	2.500644	2.691914	2.560498	5.493971	5.288074	4.047761	3.399977	2.990323	2.649854	2.762459	2.545799	6.580424	4.873465	2.788446	7.253944	5.623717	4.354587	4.746538	2.571145	4.50864	2.60055	3.038145	6.113299	2.554611	3.275288	2.406854	5.837858	5.584863
TCGA-IN-7808	105	1	2.611744	2.526826	2.801868	2.927778	5.583214	4.446594	4.201179	4.283313	2.898881	2.681837	2.966338	2.551245	6.297882	3.004102	5.123907	4.206526	5.444238	3.917049	4.402102	2.58533	4.206871	3.209574	3.398637	5.590917	2.73555	2.768797	2.960486	5.415696	5.710434
TCGA-D7-8572	511	0	2.844305	3.239066	3.134899	2.896782	5.977034	5.574674	5.296745	6.292381	3.857861	4.008733	3.541925	2.958764	8.643324	5.178991	3.801686	7.16104	6.403639	4.893534	5.373859	2.747805	4.926698	3.298543	4.502829	7.288703	3.071493	3.833166	3.184397	5.560466	6.442272
TCGA-CD-A48A	378	0	2.926192	2.700382	3.285519	2.81397	4.690836	4.860663	3.464406	3.755562	3.356991	2.905142	3.034214	3.052073	6.300591	2.402176	3.077953	5.464268	6.093802	3.505535	4.411003	2.798195	4.447298	2.867218	4.301124	6.398036	2.736957	3.143299	3.152725	4.539106	5.045597
TCGA-D7-6528	463	0	2.627336	2.495435	2.809992	2.597358	4.812261	3.794652	4.55591	5.436696	3.073107	2.677913	2.863549	2.604472	7.049989	5.113964	2.922146	6.384454	6.101033	4.559226	4.941739	2.687281	5.70705	2.538269	2.770338	6.982066	2.55345	2.925331	2.460576	6.828369	5.942107
TCGA-BR-6707	605	1	2.77007	2.525258	2.792554	2.560498	4.957876	3.996966	3.826896	5.101929	3.641015	2.6349	2.696989	2.541715	6.905588	2.425074	3.008707	5.006226	5.182455	4.589333	5.343129	2.571145	5.285894	2.94899	4.547218	6.275381	2.80883	2.834625	2.367662	5.682687	5.693717
TCGA-BR-8368	131	0	2.65457	2.559467	2.989501	2.619691	5.56814	4.18851	4.219866	4.17008	3.3147	2.739775	2.799464	2.784525	7.256497	5.221503	2.991304	5.059577	5.786476	5.454868	5.553963	2.698316	4.46974	2.739479	4.477844	6.6324	2.601598	2.985613	2.568847	5.355541	5.916728
TCGA-VQ-A92D	1752	0	2.605815	2.527916	3.581097	2.57609	6.415655	5.367025	5.2332	4.786212	4.434318	2.638993	2.722874	2.532705	7.803377	5.083507	2.774852	6.054979	6.764573	4.346004	5.002509	2.578417	4.761235	2.614081	3.159393	7.176789	2.570221	2.721181	2.422478	4.659527	6.250171
TCGA-HU-A4H2	394	0	2.759076	2.498992	2.750773	2.568848	4.889014	3.41558	4.699019	4.098054	2.963338	2.6349	2.841689	2.532705	6.736002	5.067067	2.86611	5.169297	5.597301	4.873817	4.541237	2.578908	4.497469	2.522795	3.522466	6.554339	2.685027	2.796312	2.501776	4.471657	5.55441
TCGA-BR-8361	593	0	2.626224	2.501921	4.889327	2.690075	5.214016	3.768885	4.937939	6.447676	3.584417	2.650661	3.02025	2.564655	6.909674	2.301845	3.051423	5.553345	5.482494	4.225516	4.981001	2.578191	4.633004	2.759538	3.289885	7.184448	2.579673	3.545207	2.55194	6.030636	6.275339
TCGA-VQ-A91Z	1589	0	2.612374	3.020217	3.293937	2.872744	5.643901	5.393847	4.549774	6.387558	2.850748	2.6349	4.772512	2.548113	7.60271	6.560938	2.799197	5.717958	6.080024	4.69336	5.220999	2.571145	5.763978	2.507479	5.88443	6.918745	2.670388	2.744798	2.582768	4.614303	5.802828
TCGA-D7-6527	312	1	2.72866	2.502125	3.144265	2.560498	4.80217	4.997315	4.145011	5.115102	3.335192	2.642879	2.667834	2.564914	7.201113	4.129215	2.828438	4.642786	5.438879	3.877413	3.539243	2.585312	4.299171	2.548361	4.28542	7.375869	2.75408	2.989073	2.699883	3.877267	5.121814
TCGA-RD-A8MW	1153	1	3.016503	2.567587	2.847441	2.560498	4.871418	4.612022	3.987069	4.638657	3.373043	2.726263	2.906484	2.595854	7.809334	4.684792	2.944523	6.850569	6.253407	3.735104	4.346553	2.603749	4.006527	3.357796	3.529095	6.941206	2.734044	3.267109	3.35169	5.383301	5.371413
TCGA-D7-A6EX	344	0	2.76654	2.514478	4.191425	2.976743	4.503232	5.139079	3.296832	5.54013	3.09249	2.63989	3.47966	2.538517	7.54817	5.958016	2.808153	5.669119	7.230141	3.79792	5.398431	2.571145	4.302873	2.663246	6.09318	6.432565	3.438911	2.662758	4.174625	4.016306	5.160517
TCGA-VQ-A927	200	1	3.286225	2.554788	2.800182	2.560498	6.1536	5.470153	4.582582	4.387493	3.537342	2.638857	2.749833	2.537314	7.530235	2.421311	2.853557	5.56623	5.634463	3.935119	4.717141	2.592116	4.796871	2.992593	5.780456	6.661079	2.805536	2.910991	2.459574	5.055819	5.445539
TCGA-BR-4257	294	1	2.623512	2.495157	2.688379	2.560498	5.309401	6.043809	4.834743	4.097597	4.126184	2.663366	2.6464	2.549417	8.182529	3.436046	2.760667	6.878449	5.742103	4.558435	4.952161	2.579682	4.375616	2.570539	3.703162	7.359298	2.566691	3.498949	2.731563	4.294839	5.459859
TCGA-CG-4475	699	0	3.582219	2.561285	2.894318	2.560498	5.465008	5.590674	4.83513	5.199428	4.138274	3.170494	3.164544	2.702937	8.500597	4.786213	2.892769	7.544873	7.516888	4.554474	5.167777	2.571145	4.567547	3.656805	4.460714	7.31288	2.951111	3.369084	5.550082	5.195527	5.527791
TCGA-CD-5801	401	1	2.649552	2.492158	2.840961	2.560498	4.65298	3.463965	4.237545	3.874344	3.356255	2.640912	2.670699	2.553587	6.460283	2.258488	3.282793	4.452212	6.689672	3.519542	3.910031	2.581823	4.976342	2.865687	4.594986	6.277388	2.645951	2.944495	2.346473	5.471177	4.87847
TCGA-VQ-A8PP	712	1	2.662669	2.566808	2.720349	2.560498	5.901778	4.691216	4.750112	5.302131	3.535389	2.6349	3.073857	2.580707	7.893307	5.061606	2.870006	7.082651	6.325599	4.387825	5.427494	2.589714	5.637707	3.756702	6.125049	6.908474	2.571749	3.245384	3.41276	5.555941	6.142545
TCGA-RD-A7C1	507	1	3.382445	3.138481	3.243054	3.572994	4.979599	4.242858	3.837903	4.08661	3.469485	3.266203	3.584032	3.341708	6.399185	2.806696	3.732093	5.126337	4.936426	4.98352	4.553969	3.252223	4.044741	3.086737	3.260207	5.941363	2.674708	4.033258	3.212903	5.473663	5.444606
TCGA-HU-8604	694	0	2.618703	2.548732	2.858365	2.560498	5.170686	4.341427	4.158568	6.38393	3.167436	2.6349	2.645381	2.617788	7.358	2.391873	3.889933	6.492365	5.649907	4.745596	5.267776	2.571145	4.020062	2.640263	2.871774	6.211389	2.6418	3.768367	2.50839	5.55061	5.466441
TCGA-BR-6456	308	0	3.109662	2.581404	3.665647	2.560498	5.421589	5.697428	5.062894	5.237887	4.787691	2.644989	3.091222	2.702576	8.389372	4.89189	3.073826	7.170095	6.368443	4.417387	5.16062	2.571145	5.226741	4.135964	5.235535	7.556747	2.873244	2.864723	3.039409	5.688338	5.980873
TCGA-BR-7901	105	1	3.83149	2.55963	3.014645	2.560498	5.032147	5.688102	4.300025	5.596858	4.165866	2.658437	2.734894	2.696274	8.556586	5.327676	2.836411	6.906709	6.148134	4.168296	4.288213	2.592158	4.410026	3.822204	5.027479	7.030802	2.733614	3.303929	3.614428	5.240722	5.661335
TCGA-MX-A663	300	1	3.796256	3.174588	3.552718	2.692441	5.941331	5.57662	4.396184	6.21617	4.741182	3.15533	3.133646	2.76271	8.265004	4.130059	2.919139	6.320866	6.527608	4.182111	5.100515	2.579221	5.076129	4.767268	5.942651	7.219121	6.064975	2.941657	4.217462	4.439285	5.6491
TCGA-VQ-A8PF	76	1	2.689655	2.574259	3.088912	2.560498	5.973995	5.145249	4.960883	5.791717	3.906062	2.65573	2.758013	2.626864	8.006473	2.408145	3.461609	5.565741	5.775619	5.799059	5.082479	2.615295	5.694123	2.681432	5.233961	6.673371	2.684248	3.588738	2.413717	5.993235	6.118372
TCGA-BR-7715	469	0	3.038802	2.502261	2.784228	2.560498	4.648503	5.304023	3.963647	5.476334	3.870745	2.649885	3.394495	2.567365	7.83638	5.393741	2.785674	5.738091	6.35531	4.058742	4.136336	2.571145	5.251381	2.937584	6.234753	6.468585	2.624855	2.730299	3.152529	4.475195	5.473271
TCGA-D7-8575	554	1	2.95273	2.594535	3.408439	2.581084	6.16801	5.320226	5.334216	4.585912	4.206252	2.737558	2.843732	2.776552	7.793828	2.359889	3.964603	5.94896	6.344644	3.6162	4.570744	2.655073	4.739901	3.107239	5.325505	6.985807	2.815139	3.451561	2.582794	5.457128	6.565292
TCGA-CD-8531	383	0	2.663426	2.529917	2.717839	2.60063	5.716178	4.108035	6.293003	4.554421	3.070462	2.655991	2.664185	2.667334	6.982446	2.243223	3.326339	5.729911	5.156923	4.284062	3.985302	2.608506	3.253212	2.501752	3.120795	6.90843	2.725428	2.857931	2.910785	5.75142	6.304882
TCGA-IN-7806	645	0	3.398641	2.524441	3.483855	2.560498	5.4768	4.186101	3.711164	4.540491	4.025412	2.672296	2.847611	2.599832	7.223078	3.085559	2.756572	5.742917	6.697009	3.785371	5.083385	2.578661	5.190204	2.71571	4.404954	6.485149	3.823127	2.719656	3.762205	5.31451	5.714623
TCGA-BR-8485	280	0	2.927609	2.593081	2.834673	2.588542	5.615603	5.628747	4.788116	7.244362	4.515642	2.719886	3.195618	2.58339	8.579884	5.312715	3.409647	6.955518	6.499313	4.732304	5.284757	2.584261	4.893808	3.209528	5.426736	7.304051	2.655483	3.278783	2.580069	5.131572	6.26652
TCGA-IN-A7NU	356	0	2.629753	2.517752	2.747506	3.217657	4.602367	4.008926	3.655957	3.520716	3.678877	2.6349	2.876969	2.570154	6.901357	2.583594	2.777833	5.487793	6.125405	3.990603	3.761852	2.609294	4.44857	3.19784	4.164945	6.916617	2.604253	2.869736	2.974374	5.766906	5.174288
TCGA-HU-A4H5	724	0	2.613467	2.561461	2.692767	2.649629	4.956872	5.855545	5.237991	5.254904	3.878336	2.641784	2.719552	2.621702	7.754983	5.076205	2.84552	4.829849	5.89732	4.704666	5.4471	2.577273	5.346094	2.632631	3.43865	7.850566	2.609348	2.957623	2.471098	5.336941	5.750464
TCGA-RD-A7BW	156	1	5.125292	3.007447	3.272319	2.888637	5.269809	5.620341	4.155844	5.284447	3.83801	3.06762	3.058981	3.56075	8.108885	3.138852	3.153957	6.614584	6.660978	3.250686	4.699895	2.809696	4.557628	4.139325	6.095178	6.730412	4.849076	2.935191	4.202523	5.521418	5.091451
TCGA-D7-8579	636	0	2.792784	2.591537	3.402204	2.560498	5.909861	5.483955	4.55708	5.423488	3.543786	2.642788	2.8427	2.679685	8.294521	2.900272	3.140858	5.993736	6.503563	3.931084	4.873912	2.571145	5.137077	3.289023	6.00796	6.570835	3.715823	3.800259	3.444121	4.905578	5.752405
TCGA-RD-A8N6	272	1	3.781327	3.390436	3.39501	3.277114	5.560766	5.298429	5.070651	6.156125	3.552501	3.393147	4.183477	2.633082	8.029233	4.770839	3.027545	6.002469	6.687752	4.436714	5.127073	2.631259	4.717386	3.852373	6.025518	6.828942	4.058244	2.891502	3.45335	5.001235	5.744744
TCGA-D7-A4YX	461	0	2.605815	2.50274	3.049061	2.560498	5.849219	4.975844	4.659972	4.326985	3.222413	2.638997	2.685479	2.532705	7.09749	2.338623	3.38238	5.15474	6.379108	5.307986	4.443808	2.578424	5.455349	2.729794	3.063121	6.886685	2.593367	3.009993	2.390717	6.019238	6.418404
TCGA-BR-A4CS	45	1	2.62395	2.483863	2.69982	2.560498	4.273698	5.202764	2.70807	4.335085	3.618253	2.6349	2.624856	2.539078	6.796075	2.262203	2.797145	5.423149	6.104392	3.116759	4.908199	2.576013	3.488493	2.642543	2.988459	5.840846	2.724369	3.24168	5.641837	4.847869	5.14664
TCGA-BR-4191	558	1	2.908272	2.968495	3.093389	2.737407	5.108082	5.336641	4.71756	4.625923	4.209143	3.096734	2.893907	2.894509	7.886665	2.477318	3.47656	6.583486	6.080561	4.142384	4.421381	2.935145	5.130891	2.90143	5.235917	7.004679	2.590423	3.93759	2.893645	5.117944	5.318205
TCGA-B7-A5TI	595	0	2.621364	2.549759	3.232552	2.576569	5.144899	5.371843	4.053193	5.352037	4.296006	2.715842	2.670787	2.849069	7.875371	2.782741	2.915003	6.40767	5.895769	5.2592	4.653571	2.571145	5.108397	2.921316	4.030466	6.538146	2.547656	2.737381	3.267209	4.125024	5.825935
TCGA-CG-5722	30	0	2.927552	2.678903	3.598955	2.560498	5.252892	4.298565	4.492661	5.294006	3.074165	2.6349	2.766867	2.577088	6.660142	2.513319	3.109805	5.060609	5.374172	4.093055	5.812033	2.605214	4.886874	2.695965	4.161147	5.763283	2.765566	3.183006	2.463752	4.711078	5.435093
TCGA-CG-5726	881	1	2.640299	2.483575	2.815069	2.560498	5.388942	4.201621	4.010507	4.046799	2.695882	2.6349	2.62079	2.538814	6.702628	2.230942	2.726072	4.108361	5.177224	5.052149	4.819569	2.571145	5.045952	2.526649	4.806172	6.612104	2.657247	2.75137	2.864604	4.401718	5.985752
TCGA-D7-A748	132	1	2.635824	2.623306	2.805378	2.560498	4.324905	4.825091	3.935236	4.53085	3.745206	2.6349	2.632318	2.571916	7.385993	2.550036	3.477863	6.382576	5.67563	3.206494	3.963318	2.583265	3.707222	4.374988	4.071877	6.694961	3.077916	3.278234	2.502545	4.730993	4.629159
TCGA-BR-8373	450	0	2.880313	2.614812	3.179484	2.580447	6.115429	6.048112	5.319005	6.730424	4.858631	2.650539	3.483703	2.580672	9.0241	4.645387	2.977267	6.96055	6.601817	4.348833	4.438014	2.571145	5.747013	3.28841	5.363447	7.7635	2.829728	3.525767	2.731656	5.544576	6.51715
TCGA-HU-A4GH	358	0	2.720335	2.669674	2.672207	3.058074	4.915825	4.728244	4.170417	3.85196	3.179343	2.654238	2.630293	2.651496	7.578639	3.113843	2.783939	6.257077	5.608083	4.152756	4.157467	2.588397	4.307976	2.600747	5.150246	6.717763	2.660202	2.809211	4.972122	4.212033	5.739638
TCGA-CG-4437	245	0	2.664443	2.497457	2.816902	2.560498	4.728105	4.606127	4.28313	4.031414	3.255146	2.6349	2.650529	2.570037	7.268658	4.440724	3.177585	5.517797	4.877379	3.594202	4.299638	2.571145	5.039776	2.730549	3.436052	5.787542	2.558127	3.772669	2.418506	5.338766	5.563545
TCGA-CG-4469	215	1	2.609268	2.506226	2.814119	2.560498	5.05447	5.569869	5.089302	3.870693	3.446031	2.667007	2.695079	2.548897	7.249554	4.22246	3.13193	5.229013	6.357796	4.692569	5.515055	2.587631	4.261649	2.556947	3.117598	6.327862	2.604208	3.386249	2.432477	5.460056	5.718024
TCGA-VQ-A8PE	675	1	2.63927	2.533825	2.827211	2.997142	5.697824	5.085039	4.926567	5.901079	4.093496	2.639063	2.761945	2.542383	8.277553	2.497907	3.034969	6.845088	6.356806	4.63424	4.724221	2.571145	4.780968	2.651428	4.030363	7.540864	2.57123	2.993906	3.174987	6.002844	6.380017
TCGA-CD-8534	367	0	2.814137	2.688172	3.239533	2.560498	5.638877	5.104789	4.275416	4.689896	3.160444	2.670934	2.744892	2.721621	7.052594	3.301556	3.560895	5.038092	5.780441	4.676516	5.052516	2.584142	4.809206	2.740769	4.224193	6.331416	2.880433	2.87267	2.819109	5.3778	5.291303
TCGA-BR-8364	675	0	3.713043	2.97224	3.619819	2.560498	5.728035	6.203448	4.704874	5.888524	4.423019	2.700711	2.840632	2.709822	8.623299	4.31447	3.674801	6.761052	6.709981	3.826292	5.021707	2.571145	4.920764	3.711225	6.667041	6.858272	3.61019	3.287909	3.16284	5.237091	6.082272
TCGA-KB-A93J	1124	0	2.609168	2.533121	3.052008	2.560498	5.58852	5.101322	5.155335	4.603456	3.514695	2.648396	2.728113	2.558795	7.666374	2.349106	3.444725	6.963025	5.691234	4.919556	5.449352	2.571145	5.126886	2.581914	4.638073	7.562781	2.601603	2.919471	3.475413	4.835746	5.961197
TCGA-IN-8462	572	0	2.869871	2.562479	2.871612	2.576142	4.520596	4.353015	3.260458	3.8749	3.65149	2.892155	2.775522	2.597918	6.880144	2.711158	2.831092	5.89055	5.640478	3.348228	4.259902	2.628341	4.312407	3.161165	4.983246	7.152273	2.908159	2.795309	2.829491	4.826227	5.204664
TCGA-F1-6874	440	0	2.679178	2.621797	3.183061	2.742402	6.565264	5.712929	5.142666	5.843699	3.901219	2.726503	2.797558	2.798323	8.164353	2.532851	3.515017	6.124832	5.982247	4.877957	5.313768	2.864363	5.419428	2.785804	3.127963	6.912936	3.18016	4.363887	2.551889	5.161634	6.700405
TCGA-CD-A487	284	0	3.671853	2.540331	3.248717	2.579969	4.634889	4.708837	3.143877	4.289955	3.535549	2.665183	3.525996	2.678383	7.123024	2.622543	2.810165	7.23059	5.92292	4.182047	3.599512	2.598213	4.296264	3.299419	5.025307	6.590775	3.292663	3.30062	3.902254	5.446849	5.365814
TCGA-CG-4301	92	0	3.176638	2.733795	2.722819	2.576581	5.093769	5.306055	4.677128	4.483698	4.505981	2.672225	2.72077	2.66739	7.996442	2.668238	2.897586	6.543979	6.479925	4.22802	4.868768	2.578647	4.525214	3.309768	4.512376	7.251851	2.695489	2.910238	2.866888	5.562959	5.542435
TCGA-BR-8060	348	1	2.914101	2.818843	4.390165	2.638854	5.261055	4.937951	4.303655	5.155404	4.131598	2.701256	2.739829	2.693414	7.929805	5.315527	2.978704	7.614171	6.190366	5.163721	4.859406	3.868714	4.073104	3.075834	5.348344	6.992774	2.644295	3.700798	5.242731	5.54979	6.366427
TCGA-HU-A4HD	1016	0	2.669227	2.551216	2.789873	2.726315	5.235469	5.257568	4.340909	4.770957	3.199343	4.286143	2.727972	2.923299	7.783255	5.329021	2.786564	6.289929	6.149963	4.539479	5.28561	2.57527	4.523087	2.717006	4.599075	7.145765	2.665439	2.768037	2.649521	4.526616	5.275732
TCGA-BR-8369	427	0	2.847591	2.84523	3.433946	2.594024	5.411036	6.565691	4.936224	5.111212	3.926606	2.747734	3.057717	3.10024	7.997707	3.258537	3.305623	6.239587	6.604767	4.350849	5.659392	2.767916	4.982051	3.401286	5.534168	6.960183	4.022831	3.134313	3.242514	4.956988	5.850885
TCGA-BR-4267	188	1	2.643228	2.529538	3.040154	2.560498	4.823048	5.853272	5.391458	4.347611	3.560921	2.713191	2.662808	2.60771	7.827723	2.426184	3.033439	5.946978	6.44649	5.410615	4.313369	2.654345	4.401676	2.752179	5.084426	5.626956	2.572123	3.297346	3.260802	5.22575	5.564569
TCGA-BR-8284	245	1	3.152431	2.646373	2.976632	2.672274	5.718393	4.918616	5.072473	5.145385	4.135082	2.813464	2.655194	2.850873	7.719464	2.976314	4.017363	6.204136	6.132079	5.217592	5.522827	2.717662	5.23861	3.259695	4.520479	6.640776	3.265392	3.447582	2.802843	5.832105	5.904345
TCGA-VQ-A8PD	496	1	3.147944	2.67213	2.871239	2.560498	6.253791	5.59369	4.958142	5.741614	4.522692	2.647142	2.840784	2.537479	8.245894	3.217079	3.015389	6.087	6.17817	4.558836	4.930611	2.585667	5.257492	2.605409	5.342748	6.925634	2.923475	3.616888	2.511982	5.775517	6.16038
TCGA-VQ-A922	275	1	2.755841	2.855218	3.836151	2.712801	6.638371	6.527199	4.950676	6.476692	5.021202	5.25473	4.771852	2.62754	8.6404	5.572249	2.999801	6.714965	6.267318	4.590603	5.399463	2.58188	5.580545	3.208979	5.093444	7.234886	2.646633	2.904762	3.157854	4.936813	6.440463
TCGA-VQ-A8PB	1043	1	2.610514	2.516634	3.525439	2.560498	5.548686	5.515128	4.255495	4.675929	3.309078	2.6349	2.635292	2.540083	7.594717	4.953796	2.936922	6.283479	6.388798	5.193542	5.254989	2.576782	4.412222	2.746761	2.771561	6.651534	3.774321	2.953571	2.438193	4.024947	5.774207
TCGA-FP-8210	153	1	3.041072	3.459376	3.327298	2.560498	5.73752	5.620708	4.744338	5.740826	4.155952	2.802568	3.082444	3.311622	8.104302	3.628952	3.248878	6.275247	6.438545	3.791902	4.785698	2.588678	4.900155	3.69305	5.094129	6.525984	3.486889	3.475182	3.372184	5.336053	5.82066
TCGA-RD-A8N0	1236	0	2.982698	2.78127	3.095749	2.560498	5.40031	5.086073	4.53326	4.796291	3.527573	2.698523	2.750959	2.658713	6.841789	2.977675	3.217614	5.687162	5.628777	4.09142	4.701034	2.637138	4.055009	3.15499	4.783408	5.967062	2.84143	3.01728	2.854561	5.012436	5.497621
TCGA-BR-8289	81	1	2.891056	2.498005	3.414126	2.646916	4.892527	5.816256	4.887631	5.440531	2.99821	2.661288	2.763333	2.636924	8.304896	3.224706	2.906181	6.086276	6.025573	4.753645	4.6437	2.594715	4.679082	3.24299	4.210746	6.997107	3.046002	2.753311	3.345278	4.90865	5.813123
TCGA-HU-A4GJ	650	0	2.906859	2.704182	2.901914	2.560498	5.519305	4.860788	4.432802	4.643771	2.975495	2.666996	2.730783	2.577462	6.55494	2.908436	2.980973	5.337675	5.360467	4.580721	4.276878	2.582704	3.763327	2.811306	4.374859	5.623738	2.839173	2.979713	3.198443	5.373985	6.164787
TCGA-HU-A4H3	882	0	2.612911	2.501107	4.284049	2.631853	4.66686	5.651318	3.651697	5.479265	3.081723	2.641283	2.863186	2.562164	6.155531	2.38134	3.149974	5.725141	5.962256	4.446927	4.967341	2.588112	4.163218	2.718596	2.853473	6.609333	2.653749	3.121966	2.508123	4.431202	5.721478
TCGA-BR-8687	250	1	2.833339	2.529809	3.566649	2.560498	5.297789	5.391678	5.002001	4.651711	4.05592	2.6349	2.870199	2.730893	7.612975	5.641414	2.798943	5.95893	5.957348	4.236384	4.551713	2.578008	4.60182	3.272902	5.126089	6.499094	2.599524	2.762624	3.276653	4.231265	5.730254
TCGA-BR-4253	124	1	2.652975	2.556805	2.801762	2.57952	5.719221	4.210603	5.291879	4.462866	3.411642	2.6349	2.687785	2.532705	7.38335	2.276275	2.926536	6.085679	5.779929	5.847168	5.266552	2.571145	5.24053	2.635945	2.795665	6.438692	2.583082	3.754542	2.413144	6.379922	6.016483
TCGA-BR-8381	224	0	2.730808	2.73615	3.270117	2.63194	5.264206	4.376484	4.231712	4.610313	3.651945	2.749408	2.732852	2.724787	7.447048	2.24569	3.681033	5.9512	5.617881	4.26171	5.848471	2.882048	4.61287	3.017123	3.053418	6.236652	2.702492	3.295896	3.091672	6.02054	5.736414
TCGA-FP-7998	678	0	2.856075	2.576701	3.264307	2.560498	6.185622	4.95979	5.358613	5.465606	3.269165	2.648492	2.82588	2.663188	8.12919	2.395287	4.858326	5.863516	6.014206	4.807344	5.11578	2.58727	5.683851	2.917009	4.618883	6.714233	3.287284	4.199668	2.72325	6.459592	6.351439
TCGA-HU-A4GD	692	0	2.94969	2.864944	3.906097	3.151679	4.636264	4.662275	3.558192	4.204989	3.59798	3.953137	3.613282	3.891066	6.252287	3.259549	4.428898	5.80446	5.565034	3.557993	5.295265	3.199912	3.480972	3.092138	4.100036	5.776817	2.67989	3.682832	3.076595	4.878175	5.222306
TCGA-VQ-A8DV	403	1	2.635791	2.49762	3.210294	2.660888	3.978707	4.504335	3.296112	5.320806	5.472248	2.685497	2.708782	2.615688	7.611294	4.299355	2.821708	6.282735	5.896125	3.721511	4.212593	2.66031	3.570079	2.511406	5.123567	6.824269	2.59715	2.687202	4.24333	3.347003	5.023374
TCGA-VQ-A8PH	389	1	2.711725	2.573401	2.712874	2.70336	4.580315	4.176058	3.58244	6.240964	2.964787	2.6349	2.828603	2.560088	7.459739	5.433979	2.782476	5.810186	6.13835	4.182116	4.740642	2.599032	4.067894	2.53215	4.937728	6.306257	2.568282	2.722383	2.926724	5.366492	5.278866
TCGA-R5-A7ZR	185	1	2.701797	2.507378	2.773565	2.795763	5.196506	4.230595	4.000398	3.972922	2.935789	2.6349	2.659688	2.538343	6.986776	3.222516	2.749419	6.629921	5.756197	4.777548	4.354607	2.571145	4.053475	2.478983	4.248325	6.893568	2.567093	2.645118	2.751237	4.786057	5.431161
TCGA-BR-6564	794	1	4.242503	2.650049	3.435625	2.560498	5.524324	5.560696	3.883785	5.493009	3.751339	2.765295	2.85278	2.550678	8.277664	3.729267	2.85122	5.876859	6.290777	2.587399	4.043863	2.571145	5.675057	3.467269	5.923999	6.610934	4.85633	2.945345	2.984782	4.898271	5.421219
TCGA-IN-A6RN	594	0	2.856622	2.537893	3.14608	2.799035	4.688788	5.501406	3.963588	3.740116	3.513021	2.673506	2.70595	2.544126	6.559545	3.420206	2.749774	5.418594	5.312383	3.668742	3.616056	2.588545	3.904079	2.816714	4.858374	5.873785	2.673985	2.638413	2.972089	4.459622	5.380643
TCGA-VQ-A928	174	1	2.98584	2.66084	2.892556	2.560498	5.906639	6.455928	4.609019	5.758316	3.543097	2.670618	2.923255	2.653351	8.887557	5.695445	2.932346	6.485044	6.077493	4.231451	5.538872	2.58545	5.465286	3.197525	5.743389	6.875581	2.828129	3.270693	2.981194	5.021515	5.950123
TCGA-BR-7958	388	0	2.669547	2.501744	2.941104	2.560498	5.472464	4.476513	4.984629	4.857132	3.437285	2.6349	2.68012	2.532705	7.735942	2.378552	3.876302	5.905024	6.097984	5.00377	5.005761	2.571145	5.783231	2.811335	3.729325	6.246803	2.648741	3.303404	2.773767	6.491404	6.05213
TCGA-CG-4305	485	0	2.617656	2.523635	3.001608	2.560498	5.485398	4.931386	4.767533	4.09567	3.744765	2.711967	2.775198	2.985339	7.741684	4.607925	3.181289	6.265245	6.217967	4.531712	5.469839	2.599394	4.412684	3.110155	3.427985	6.621172	2.659763	3.583643	2.457718	4.793568	5.4519
GSM1523727	2662	0	2.833158	2.369595	3.920914	2.546676	5.750175	4.261988	4.039887	4.066163	2.971928	2.765122	3.271447	2.968352	6.660579	4.660382	3.483381	4.065343	5.478184	4.809386	4.812531	2.509801	5.576425	2.771598	4.53165	6.551417	2.77782	3.756449	2.420726	5.582741	5.299186
GSM1523728	2647	0	2.643901	2.347141	3.580354	2.506809	5.551142	4.264677	4.491086	4.840589	3.244852	2.742917	2.925388	2.6541	7.383339	3.586464	2.966712	6.15089	6.004716	4.067628	4.984368	2.454843	4.641687	2.909897	2.827429	6.513209	2.763019	3.873195	2.534364	6.493834	6.089696
GSM1523729	2647	0	3.014237	2.51942	3.105795	2.592223	6.046214	4.373347	4.71044	4.627578	3.306536	2.741727	2.975859	2.791069	7.112537	5.349734	3.072824	5.277092	5.921287	4.311696	5.341553	2.57688	4.439809	2.726019	5.125193	5.921924	2.546093	2.914744	2.673898	5.217351	5.714805
GSM1523744	3171	0	2.699707	2.425668	3.773314	2.581321	5.148342	3.918966	4.356863	3.926965	3.170496	2.775624	3.860432	2.741955	7.120154	4.285071	3.309221	5.783689	6.194537	5.116673	4.762502	2.670932	5.526884	3.041882	2.574096	5.954784	2.773851	3.422121	2.340894	5.230497	6.385807
GSM1523745	3166	0	2.627057	2.718565	3.009295	2.677794	4.946768	4.3993	4.330388	4.5942	3.528336	2.664215	2.921929	2.660625	7.87782	3.500359	3.17361	6.5787	6.456815	4.429653	5.633044	2.591256	4.348443	2.72485	4.599844	6.60263	2.681319	3.083651	3.476116	4.221802	6.006802
GSM1523746	765	1	2.808597	2.776937	2.908879	2.478076	5.121298	4.938923	4.311094	7.086904	2.880672	2.741292	2.920174	2.701287	8.341303	2.30933	2.870713	5.817035	6.441113	4.16971	4.338878	2.75801	4.294491	2.858664	4.760005	7.113821	2.470122	3.077586	4.433772	4.463009	6.05029
GSM1523747	261	1	2.692538	2.541505	3.269956	2.640854	4.277253	5.076837	3.815526	4.187317	3.237	4.286862	2.97671	2.557592	8.370156	2.728069	3.480516	7.015877	6.799817	4.394883	6.16166	2.588529	4.363045	3.026504	4.922444	6.081607	2.771438	3.392942	3.102203	4.391812	6.418448
GSM1523748	3148	0	3.699855	2.567894	3.087692	2.393199	5.294529	4.56968	4.117751	4.35861	3.388107	2.699354	2.258089	2.79721	6.760521	2.139282	3.019519	5.556404	6.083338	4.031358	5.330045	2.638941	4.478033	2.803623	4.999046	6.405638	2.502498	3.095926	2.792887	4.548152	5.448834
GSM1523765	426	1	2.709741	2.645593	3.452699	2.602476	4.905389	5.85761	4.205954	4.935817	4.197571	2.860014	3.294099	2.792035	6.903769	3.830075	3.127317	5.200393	5.512072	4.41342	5.009609	2.795856	4.541774	3.352485	4.047298	6.773086	2.743776	2.714978	2.714733	4.714865	6.365025
GSM1523768	727	1	3.036517	2.517073	2.794986	2.594895	4.897073	4.67957	4.277164	4.989722	3.664345	2.764332	2.910354	2.827863	8.070393	3.706314	2.874977	6.955154	5.994202	4.059625	4.229056	2.685613	4.746958	3.235034	3.652209	7.079264	2.806901	3.14306	2.862084	4.890707	5.526218
GSM1523769	412	1	3.459649	2.697347	2.439223	2.535852	5.79738	4.922111	4.208968	5.133111	4.001619	2.70561	2.93	2.676044	7.517739	2.683947	2.670947	6.601116	5.47776	3.938971	5.325041	2.649965	4.443971	2.756495	4.857956	6.576888	2.596743	2.770253	2.718379	5.412585	5.405986
GSM1523770	662	1	2.728665	2.652631	3.352983	2.705425	6.239731	4.031135	4.272657	3.69191	2.914409	2.703636	2.655925	2.827863	6.323801	3.721792	3.477015	7.165528	6.166754	5.166154	4.378532	2.677638	3.770614	4.589922	3.380305	5.555507	2.789271	2.874015	2.634645	6.287495	6.145146
GSM1523771	380	1	4.099297	2.777341	2.372891	2.396267	4.815189	5.222421	3.645683	6.048903	3.836516	2.667898	2.174415	3.11702	7.92217	2.798948	2.967671	6.963171	6.868004	2.845115	5.17948	2.828658	4.378737	4.501113	5.805102	6.225017	4.687422	2.710466	4.41789	4.981378	4.969354
GSM1523772	301	1	3.5618	2.466609	2.613605	2.755389	4.71769	5.544646	3.659033	5.232482	3.803488	2.745562	2.621986	2.511115	8.137147	1.670192	3.299292	6.238348	6.647251	2.811509	5.148717	2.817941	4.934588	4.194123	4.319277	6.48512	2.926274	2.255571	2.64534	5.110055	4.997701
GSM1523773	130	1	3.691804	2.999376	2.171808	2.546957	5.18284	6.119808	4.467547	5.616893	3.824115	2.805328	1.74228	2.554057	8.215577	1.8084	2.880376	6.214235	6.982931	3.359121	4.864385	2.655035	4.480449	4.138859	6.315482	6.784802	3.759362	2.602288	4.410989	4.692597	5.131913
GSM1523774	2931	0	3.186013	2.610037	2.260991	2.64216	5.409537	5.494289	4.078058	4.373267	3.238911	2.626034	2.169163	2.511115	7.744362	1.590201	2.599609	5.997606	6.783412	4.510301	4.909973	2.791122	4.353934	3.357442	6.407285	6.22115	3.105767	3.136666	3.784923	4.222895	5.675989
GSM1523775	2928	0	2.969536	2.522396	2.882419	2.72909	5.293229	4.264157	4.281624	3.868627	3.175571	2.732438	2.911364	2.524565	6.470941	4.087465	3.179997	5.896981	6.24308	4.526489	4.783195	2.44281	4.043988	2.590484	4.213581	6.094128	2.770212	3.089321	2.967781	4.343719	5.882478
GSM1523776	2924	0	2.5551879	2.5253653	3.0251895	2.407416	6.1477403	4.3934827	5.0057201	4.2144123	3.4694902	2.6624124	3.375427	2.5571585	5.673886	4.4422936	3.3804507	4.9543431	5.6281457	4.5323323	6.1187071	2.5261777	5.8449071	3.0957157	2.2726367	5.6206079	2.6886333	3.230208	2.4752944	6.3486509	6.3325877
GSM1523777	2788	0	2.513873	2.600479	3.620343	2.581608	5.414699	4.167051	4.163447	4.529259	3.460739	2.678785	3.128072	2.789218	7.06325	4.75304	3.037607	7.320282	6.464119	4.721834	5.464734	2.606593	4.844993	2.460942	3.709998	6.535958	2.671374	2.756912	2.458183	5.416364	6.110596
GSM1523778	2779	0	3.070751	2.702038	2.888205	2.583843	5.418035	5.106841	4.686962	4.939308	3.401878	2.692684	2.120068	2.537966	7.834661	3.410569	2.443574	6.184044	5.958609	4.342953	4.504888	2.634681	4.26018	2.640399	3.953151	6.798739	2.783556	2.988224	2.639158	4.83312	4.902686
GSM1523779	2778	0	2.928112	2.443193	3.050919	2.37153	6.286293	4.033124	4.749976	3.77221	3.217199	2.742338	2.931898	2.648435	6.47957	3.985437	3.258358	4.946392	5.530403	4.89552	4.824756	2.519657	4.765997	2.413586	4.447675	6.269616	2.56825	3.226232	2.933275	5.515001	6.079091
GSM1523780	492	1	2.685056	2.657226	3.338262	2.60134	5.511249	4.423531	4.960785	4.621572	3.266816	2.70077	2.673174	2.925205	7.556602	4.336546	3.388878	6.392835	6.066246	4.725583	4.110752	2.748557	4.960141	3.466481	3.090863	6.410856	3.357089	3.115068	2.598013	5.682579	5.534388
GSM1523781	88	1	2.89669	2.567894	2.806967	2.730399	6.735149	4.592553	4.856438	4.284563	3.166375	2.652968	2.792329	2.707924	8.572051	3.671314	3.493866	6.929734	6.323971	4.294763	4.118817	2.661011	5.028914	2.672255	5.192723	8.263341	2.74339	3.256679	3.005649	3.904941	5.996208
GSM1523782	132	1	2.606453	2.539208	3.693249	2.668738	5.32518	6.089693	5.089263	5.991453	3.674353	2.823987	3.820716	2.570296	7.518903	4.337804	3.053777	6.190455	7.083853	4.378522	4.957288	2.786867	5.271526	3.429456	2.829151	7.063966	2.846573	3.379201	2.384561	5.901592	5.829317
GSM1523783	2758	0	2.902291	2.587689	3.450216	2.677034	5.742838	4.451187	4.565744	4.673011	3.312452	2.664215	3.126347	2.580802	6.739532	4.308631	3.164668	6.299055	5.710958	3.046609	4.730376	2.547612	4.907104	3.11632	4.386166	7.023554	2.452633	3.205977	2.66002	5.127148	5.428231
GSM1523784	2739	0	2.808597	2.651191	3.044648	2.660471	5.32518	5.248108	4.525393	4.43268	3.986552	2.593721	2.665758	2.714662	7.565738	3.325367	2.758988	5.393712	5.949101	4.465973	4.517369	2.500121	4.126326	2.70315	5.555238	6.784802	2.456589	3.649001	2.868791	4.386904	5.645113
GSM1523785	353	1	2.572493	2.502223	2.985498	2.619175	5.51247	4.216412	4.313718	3.897535	3.290536	2.625003	2.794126	2.807343	6.735608	3.389385	3.286797	6.082049	5.887012	3.659908	4.742567	2.654326	4.926157	3.239533	4.151985	6.947807	4.073331	3.082965	2.852175	5.956968	4.995875
GSM1523786	854	1	3.750819	2.538518	2.917652	2.623819	5.093641	4.329848	3.985658	4.495925	3.911511	2.597006	2.837448	2.839382	6.995174	3.11443	2.831863	5.656951	5.603353	3.957737	4.922162	2.583042	4.564222	2.876827	5.067004	6.588899	2.572253	3.176209	2.508559	5.368541	5.503813
GSM1523787	2689	0	2.655021	2.339205	3.561056	2.696258	5.397741	4.514778	5.566896	4.457126	3.551189	2.741085	2.975859	2.714662	7.880662	3.371152	3.230284	4.928267	6.696545	4.388399	4.521115	2.521351	5.146473	2.683611	3.613826	6.709018	2.626946	3.393983	2.956502	5.307978	6.422973
GSM1523788	248	1	3.378153	2.662854	2.226357	2.657145	4.86512	5.138402	3.632336	5.86875	4.754524	2.685725	2.587619	3.690019	8.476911	2.918424	2.632279	7.211583	6.200643	3.929885	4.388488	2.589292	3.888789	2.954734	5.292569	6.621124	2.998166	2.436636	3.153704	4.628255	5.371886
GSM1523789	354	1	2.569312	2.528419	2.733987	2.521377	5.253932	4.999315	4.015012	4.911496	4.40922	2.639698	2.473143	2.849169	7.89461	2.456238	3.068001	6.344394	5.926827	3.924494	4.352834	2.521192	5.548832	2.699711	4.814652	6.24896	2.59896	2.984804	2.876306	4.875839	5.133228
GSM1523790	2428	0	2.61528	2.809765	2.8196	2.581608	5.284139	4.38475	4.372851	5.214911	4.066298	2.655984	2.887479	2.770021	7.743032	3.414413	3.385782	7.14115	6.226158	4.179475	5.761466	2.700261	5.149527	2.864093	2.535338	6.324076	2.811336	3.601712	3.640082	6.843299	5.900374
GSM1523791	2434	0	2.49006	2.402671	3.317538	2.655111	5.626194	4.442362	4.862914	4.071598	3.513701	2.642974	2.748125	2.862664	6.943964	4.023232	2.840677	6.815335	5.674981	4.426607	5.599513	2.600834	5.334612	2.824474	2.395646	5.391724	2.764432	3.543449	2.556191	6.309785	5.749501
GSM1523792	2424	0	2.948153	2.472299	2.947533	2.603041	4.809576	4.199958	4.059048	4.142893	2.716101	2.777666	2.674137	2.50859	6.282807	3.531285	2.975247	6.825834	6.229287	4.4711	5.069587	2.576452	4.647185	2.834074	4.158992	6.369732	2.79767	3.377466	2.631037	5.512047	5.763141
GSM1523793	2422	0	3.226113	2.596485	2.432988	2.553183	5.149642	5.376848	3.284221	3.648591	6.433609	2.623016	2.729917	2.363308	7.227423	2.848493	3.008671	5.884281	5.75435	4.446443	4.464551	2.466503	3.871605	2.690079	5.26479	6.938376	2.534925	3.096992	5.386083	5.479881	5.478491
GSM1523794	810	1	2.558368	2.498095	3.152514	2.606587	4.837911	4.490453	3.997113	4.983473	4.375567	2.68819	2.735991	2.40396	8.539498	3.642673	2.798535	7.55622	6.168523	4.61558	4.273753	2.5905	3.761031	4.799848	3.89558	8.259262	2.643437	3.78695	5.169837	5.826198	5.705316
GSM1523795	2402	0	2.455185	2.390583	2.911202	2.454968	5.042829	5.987637	4.391841	4.893841	3.448378	2.624006	2.798427	2.763202	7.636077	1.880204	3.45624	6.145622	6.609566	3.896248	4.887201	2.665167	5.269738	2.682007	3.625312	7.576583	2.502498	3.298098	3.067111	5.967791	6.288106
GSM1523796	1729	1	2.507968	2.581608	2.347513	2.75867	4.819095	5.375229	4.170397	6.520728	4.422764	2.589046	2.272179	2.563775	9.008502	2.683947	2.639571	7.560922	6.072655	3.851919	3.658713	2.505346	4.219368	3.397592	3.926533	6.948811	3.057088	3.339649	2.877098	4.978948	4.756884
GSM1523797	848	1	2.85938	2.476833	3.02602	2.57916	5.227078	4.416035	4.59898	4.547128	2.726519	2.741499	2.66391	2.618765	7.420055	3.847274	2.943383	6.439187	5.580822	4.032669	4.239418	2.50589	4.752781	3.07971	4.766473	7.34038	2.580963	3.52746	3.424889	4.84596	5.395346
GSM1523798	1855	1	3.048623	2.835651	2.450045	2.640567	5.782974	4.363137	4.796526	4.820283	3.362015	2.706178	2.608609	2.541037	7.269984	3.762327	2.562581	5.919993	5.774217	4.698454	4.622423	2.501345	4.323922	3.26902	4.112952	6.239268	2.478009	2.806442	2.486043	6.079286	5.872675
GSM1523799	2325	0	2.832297	2.454563	3.073549	2.627226	5.522254	4.131269	4.328503	4.107463	3.217199	2.639082	2.074078	2.693349	7.978444	5.711119	2.93194	6.884305	7.26686	4.343707	4.572473	2.482635	4.709316	2.919081	3.80598	7.145516	2.891891	3.289032	4.558885	4.806583	6.285183
GSM1523800	2308	0	2.525211	2.400275	3.910855	2.6664	5.438299	4.778264	4.307259	4.331148	2.889497	2.829118	3.214738	2.721807	7.761943	5.231534	3.132191	4.089549	6.761489	4.557024	4.705379	2.649241	6.311438	2.875302	2.128347	6.768098	3.01735	3.171324	3.380447	5.890776	5.653051
GSM1523801	2308	0	2.662593	2.917116	3.462473	2.596201	6.024702	4.019137	4.486	5.351957	3.140972	2.706977	3.042501	2.683108	6.516679	4.08868	3.273957	4.86129	5.182317	5.205581	4.92848	2.598564	5.0174	2.705376	4.061638	5.886319	2.528846	3.264893	3.717979	6.219456	5.585941
GSM1523802	2303	0	2.578784	2.35258	3.134018	2.699796	5.098922	4.794942	4.139179	3.911471	3.334846	2.725843	2.473142	2.43837	6.957605	3.985437	2.858221	5.467049	6.124525	3.78881	5.658184	2.57297	4.969224	2.898883	4.274872	6.671478	2.740521	3.713143	3.545704	5.25647	5.499296
GSM1523803	212	1	2.844158	2.618118	3.081629	2.570916	5.260512	4.384196	3.483083	4.751874	3.40602	2.664032	2.789703	2.600063	7.681236	3.995941	2.575603	5.193753	5.530842	4.534834	4.486247	2.513619	4.155153	2.685774	4.801685	5.92338	2.470604	2.82671	3.050094	5.063756	6.270446
GSM1523804	2301	0	2.923605	2.438713	2.961295	2.630327	5.636714	4.805728	4.289396	4.625813	3.533448	2.701803	3.129791	2.517426	7.508817	4.079717	2.735194	5.796806	5.63747	4.229726	4.766064	2.529513	3.726405	2.881619	5.655596	6.464393	2.463947	3.126841	2.757193	5.03362	5.36305
GSM1523805	134	1	3.280529	3.6793	2.541317	2.725138	5.140704	5.473374	4.286228	4.661855	4.151539	2.659287	2.779315	2.620891	7.770814	2.856164	2.867252	6.143645	5.766654	4.745114	4.851357	2.678514	4.252323	2.961909	4.668228	6.720552	2.774645	2.641345	2.922754	5.343408	5.533717
GSM1523806	381	1	3.111288	2.621073	2.897712	2.625321	4.889436	6.11591	3.955836	4.587762	3.246292	2.626844	2.774943	2.907413	7.024071	2.714058	2.787324	5.459255	6.242437	4.318288	4.660736	2.573707	4.01555	2.904908	4.054996	6.788868	2.65069	3.189374	3.619592	4.685736	5.847951
GSM1523807	2212	0	2.985776	2.486706	2.841373	2.538843	5.612534	4.535019	4.271329	5.666731	3.696529	2.637699	2.298903	2.428451	8.13213	3.003297	3.041023	5.931313	5.80378	4.349679	4.518458	2.574296	4.502783	2.638571	4.925695	6.66384	2.821909	3.262687	2.818881	5.348426	5.746836
GSM1523808	2205	0	3.442533	2.496225	2.460181	2.596932	5.734467	5.108003	4.53747	4.601826	3.667195	2.794271	2.120068	2.634016	7.420995	2.779387	2.505901	6.304023	6.134282	3.922383	4.762502	2.561906	4.63316	2.70354	4.336321	6.679163	2.766511	2.841446	2.772208	4.933103	5.550867
GSM1523809	2203	0	2.484718	2.470943	3.434279	2.566387	5.699956	4.323476	4.772014	4.164308	3.202745	2.662617	3.858611	2.692509	6.938697	2.89017	2.8764	4.804179	5.74284	4.930246	4.656703	2.38196	4.807881	2.884272	3.824131	5.833222	2.720217	3.347857	2.66769	5.309242	5.664065
GSM1523810	2192	0	2.66863	2.632347	2.789345	2.621514	5.215742	4.491002	4.701979	4.279195	3.298811	2.638276	2.971522	2.777375	7.2026	3.946253	3.138665	6.330484	6.767562	4.341849	5.308397	2.595471	5.187113	2.680462	4.118231	6.281345	2.738944	3.433567	2.372106	6.758225	5.7348
GSM1523811	2186	0	3.115228	2.451053	3.171928	2.546096	5.22234	4.283325	4.253408	4.406414	3.173244	2.717519	2.791504	2.683547	6.659839	3.319003	2.554852	5.892852	5.158164	4.752716	4.83531	2.655405	4.186863	2.915763	4.966291	6.643742	2.325942	3.494359	2.795684	6.040121	5.942887
GSM1523812	2185	0	2.661969	2.504645	3.095951	2.534752	5.697917	4.513745	4.208968	4.692307	3.745227	2.610684	2.868336	2.570296	7.775817	2.053264	2.903892	6.040983	5.906059	4.386034	4.629789	2.545806	4.41486	2.81112	3.459517	6.546755	2.508344	3.52746	2.456909	6.101197	6.151083
GSM1523813	2185	0	2.787791	2.511543	2.78384	2.756871	5.032818	4.477505	3.938507	4.608171	3.842462	2.658913	2.34638	2.494916	7.840113	2.775691	2.667546	6.405597	5.753324	4.982847	5.399864	2.663293	4.416747	2.916167	4.755933	6.571621	2.565135	3.287959	2.854593	4.267188	5.773376
GSM1523814	2182	0	2.568447	2.550046	3.26039	2.562555	4.832623	4.472032	5.010823	3.952258	3.220456	2.742725	2.787126	2.60825	8.4075	3.081382	2.80237	6.664915	6.120824	4.20784	3.791481	2.780533	4.984468	3.093827	4.441375	6.128539	2.530662	3.417051	3.947729	4.7839	6.536774
GSM1523815	755	1	2.7024387	2.6080375	3.387522	2.5186398	4.6333239	6.2949052	3.6966505	7.3380562	3.1837463	2.592297	2.9348924	2.5450176	6.8237317	2.973753	2.6131569	5.7155916	6.7418393	5.0344132	6.1086631	2.5747291	3.8673571	3.0953224	5.0750769	5.9172359	2.9250492	3.1516019	4.5406616	5.066171	6.6754355
GSM1523816	2162	0	2.710961	2.509606	3.576959	2.667568	4.601185	5.415272	4.094037	4.684052	3.48634	2.746902	3.076901	2.902563	6.910595	3.746511	3.470057	5.073734	6.236777	4.090806	4.809498	2.653243	5.128675	3.06943	2.905311	6.771123	2.789662	3.180793	2.490979	5.555741	5.833999
GSM1523817	187	1	2.6399191	2.6898347	3.5094727	2.5826435	5.037587	5.8225558	6.3240156	5.0555149	3.4954981	5.1552803	2.8356769	2.6331491	7.3497965	3.0929731	3.0489766	6.4339777	7.7756783	4.4919905	4.980797	2.3775282	4.5605192	3.035178	5.0151189	6.9594586	2.7823298	3.1758652	5.2833508	4.6918663	6.3754181
GSM1523818	295	1	2.938565	2.669559	3.26828	2.683372	5.718939	4.683332	5.173416	4.887719	3.61915	2.656367	2.84512	2.527271	7.091083	4.597888	3.381863	4.478149	5.373374	4.430057	5.093572	2.731539	5.550704	2.8576	4.363418	6.197726	2.56425	3.586152	2.475446	5.30508	5.829989
GSM1523819	303	1	2.726477	2.497494	3.200986	2.55244	6.259799	5.154681	4.0774	4.170453	4.195383	2.673827	3.079558	2.519601	7.598362	4.371594	3.010628	4.795772	6.285485	4.006368	4.112577	2.665308	4.421665	2.446924	4.264538	7.725631	2.805692	3.632889	2.702134	4.373135	5.511589
GSM1523820	711	1	2.36815	2.437274	2.992608	2.60672	4.578648	6.340764	4.247846	5.123106	3.296031	2.640917	2.983861	2.538866	7.69449	3.286227	2.630825	6.438365	6.171632	3.844431	4.455533	2.577391	5.044773	2.636791	3.280528	7.410137	3.004035	3.299918	3.04213	4.889085	5.592563
GSM1523821	2133	0	2.67628	2.363529	3.057522	2.62693	5.802883	4.833649	3.753346	5.511759	3.05972	2.801954	3.436006	2.497579	6.079952	4.299415	2.880889	5.508798	5.218432	5.269017	4.457208	2.506904	4.517381	2.732971	3.172235	5.837585	2.678375	2.896145	2.665745	6.403298	5.425631
GSM1523822	2129	0	2.525654	2.648286	3.044648	2.538335	4.955897	5.013737	5.151514	4.020023	3.196936	2.713323	2.435228	2.723123	7.373825	3.91116	3.300275	6.588916	6.336016	4.397876	4.884202	2.558231	4.961317	3.04613	2.856761	6.799712	2.558636	3.075844	2.798044	5.938647	5.60989
GSM1523823	2127	0	2.586326	2.444632	3.204263	2.541245	5.526804	4.209645	4.271329	4.213587	2.95328	2.729118	3.102585	2.41003	6.975946	4.316136	3.348032	5.914729	6.023993	4.641464	4.643165	2.548779	5.17061	2.566078	2.092828	6.421251	2.722351	3.469169	2.665246	6.224031	5.901
GSM1523824	2120	0	2.68264	2.472959	3.130007	2.63439	4.971521	4.418202	3.331896	5.197021	4.291563	2.781227	2.642677	2.520012	6.73721	4.663032	3.335725	6.263806	6.279004	5.00576	4.898675	2.605999	5.089871	2.653108	4.688925	5.910571	2.769405	3.00343	2.644435	5.435039	6.277778
GSM1523825	120	1	2.718501	2.483404	3.034076	2.692572	4.965062	6.119197	3.48379	4.655907	2.824887	2.76353	3.386518	2.749931	6.786524	4.05934	2.586461	6.808306	7.64658	4.411003	4.174569	2.741451	5.044773	2.978462	2.195375	6.912702	2.813846	3.087263	2.78898	6.649784	5.797992
GSM1523826	81	1	2.845021	2.434227	2.574058	2.526011	5.10783	4.704075	4.249163	6.36228	3.484957	2.647071	2.367573	2.480458	7.565738	4.107625	2.616052	6.485844	5.953593	3.93679	4.433472	2.602369	4.434288	3.409783	4.756282	6.479536	3.844936	2.96233	3.038549	5.363467	5.617181
GSM1523827	2101	0	3.202163	2.648758	2.800573	2.567726	5.318626	5.162986	4.621929	4.515949	3.820394	2.588009	2.158423	2.764923	7.101523	2.308037	3.483381	5.952327	5.473198	4.294461	4.791577	2.650119	4.103959	3.07484	4.569474	6.445772	2.794488	2.948786	2.881525	5.005541	5.871252
GSM1523828	176	1	2.606863	2.687131	2.684279	2.613072	4.545563	6.037449	4.353009	4.819418	3.229122	2.81989	2.004106	2.649663	8.46604	3.26011	2.709827	7.218471	6.421486	3.912209	4.484415	2.680601	3.965578	2.853448	4.138128	7.533602	3.344848	2.718565	3.418072	4.564881	5.641939
GSM1523829	2095	0	2.94664	2.489238	2.733191	2.653801	5.114847	4.119512	4.11253	4.661054	2.780298	2.96996	2.669584	2.669653	7.968184	3.894253	2.820061	6.830497	5.920238	4.606851	4.020597	2.760464	4.100901	2.551415	4.632142	7.419407	2.741729	3.140923	2.664869	4.960761	5.830653
GSM1523830	1603	1	2.668403	2.268314	3.053505	2.681122	6.288391	4.283325	4.393788	4.342262	3.326403	2.698113	3.463755	2.687641	6.421259	4.679885	3.590627	4.647846	5.396617	4.796301	4.431019	2.711522	5.164859	2.362487	3.912314	5.860674	2.640061	3.153739	2.453697	5.75098	5.947011
GSM1523831	927	1	2.991203	2.445361	3.175389	2.728092	4.661345	5.033662	4.022009	7.750051	4.540041	2.66501	2.45695	2.491327	8.603623	3.978761	2.76486	6.379437	7.316291	4.402638	5.080082	2.550894	4.649009	2.653463	5.23967	7.16237	2.79767	2.919407	3.047909	4.785092	6.061091
GSM1523832	530	1	3.022146	2.663754	2.508331	2.941507	4.901584	5.135125	3.450975	4.953887	3.916157	2.875373	2.152087	2.518317	8.185127	2.655232	2.553935	7.036177	6.034236	4.589126	5.039162	2.516258	3.490494	3.797553	5.10381	6.72644	2.58183	2.83992	3.937799	5.195878	5.73815
GSM1523833	266	1	2.611249	2.676754	3.274076	2.61323	5.239779	6.288787	4.608046	4.556806	3.29649	2.619818	3.481152	2.780455	7.447802	3.870545	2.543109	5.628302	6.573084	4.505368	5.177754	2.607192	4.353346	3.075896	4.87342	6.836185	2.682651	3.132355	2.696729	4.96877	5.967055
GSM1523834	1337	1	3.222205	2.677242	2.700002	2.520352	5.481794	4.770166	4.311785	4.313123	3.779338	2.616779	2.273923	2.456177	7.021426	3.13917	2.643976	6.34289	5.306312	4.386811	4.680648	2.567121	3.922506	3.241777	4.060562	6.253149	2.886689	2.953391	2.897579	5.151595	5.352145
GSM1523835	2079	0	2.584834	2.754391	2.62959	2.775124	4.157027	5.272793	4.210271	6.281609	3.147851	4.308028	2.302428	2.428003	8.502729	2.319109	2.348012	6.545185	6.340092	5.001906	4.285835	2.468109	4.093119	3.254636	4.685101	7.126399	2.981645	2.584217	4.564775	5.150404	6.113402
GSM1523836	2077	0	2.515935	2.569502	2.653491	2.529661	5.017409	4.289864	4.32789	4.027402	3.072598	2.633805	3.405883	2.936236	7.193086	1.702986	3.393695	5.817566	5.895724	5.522027	5.933112	2.57028	4.522677	2.73546	5.618421	6.868898	2.725228	4.170649	2.668204	5.086891	6.207511
GSM1523837	805	1	2.725847	2.38274	2.974136	2.606143	5.541465	4.781513	4.533551	3.874756	3.418743	2.763113	3.15501	2.421324	6.822125	2.569257	3.185394	6.125317	5.998528	4.400255	5.26286	2.8661	5.216881	2.834812	3.468559	5.835379	2.477066	3.273822	2.820116	4.063042	6.025024
GSM1523838	310	1	2.746102	2.63517	3.067645	2.585423	5.34642	4.153211	4.93614	3.596087	2.967033	2.704218	2.890098	2.554489	6.965473	3.706314	3.182911	5.960584	6.351447	4.045734	5.63277	2.542933	6.022737	2.863739	1.888373	6.420399	2.524776	3.528157	3.032195	5.224361	6.043937
GSM1523839	2074	0	2.798923	2.471608	2.773357	2.560523	5.133616	4.753443	4.567022	4.884255	3.79103	2.689623	2.470473	2.646219	8.081647	3.175527	2.610336	6.675045	5.91705	4.414118	4.626014	2.650818	4.416747	3.124279	4.111558	6.386477	2.594212	3.522082	2.880457	4.856784	5.01429
GSM1523840	685	1	2.659461	2.778147	3.452699	2.453277	3.836366	5.171021	3.772473	6.302249	3.658719	2.70521	2.054428	2.556284	7.975356	2.355718	2.73796	5.961749	6.265647	4.110769	5.376041	2.644219	4.013139	2.631485	3.813392	6.233357	2.926668	3.239711	5.961173	4.175866	6.188853
GSM1523841	1262	1	2.55075	2.815199	3.236465	2.601619	5.145728	5.489032	3.964952	5.073977	3.731023	2.595988	2.98203	2.817588	7.313784	3.573501	3.068984	5.317068	6.53289	5.289009	4.40541	2.736817	4.880753	2.628651	5.117954	6.490591	2.496607	3.441178	2.676836	5.358022	5.8678
GSM1523842	1462	1	2.904956	2.782781	2.765244	2.60134	5.374805	5.065826	4.016177	4.883348	2.966101	2.769352	2.05534	2.328835	8.370156	3.755767	3.011108	5.90473	5.897977	4.394883	4.494048	2.535748	4.178251	4.179829	4.597302	6.575286	2.55002	2.980588	3.939472	5.125895	5.902493
GSM1523843	776	1	3.258689	2.424107	2.77655	2.735908	5.291906	5.066901	5.226548	4.931347	3.874106	2.593721	2.216163	2.680353	7.817487	3.552664	3.18187	6.357097	5.463218	4.88422	4.273507	2.519734	4.56785	2.833069	4.825617	7.965659	2.659561	3.283554	2.681481	5.352608	5.84729
GSM1523844	2067	0	2.473537	2.495592	2.770081	3.33401	4.989636	6.027645	3.969291	6.164296	4.555605	2.678597	2.503425	2.60963	8.324269	3.086467	2.766567	7.29007	6.551284	3.351627	4.559996	2.573707	4.668322	5.442105	4.427711	7.441071	2.253528	2.487946	3.16975	4.648873	5.956761
GSM1523845	290	1	2.704548	2.532417	2.453947	2.500188	4.378635	5.260373	4.314325	5.702839	4.018051	2.722116	2.71745	2.49716	8.260453	3.155354	2.839186	6.554058	6.022854	4.447925	3.585553	2.630061	4.210308	3.563667	4.640705	6.479536	2.636122	3.166732	3.74257	5.731588	6.031084
GSM1523846	2051	0	2.631084	2.688921	3.140427	2.575113	5.217125	4.583454	4.002282	4.986144	4.171307	2.713531	3.147933	2.678646	7.625048	3.464478	3.726824	6.112063	5.881103	4.810856	4.539874	2.6433	4.787783	3.185677	3.286666	6.690684	2.715667	3.468498	2.595106	5.634654	6.260241
GSM1523847	2044	0	2.641182	2.498095	3.41336	2.665957	5.186216	5.07292	5.399003	4.326475	4.101878	2.712122	3.698034	2.711499	6.957605	3.144098	3.264224	7.312792	5.741796	5.247473	5.276954	2.694735	5.028914	3.006205	3.690156	6.562449	2.742575	3.298442	3.677721	5.62198	6.45597
GSM1523848	2044	0	2.6306749	2.3984993	3.0006926	2.5558793	5.9421408	4.750752	5.1708564	4.7021465	3.6657556	2.6053679	2.9749495	2.8912435	7.4219439	4.2501593	3.7347907	6.2071722	5.4330255	4.2505744	5.8396686	2.7672854	4.643533	3.4763091	2.2554609	5.7445375	2.8117869	3.3957445	2.5095535	6.7985973	6.4804298
GSM1523849	841	1	2.659461	2.66915	2.407028	2.564015	4.635963	5.302269	4.134797	6.738228	3.880716	2.642565	2.296271	3.178094	8.495946	2.532137	3.014587	7.479307	6.391425	4.257188	5.066968	2.672494	3.868584	4.758896	5.670077	6.723537	3.374195	2.936319	4.715712	5.733892	5.87467
GSM1523850	1092	1	4.020816	2.720794	2.846938	2.717148	5.111005	6.348388	3.764889	5.577362	4.787162	2.776666	2.725666	2.48792	8.006399	2.926393	2.773433	6.523936	6.753836	4.328024	4.686633	2.679098	4.355108	3.926355	5.659041	6.672487	3.006833	2.698325	2.809991	4.879704	5.757112
GSM1523851	2017	0	2.768502	2.610634	3.803833	2.759866	5.560924	4.27161	3.744205	3.607939	2.922969	2.759178	3.001896	2.580802	6.51089	4.058171	3.206264	5.549555	6.096063	4.507427	5.669935	2.61673	5.385494	2.993014	2.628492	6.312049	2.599422	4.379705	2.429701	6.026231	6.034689
GSM1523852	930	1	2.831219	2.574796	3.019602	2.541382	5.646913	4.171882	4.651447	4.031514	3.320566	2.711485	3.013478	2.706578	6.593567	2.901765	3.070417	6.333582	5.745423	4.183618	4.38252	2.550013	4.416078	2.713018	4.425555	6.893858	2.941588	3.117952	2.829634	5.28505	5.573864
GSM1523853	2002	0	2.716553	2.712881	3.134893	2.803993	6.022726	4.79555	4.721256	6.471603	3.097449	2.669958	2.54659	2.360819	7.298864	3.690751	2.972811	5.968947	5.823808	4.577521	4.68532	2.571316	4.008295	2.809317	5.047134	6.972026	2.734684	3.331312	3.955601	4.835842	6.073427
GSM1523854	2002	0	2.740195	2.476833	2.82856	2.573508	5.447322	3.868545	4.466207	5.854653	3.965284	2.664032	2.327844	2.624855	7.58189	2.013994	2.48524	6.535465	5.984038	4.450734	5.610054	2.621545	4.199947	2.624271	4.853682	6.359473	2.520113	2.88637	2.891551	5.54457	5.899704
GSM1523855	658	1	2.780258	2.525365	3.70859	2.471281	5.257236	4.971139	3.98445	4.722866	3.313346	2.601512	3.362737	2.736554	7.054946	3.271742	3.117427	5.20279	6.750234	4.138569	6.120017	2.558382	5.031959	2.421694	3.012731	6.598165	2.304587	3.439013	4.6436	4.694073	5.593286
GSM1523856	1986	0	2.69489668	2.4755314	3.69402752	2.59620071	4.47413413	4.94483079	2.60063717	4.71157512	3.48996992	2.69149638	2.86290989	2.74238315	6.82212486	3.31647645	3.42871575	6.79016368	6.80572102	4.03135768	5.34780388	2.47400946	3.68072792	2.67706962	5.32753235	6.27797649	2.65698537	3.31627204	2.70436215	5.41385577	6.24204159
GSM1523857	433	1	4.166576	2.66004	2.618464	2.571487	4.532593	6.65683	4.696137	5.402853	3.726509	2.760023	2.288968	2.67225	8.244854	2.788982	2.963289	6.840978	6.631008	3.579621	5.369072	2.61977	5.278323	5.498055	5.107257	6.638142	3.401412	3.237236	3.804479	4.936909	5.528324
GSM1523858	513	1	3.8755146	3.3426482	2.9935966	2.5701697	4.821183	5.8947492	3.2519219	6.2204311	3.9845571	2.876744	1.6500064	2.8225224	8.3661681	0.7735298	2.1462661	6.6048181	7.6532989	3.0881958	5.4975713	2.8274036	4.3324515	4.8492273	6.0315006	6.0871351	4.8038312	3.1617233	4.3190607	3.8771862	4.9119583
GSM1523859	1594	0	2.930565	2.449006	2.832515	2.554476	5.117415	5.493802	4.272657	5.314447	4.228557	2.841048	2.797528	2.603713	7.678554	2.926393	3.214132	6.672128	6.332698	4.71215	4.627088	2.642838	5.32664	2.725577	5.593797	6.28814	2.43188	3.55065	2.737863	5.252835	5.922438
GSM1523860	1266	1	2.583193	2.483404	2.910456	2.599892	5.409537	4.178353	4.274532	3.998232	3.450209	2.648506	3.201295	2.651928	6.404348	3.232164	3.287772	5.836605	6.174753	4.725122	4.658619	2.552405	5.003389	2.935044	2.004582	5.970459	2.661749	3.896929	2.676316	5.871835	5.9705
GSM1523861	1944	0	2.802485	2.647376	2.99103	2.723971	5.555074	4.81267	4.448234	5.398192	3.170058	2.749504	3.280354	2.538408	7.540688	3.984203	3.31512	5.685846	5.627593	4.596121	4.35951	2.653087	4.472084	2.940762	4.410868	6.536928	2.537764	3.855427	2.757731	5.713059	5.873975
GSM1523862	630	1	3.758778	2.841445	2.773357	2.596792	5.027026	5.095128	4.299591	5.346795	2.999865	2.818405	2.598005	2.496214	8.413174	2.524836	3.062698	6.01512	6.937765	3.128924	4.608998	2.661161	4.691216	3.659301	5.778531	6.27465	4.340125	2.977118	3.4543	4.525794	5.263614
GSM1523863	1937	0	2.784751	2.66599	3.257149	2.512474	5.61465	5.658826	4.840457	3.874756	2.765026	2.709014	3.242724	2.761422	6.307396	4.122105	3.231299	5.710263	5.882273	4.463954	5.960678	2.675698	5.133598	2.839282	1.546235	6.143788	2.668013	3.589333	2.847405	7.307627	6.137272
GSM1523864	1919	0	3.019452	2.420839	3.167044	2.72795	5.040888	4.098307	4.793354	4.636429	3.997909	2.731395	3.269733	2.650117	7.216068	4.497056	3.093456	5.468465	6.215921	4.403048	5.245658	2.463449	4.683817	2.525332	5.331591	6.729493	2.953763	3.217872	2.940096	5.572796	5.852818
GSM1523865	1911	0	2.616178	2.73505	2.908879	2.506508	5.223706	4.24796	3.529594	4.445055	3.86489	2.586974	3.29676	2.788774	6.615155	3.864063	3.239686	5.239793	6.231777	4.508227	5.342926	2.556585	5.033082	2.866957	3.492952	6.236656	2.505825	3.007339	2.523769	4.998404	6.092553
GSM1523866	131	1	2.430369	2.668729	2.920005	2.494959	4.653795	5.148259	4.173802	5.893738	3.696978	2.731591	2.198946	2.389806	8.397699	3.191963	2.749866	6.640619	6.493673	4.664992	4.109681	2.634135	4.519137	2.980011	4.901529	6.736067	3.004852	2.945602	3.227762	5.262522	5.809454
GSM1523867	998	1	2.933316	2.657226	3.097458	2.436451	5.485182	4.296291	4.118409	4.122774	3.111939	2.766544	3.136934	2.507712	6.91142	3.446177	2.588432	6.323681	5.964871	4.441054	4.547323	2.585848	4.818276	2.770145	4.617447	6.744742	2.675157	3.130138	4.208438	5.693324	5.735527
GSM1523868	1898	0	2.509033	2.769834	2.763564	2.484127	5.496859	5.713842	5.887782	7.185345	4.514547	2.784664	2.816187	2.649263	7.90157	4.020766	3.024806	6.461948	6.005916	4.839901	4.803551	2.427753	5.333348	3.164019	3.924044	6.529385	2.668013	3.814649	3.321589	6.320129	6.129902
GSM1523869	1876	0	2.7796	2.52777	3.153367	2.562403	5.552482	5.009269	5.310218	4.383115	3.861552	2.77844	2.886588	2.53573	6.932622	4.344354	2.816572	6.517652	4.982085	4.221302	4.99392	2.525263	4.900383	2.745768	4.585273	8.319903	2.547461	3.475909	2.533454	5.125489	5.792558
GSM1523870	1874	0	2.599483	2.69113	3.572951	2.625892	5.367446	4.04313	4.771404	3.893509	2.932793	2.718764	3.978002	2.710204	7.012391	4.571795	3.072364	5.173031	5.594854	5.189341	5.47134	2.508387	5.360937	2.797999	3.336978	6.403853	2.633481	3.492118	2.788338	6.177604	6.294783
GSM1523871	1871	0	2.734065	2.520575	3.048558	2.562696	5.876043	4.123278	4.637445	4.90494	3.416987	2.725648	3.108172	2.684464	6.813732	3.605766	3.313072	5.392374	5.75435	4.776452	5.048615	2.565344	5.275185	2.806683	4.828117	6.470554	2.640957	3.477048	2.690225	5.436759	5.714805
GSM1523872	451	1	2.777828	2.735467	3.095951	2.414315	5.375423	5.687957	4.577341	5.515912	4.012069	2.711286	3.132515	2.573883	7.563529	3.51986	3.083095	7.028816	5.805892	4.212326	4.30757	2.594138	4.599432	2.81725	4.20177	7.060789	2.501518	2.898665	2.68726	5.495097	5.322749
GSM1523873	721	1	2.80533	2.523	3.390776	2.479332	5.871884	4.238055	4.925072	4.768159	3.248132	2.604982	2.415661	2.684464	7.470524	3.172963	2.839186	5.330376	5.745872	5.360488	5.387045	2.482223	4.758798	2.601983	4.924646	6.496318	2.745826	3.802258	2.724491	6.424857	5.825885
GSM1523874	1863	0	2.553415	2.59234	3.565892	2.597548	5.511249	5.305515	4.33163	6.210802	3.898851	2.578407	3.518745	2.510263	7.726656	4.073497	2.772954	6.579612	6.810054	5.069444	4.900584	2.600513	5.078514	3.307053	2.777906	6.994514	2.93491	3.180433	2.683915	4.667785	5.644458
GSM1523875	254	1	2.752503	2.709915	3.441497	2.788553	4.485654	4.997211	4.035554	5.745194	3.307906	3.749735	2.491759	2.622225	9.02905	3.671314	2.741891	6.069575	6.241841	5.038921	4.964199	2.426256	5.33211	2.547953	5.27094	5.910571	2.639148	2.977118	3.30519	4.810129	5.943593
GSM1523876	1857	0	2.753383	2.628869	3.027572	2.511599	5.392536	4.27161	5.000437	4.079179	3.241556	2.690237	3.070632	2.730335	6.424806	4.115631	3.215112	6.301797	5.656665	4.572426	4.488443	2.456154	4.706262	2.888904	3.726837	6.507842	2.531133	3.196207	2.497227	6.460118	5.629914
GSM1523877	393	1	2.564194	2.442487	3.441497	2.668292	4.6024	6.717685	4.962571	4.964104	3.526962	2.601313	3.154264	2.586846	6.326658	5.138766	2.814627	4.846208	7.243077	4.517804	4.845585	2.507794	4.535243	2.671197	3.23121	6.768098	2.710384	3.307153	2.782418	4.529481	6.169501
GSM1523878	1856	0	2.931671	2.404287	2.918382	2.765506	5.595279	4.797191	4.655881	4.662274	3.713764	2.699153	3.242724	2.529076	7.218873	3.536087	3.411562	5.515485	5.565098	5.038415	5.418204	2.510694	5.53718	2.792749	4.672157	6.43346	2.713633	3.535061	2.622738	5.527355	5.899704
GSM1523879	1835	0	3.172738	2.645593	2.818773	2.419987	5.279011	4.817057	5.170288	5.164171	3.612036	2.62343	2.703911	2.567715	7.120154	4.161693	2.687934	5.848008	6.12882	4.844827	4.852491	2.417828	4.936427	2.864093	4.483481	6.500726	2.819444	2.906853	2.908435	5.484977	5.535752
GSM1523880	1829	0	2.783494	2.332235	3.311077	2.492244	5.378014	3.836805	4.259805	4.455903	3.201411	2.730381	2.674952	2.790616	6.315662	5.015438	3.064179	5.046736	5.757919	4.979531	5.861696	2.593356	4.661593	2.989946	3.32098	6.075218	2.63654	3.583703	2.690851	6.045054	6.573117
GSM1523881	447	1	2.500299	2.46016	3.352068	2.975689	4.921782	5.451191	5.525707	3.954745	3.861066	2.730381	2.715669	2.580413	8.688531	4.010255	3.553754	5.41105	6.599047	4.520796	5.141386	2.577754	5.427715	3.482044	4.541865	5.705702	2.537277	3.391109	2.846206	4.941176	5.24472
GSM1523882	1821	0	2.698839	2.408994	3.992947	2.726901	5.713554	3.833086	5.461616	4.221529	3.225439	2.586974	3.320011	2.86926	7.124729	4.803606	3.032646	3.410621	6.219888	4.909735	4.756713	2.514839	5.22925	2.933522	5.051648	6.793985	2.754607	3.259561	2.413891	5.954467	6.823766
GSM1523883	1186	1	2.766308	2.396739	3.536822	2.720024	5.78361	4.733732	4.102366	4.565359	3.216243	2.704617	3.619019	2.808658	7.10699	4.386945	3.258837	4.739878	5.610358	4.106527	4.708646	2.748557	6.132342	2.434074	4.415815	5.746628	2.714028	4.000402	2.418903	6.153002	5.839592
GSM1523884	1813	0	2.874107	2.504069	3.094297	2.483823	5.348355	4.723518	4.825824	4.921164	3.820394	2.716708	2.246545	2.517426	7.429301	3.249844	2.47202	5.927187	6.106835	4.798197	5.245082	2.578362	4.283699	2.856509	4.954809	6.468728	3.209561	3.038489	2.751574	5.109646	5.587897
GSM1523885	1807	0	2.69928	2.483404	3.207511	2.636935	5.619984	3.673942	4.520928	4.293857	3.266816	2.613088	3.618201	2.501934	6.825418	4.042298	3.016551	5.291605	5.902829	4.486405	5.135366	2.528894	5.335776	2.718779	2.976314	5.770649	2.662633	4.346923	2.580156	6.942606	5.85747
GSM1523886	168	1	3.923893	2.63901	2.772589	2.616174	4.795486	5.886543	3.986314	6.499529	3.940711	2.721523	2.801968	2.747256	8.439746	2.913276	2.655705	7.32612	6.390836	3.404899	4.432935	2.527564	4.440382	3.764365	5.100922	6.43346	2.770621	3.450513	3.75364	5.120925	4.963676
GSM1523887	1806	0	2.610573	2.564717	3.541557	2.748937	5.82901	4.12702	4.314906	4.779238	2.760045	2.763749	3.694477	2.520797	6.935316	5.577178	3.35641	6.716126	5.841187	4.985417	5.99325	2.830056	5.66163	3.285593	2.251624	6.040389	3.047871	2.46294	2.528981	6.278406	6.310365
GSM1523888	1797	0	2.640343	2.565769	3.174567	2.543598	5.361317	3.966246	4.862914	4.448751	2.978883	2.763113	2.76177	2.615746	6.211672	4.032356	2.752657	5.829274	5.861621	4.654338	5.802271	2.648063	4.681953	2.704644	2.171974	5.744538	2.80974	3.790932	2.644702	6.694673	5.550128
GSM1523889	1790	0	2.993413	2.394168	3.187378	2.566682	6.085785	5.173839	5.163007	4.17553	2.972887	2.727654	2.636359	2.613095	5.934855	4.081104	3.156748	5.888792	5.983448	4.799211	6.101327	2.410292	5.028914	2.754722	4.849032	7.019205	2.836635	2.967596	4.033792	5.228839	5.520234
GSM1523890	1787	0	3.509185	2.414796	3.12259	2.519726	5.303757	4.059488	4.276504	4.327345	3.254908	2.659893	3.001064	2.585955	6.50724	2.960389	3.557864	5.311986	5.612729	4.675369	5.034535	2.545478	4.722735	3.01815	4.482087	6.455659	2.703073	3.101588	2.800625	4.878564	5.288069
GSM1523891	1787	0	2.57291	2.886308	2.775783	2.650155	4.982996	5.12539	4.595784	4.764701	3.285481	2.668945	3.267997	2.809554	7.526985	2.944323	3.027198	6.729975	6.096685	4.237765	4.179464	2.703747	4.579548	2.825192	3.591855	6.979422	2.745414	3.857216	2.951477	5.601695	5.326491
GSM1523892	1784	0	2.634525	2.371536	3.65673	2.775269	5.517601	4.4846	3.65718	4.313123	3.026082	2.729537	4.284503	2.528658	7.022413	5.087878	3.768781	6.723615	5.969472	4.374981	5.709332	2.777355	5.064049	3.371357	3.6476	7.11145	4.248079	2.477339	2.727926	5.627709	5.647183
GSM1523893	603	1	2.713688	2.548424	3.437446	2.688827	4.447858	4.343029	4.112531	7.325529	3.684659	2.666851	3.284044	2.79721	7.59948	3.773604	2.994474	6.903777	6.718371	4.991454	5.391084	2.431552	4.292692	2.750903	4.137399	7.352644	2.792028	3.456043	2.696845	5.419291	5.904549
GSM1523894	1073	1	2.653111	2.613184	3.00698	2.570916	5.775128	5.641863	5.589792	6.047328	4.227537	2.721728	3.313052	2.66019	8.217402	3.167908	3.115516	5.23223	6.224885	4.925535	6.492998	2.6488	5.229882	2.96451	4.79121	6.616988	2.763212	3.326343	2.53623	4.730699	5.689153
GSM1523895	1771	0	2.464963	2.673535	3.205908	2.640431	4.572499	6.255245	3.683889	5.007885	3.66012	2.666648	3.308475	2.818064	7.36015	4.385725	2.791037	6.304761	6.19016	5.066516	5.459868	2.527127	4.819517	2.745381	2.273633	6.337726	2.760414	2.800579	2.625247	5.796256	5.896236
GSM1523896	841	1	2.651103	2.760781	3.462473	2.630183	5.747479	4.192412	4.2396	4.471617	3.451083	2.620013	2.814345	2.58176	7.442347	4.038692	3.152673	5.047467	6.614209	4.800187	5.154355	2.554235	4.789414	2.832026	4.815428	6.601723	2.695385	2.856642	2.56858	5.982459	6.268213
GSM1523897	1766	0	2.71306	2.434993	3.633474	2.595766	5.279703	5.349546	5.214835	4.605257	3.253083	2.691686	3.800345	2.934118	7.929006	3.690751	3.720823	5.715018	6.182078	4.999063	5.551313	2.623003	5.373243	3.090796	1.979912	7.66184	2.686119	4.200457	2.754681	5.324909	5.873317
GSM1523898	1765	0	2.567354	2.533598	3.38357	2.751997	5.37741	4.918236	4.18876	5.183086	3.375965	2.645047	2.858334	2.742383	7.213173	3.839416	3.547716	5.149202	5.80378	4.14881	4.842042	2.721498	4.467811	2.830574	3.428245	6.397752	2.724045	3.722385	2.48213	5.03362	6.265967
GSM1523899	1742	0	2.565247	2.474292	3.182559	2.733268	4.872022	4.054698	5.425271	3.855328	3.2444	2.722116	3.272361	2.89994	6.783318	2.066447	3.327821	7.310617	6.238031	4.476406	5.362337	2.62946	4.493043	2.868403	5.01576	6.152621	2.797254	3.879681	3.771332	5.283912	5.854806
GSM1523901	1724	0	2.471827	2.609029	3.124175	2.624112	5.455218	4.053639	4.902519	3.895549	3.006871	2.662617	3.418543	2.829601	6.653738	2.462342	3.466265	5.555428	5.673482	4.54899	5.427785	2.674983	5.226187	2.81725	2.302057	6.013334	2.891891	3.635026	2.583665	6.035388	5.990574
GSM1523903	1194	1	2.48576	2.631422	2.696876	2.603775	5.258559	4.403467	5.924496	4.467526	4.155318	2.681603	3.292341	2.522014	8.70309	2.433438	3.157237	6.912834	6.238031	3.607852	5.375192	2.550457	5.486209	3.763194	4.977535	7.752112	5.233653	3.603159	2.897066	4.743366	5.563506
GSM1523904	1661	0	2.831219	2.618118	2.619288	2.644464	5.678005	4.813232	4.694197	4.773436	3.374584	2.635233	2.907779	2.742383	8.185127	2.401617	2.868818	5.716662	5.881103	4.902524	4.440149	2.658707	4.358128	2.86047	4.790543	7.0725	2.513221	3.547391	3.083993	4.995641	5.804843
GSM1523905	1659	0	3.031044	2.557206	2.76611	2.491028	5.522864	4.750752	4.955577	4.495142	3.586307	2.677578	3.015248	2.512509	7.699412	2.512449	3.464238	4.967183	5.503566	4.690146	5.74355	2.645391	4.787783	2.778261	5.017845	6.516702	2.969697	3.726059	2.447865	5.633398	5.622569
GSM1523906	1659	0	2.700123	2.677242	3.02602	2.639444	5.858492	4.094559	4.549869	4.56583	3.466291	2.690667	3.102585	2.923003	7.557677	3.190722	3.541299	5.612191	5.904982	4.847796	5.088462	2.68045	4.832315	2.873131	3.661994	6.321459	2.746255	3.313044	2.597391	5.933485	6.414713
GSM1523908	1652	0	2.55539	2.692471	3.06378	2.572807	5.195129	4.654321	4.950383	4.103031	4.11113	2.675444	2.861939	2.802849	7.199767	2.483827	3.276998	6.158387	5.738099	4.320094	4.83531	2.735882	4.485169	4.426838	4.139595	7.301084	2.754607	4.150928	2.510402	6.758225	6.449134
GSM1523909	1636	0	2.587764	2.661887	3.16546	2.560247	5.578551	4.041031	4.875894	4.710718	2.611536	2.600089	3.242724	2.842934	6.123244	3.013337	3.439674	5.642618	6.335319	4.346671	5.326141	2.761718	4.226489	2.901152	2.02901	6.673462	2.980848	3.918355	2.549993	6.328081	6.407271
GSM1523910	1630	0	2.607072	2.650726	2.876808	2.689741	5.623202	4.264677	4.269988	4.158121	3.318312	2.679764	3.771311	2.698222	6.769483	3.784377	3.408038	4.927924	6.239224	4.895012	5.186851	2.638321	5.54529	2.657684	2.324601	5.968173	2.838258	3.749513	2.601033	6.872938	6.389567
GSM1523911	655	1	2.526501	2.945725	3.116859	4.34952	5.519591	3.864439	4.709147	4.440887	3.82091	2.609219	3.077786	2.757012	7.990122	2.319109	3.546755	6.796923	5.146891	4.481592	4.815207	2.718207	4.335575	2.82625	5.082731	7.022417	3.065568	3.78442	3.609176	6.392911	5.518879
GSM1523918	844	1	3.167476	2.62158	2.702364	2.543007	4.792872	6.16695	3.864517	5.20019	3.383895	2.780039	2.261606	2.99983	8.062736	2.266645	2.886868	6.957705	7.310091	4.004499	4.811681	2.786586	4.641687	3.857336	5.341016	7.036941	3.87387	2.722852	4.041866	4.696387	5.073834
GSM1523919	2523	0	3.461207	2.648758	2.885682	2.375608	5.566194	4.671495	4.459795	3.997045	3.240234	2.678192	3.042501	2.570296	7.105243	4.058171	3.269462	5.552473	5.480528	5.005269	5.593208	2.589454	5.112125	2.958134	4.87196	7.090359	2.754607	2.715652	2.43415	5.491543	5.223854
GSM1523920	280	1	2.86549	2.537944	2.845419	2.692447	5.846396	5.276711	5.146307	4.555542	3.127637	2.651118	2.888337	2.656221	6.693245	3.702461	2.772438	6.229751	5.667858	4.093365	4.536523	2.659135	4.802416	2.871665	5.242677	6.718643	2.552749	2.86302	2.718887	4.939281	5.525569
GSM1523921	2499	0	2.574205	2.486706	3.461698	2.441855	4.337054	5.077916	4.064803	4.396749	3.39651	2.777666	2.86291	2.658818	6.637532	4.705714	3.618353	6.27955	6.182078	4.563827	4.380606	2.647921	5.163599	2.873836	2.123782	6.672487	2.913349	3.460425	3.254815	5.365174	6.050961
GSM1523922	708	1	2.666203	2.806404	2.308926	2.387263	4.848984	5.58475	5.181191	5.493136	3.962006	2.625837	3.342618	2.469976	7.407334	1.677943	2.910725	6.4064	6.224293	4.91543	4.335138	2.663137	4.952971	3.324693	2.962391	6.499819	2.566875	3.072021	2.553118	5.499074	5.745559
GSM1523923	792	1	2.87654	2.448347	3.373012	2.561972	5.202416	5.282227	4.355565	4.854677	3.996123	2.828912	3.225882	2.767954	7.16975	3.513288	3.142119	6.933703	5.946323	5.093151	5.062591	2.56864	4.31671	3.001998	4.702663	6.644716	2.728472	3.005868	2.721537	5.079506	5.76046
GSM1523924	2466	0	3.246784	2.440207	2.864409	2.494186	5.553144	5.015939	5.019174	4.870365	4.042768	2.745926	2.80544	2.636697	7.436953	3.461813	3.222497	5.668722	5.589396	4.32503	5.563999	2.567577	4.450566	2.820774	6.06721	6.714862	2.793276	3.068337	2.739305	5.038131	4.939665
GSM1523925	189	1	2.732205	3.405208	2.313008	4.313427	5.132323	4.490453	3.967442	5.476584	3.367005	4.36056	1.746887	2.810915	8.806392	1.999956	3.190802	6.422118	6.28093	4.238423	4.85381	2.477259	4.958958	2.375601	5.241965	7.128831	2.740521	2.855225	3.808057	4.754322	5.901714
GSM1523926	2071	0	2.694668	2.568935	3.73238	2.527777	5.495556	3.540939	3.94125	3.76809	2.73695	2.742917	4.245732	2.543707	6.29707	4.725173	3.296768	5.751121	5.290693	4.690146	5.682488	2.538202	5.032497	2.399114	4.842112	6.903137	3.143899	2.923674	3.319295	5.435039	6.127759
GSM1523927	2423	0	2.678159	2.510863	2.879987	2.619483	5.467805	4.810539	3.971817	3.876416	3.241556	2.665809	2.888337	2.712369	6.947268	4.956921	3.113994	5.350286	5.922884	3.795987	4.694495	2.461906	4.523905	2.506019	4.960124	6.766223	2.818632	3.010212	2.622738	4.785092	5.317678
GSM1523928	1624	1	2.458055	2.281009	3.419857	2.675882	5.329057	8.477574	3.598	5.834463	4.047864	2.644429	3.575453	2.823879	8.188524	5.405271	2.95152	4.969346	6.249017	4.479212	4.330888	2.648063	5.525676	2.642262	4.611318	6.795863	2.693709	3.027385	3.046838	4.952226	6.072674
GSM1523929	2650	0	2.816604	2.332235	3.583602	2.592223	5.642458	3.740989	4.070416	4.610651	3.53205	2.693268	3.330707	2.542345	6.825418	3.702461	3.030775	5.274231	5.468692	5.014001	5.083174	2.501271	4.632624	2.412804	4.274136	6.681925	2.688232	3.212023	2.66002	5.839517	6.061091
GSM1523930	2356	0	2.892644	2.792237	2.953851	2.604806	6.261856	4.711459	3.787575	6.155565	3.908747	2.730572	3.272361	2.584328	8.25881	4.780133	2.595186	6.888844	5.156587	5.329911	6.39741	2.449299	5.167422	2.849276	5.137413	6.627549	2.784362	2.900496	2.781901	5.134289	5.864285
GSM1523931	2328	0	2.706992	2.826388	3.288652	2.604664	5.932074	4.240291	5.325639	5.021586	3.255365	2.677783	3.63736	2.490902	7.17553	4.453737	3.386745	4.682773	5.799689	5.344761	4.798691	2.590652	5.394745	3.028001	3.493289	6.918176	2.481716	3.074113	2.610233	6.651429	6.225827
GSM1523932	380	1	2.562293	2.704635	3.239566	2.564015	5.100931	4.622305	4.175146	5.526284	2.986583	2.63322	2.801091	2.661569	7.417985	3.055657	3.505802	6.520281	5.880535	4.419652	4.644581	2.500121	4.500278	2.29435	3.816437	6.970819	2.698808	2.901533	2.591756	5.416791	5.656166
GSM1523933	2258	0	2.497469	2.439438	3.720169	2.776689	5.54004	4.39065	5.147642	4.706446	2.963059	2.712327	3.733721	2.641132	7.404064	5.183223	3.248634	6.522076	5.61372	4.468717	5.113036	2.597712	4.607846	2.913628	2.656897	6.809702	2.869262	3.52746	2.685161	5.036828	5.856108
GSM1523934	384	1	2.646414	2.662854	3.072786	2.699796	5.601884	6.763109	4.418626	5.270804	4.136939	2.82174	3.612971	2.461454	8.178575	4.782736	3.166166	6.28626	6.576819	4.36269	5.278904	2.411158	5.131796	3.052547	4.989457	6.951081	2.509337	2.900496	2.646625	4.873917	6.065462
GSM1523935	2622	0	2.591175	2.800691	3.326386	2.576532	5.068094	5.858154	4.6406	6.075256	4.315747	2.760838	3.455722	2.499314	9.16495	2.645763	3.066071	7.629014	6.070899	3.520731	4.200141	2.688053	4.203061	3.202986	3.115547	6.539554	3.102158	3.019099	2.737599	4.953386	5.361127
GSM1523936	527	1	3.507217	2.494358	3.097458	2.610754	5.465862	5.953991	4.671935	5.433944	3.447459	2.659102	2.237759	2.824298	7.92217	3.115732	2.97235	6.310068	5.712962	3.978942	4.942315	2.713981	4.786102	2.820774	5.945946	6.986901	3.039296	2.721461	2.571842	4.515517	5.079442
GSM1523937	590	1	2.764177	2.565217	3.031687	2.720172	6.30575	5.579292	4.484676	4.835809	3.858347	2.458163	2.948322	2.429778	7.555347	2.63714	3.250072	5.464315	5.268436	3.777576	5.009609	2.469479	5.47625	2.517432	5.571226	6.263119	2.738508	3.193319	2.580997	6.219918	5.590537
GSM1523938	173	1	4.1443199	3.0813379	2.568475	2.4562228	4.080657	5.9374493	3.6109221	5.5201929	4.2613453	2.823192	2.2260255	3.0189006	8.557149	0.1530671	2.690386	7.339233	6.5943324	3.6954357	5.3751917	2.4614297	3.7568343	4.3589259	5.9360945	7.309748	4.8062453	2.6445309	4.2752041	4.4085754	5.4522446
GSM1523939	337	1	3.262104	3.246364	2.59682	2.653584	5.200469	5.854798	4.255321	5.846106	3.629748	2.724801	2.635436	2.613546	8.039514	2.140458	3.062698	6.38102	6.772715	2.774504	4.776275	2.813783	4.602412	3.450005	5.784376	6.538588	4.081711	2.812826	3.4716	4.558361	4.961901
GSM1523940	601	1	2.952249	2.50895	3.484916	3.684923	5.191909	6.11534	5.08212	5.165125	4.34233	2.785903	3.023476	2.971012	7.699412	5.284951	3.400645	6.126636	5.734598	4.926645	5.067246	2.532385	5.168702	3.696772	4.207469	7.924128	2.880651	3.016213	4.103115	5.003555	5.86021
GSM1523941	136	1	2.761435	2.672566	3.029241	2.769643	5.455218	4.44126	5.188299	5.413611	4.151539	2.589453	3.128072	2.929554	9.02905	2.717699	2.476554	5.804715	5.415309	4.678962	5.032319	2.579433	5.072581	2.480636	3.918715	6.853095	2.664211	2.568661	2.683292	5.380122	5.954044
GSM1523942	2108	0	3.164217	2.637147	3.14445	2.687229	5.559686	4.646252	4.939435	4.918995	3.258529	2.695456	2.823159	2.775159	7.806819	5.583511	3.243175	5.831608	6.097232	4.797245	4.400845	2.513303	4.694231	2.873483	4.752393	7.048708	3.018897	3.202654	2.675296	5.074342	5.536498
GSM1523943	166	1	2.613431	2.573726	2.84063	2.678071	5.32059	4.329848	4.384133	5.096249	3.818022	2.664215	3.069789	2.614422	7.97256	4.279922	3.029243	5.525599	6.206949	4.643637	5.472179	2.550013	4.789414	2.78126	5.324675	7.114891	2.891103	2.952668	2.747593	5.986171	5.778784
GSM1523944	2089	0	2.502391	2.625978	3.291029	2.797024	5.293895	5.28924	3.701018	4.29465	3.033361	2.640917	3.301198	2.382337	7.447802	3.798524	3.604178	6.140233	5.883901	3.832497	4.612262	2.466503	4.500585	2.85688	3.929697	6.722512	2.749162	3.253749	4.523028	6.474826	6.237636
GSM1523945	526	1	2.509501	2.841444	3.193743	2.821751	4.425996	6.251862	4.155275	5.598149	3.40879	2.639483	2.502486	2.641132	8.274386	3.224591	2.365908	7.485913	5.734598	3.808734	5.756198	2.60916	4.300432	3.264496	4.540363	6.998847	3.069147	2.992879	3.050879	4.322433	5.25921
GSM1523946	2068	0	2.5956	2.75477	3.057522	2.539072	5.185587	5.059206	4.852566	6.028656	3.944893	2.588214	2.867453	2.529531	8.688531	3.792143	2.970901	6.210097	5.587458	4.42341	4.876439	2.682055	5.093063	2.758703	5.141921	7.738757	2.635687	3.494359	3.140528	5.323282	5.849349
GSM1523947	2053	0	2.53506	2.380152	2.766788	2.541672	5.364278	3.812977	5.035817	3.15077	2.855919	2.708008	2.80544	2.589897	6.242762	5.239443	3.022399	4.916097	5.295222	5.391842	5.995111	2.460983	4.780729	3.827413	3.939596	5.954784	2.522871	3.721358	2.55921	5.902582	6.1071
GSM1523948	824	1	3.521857	2.799871	2.681233	2.502682	5.299123	6.488311	3.654049	4.924282	3.624625	2.6009	3.362737	2.794603	7.905898	2.991217	3.398587	6.361865	6.200643	4.840411	4.825812	2.51872	4.572146	2.70203	5.819848	6.161531	2.958793	2.998856	3.685878	4.346598	5.367448
GSM1523949	303	1	3.329978	2.884888	2.742863	2.488281	5.444062	5.600638	3.768083	6.393685	4.053804	2.720966	3.252868	2.916075	7.966768	2.692847	3.394749	5.995713	6.243716	3.698743	5.065569	2.84035	4.472599	4.077687	5.922602	6.563354	3.245819	2.657235	3.726069	4.828517	5.38828
GSM1523950	2046	0	2.550104	2.521177	3.571495	2.559192	5.232651	6.049819	3.515942	4.271088	2.945392	2.57971	2.951087	2.861737	6.690924	4.138261	3.26804	4.452662	5.597707	5.100694	6.377331	2.484537	4.801229	3.010597	4.049408	6.439686	2.531133	2.924419	2.653834	6.153002	6.416892
GSM1523951	1591	1	2.730527	2.491763	3.730706	2.561114	4.943551	4.309445	4.532945	4.519207	3.596946	2.710467	2.851233	2.612637	7.253746	4.156752	4.160601	5.465733	6.019555	4.658781	5.361745	2.756926	5.180493	3.268612	3.990323	6.275502	2.516481	3.884457	2.420567	6.091803	6.811848
GSM1523952	3026	0	2.919221	2.466609	2.641034	2.466843	6.064778	5.157352	4.39909	4.433974	3.763382	2.759178	2.720168	2.60963	7.538371	3.546281	3.097397	5.819801	5.352029	4.54292	4.875629	2.637352	4.120237	2.399114	5.882642	6.659935	2.872062	3.234803	2.66421	4.941565	5.415541
GSM1523953	2543	0	2.697754	2.824125	2.772589	2.690168	6.12934	4.312647	4.076808	4.99158	2.760532	2.604571	2.887479	3.008184	8.079969	3.099498	3.585679	6.195434	5.89193	4.779939	4.640718	2.574003	5.400292	2.625379	4.686813	6.07763	2.469703	2.782255	2.601033	4.936172	6.153921
GSM1523954	3026	0	3.055035	2.663289	3.963904	2.525863	7.469581	4.480752	4.983123	3.869471	3.430168	2.706581	4.508549	2.708832	6.624583	5.006225	3.633695	5.554949	4.705273	3.786701	4.441459	2.648063	5.58282	2.981437	4.855106	7.259086	2.556832	3.254117	2.294085	5.241589	5.110444
GSM1523955	1031	1	2.629621	2.413149	3.406069	2.478385	6.644854	6.469134	4.646221	4.286626	3.240638	2.702429	2.96711	2.706138	7.420995	4.170855	3.553754	5.585572	6.059299	2.291479	4.46508	2.842866	4.751065	3.135631	5.63099	6.654309	2.279866	3.266916	4.048193	3.877589	5.509719
GSM1523956	934	1	2.621425	2.584156	2.996874	2.909968	5.403683	5.600638	3.123816	6.526793	3.862598	2.711485	3.294099	2.651047	8.233007	3.414413	2.62895	7.425577	5.647904	4.110113	5.150375	2.558828	4.270485	2.295117	6.47073	6.771123	2.617355	2.722852	4.171157	5.245488	5.440117
GSM1523957	3019	0	2.767827	2.725834	3.224337	2.731568	6.71563	4.76034	5.390357	4.657666	3.775687	2.701607	3.690981	2.771346	6.876454	2.901765	3.025267	4.996213	4.943721	4.404213	4.96637	2.419213	5.134787	2.51226	5.724295	5.776998	2.838258	2.722497	2.619774	4.875038	5.769367
GSM1523958	3007	0	3.402946	2.651191	2.678912	2.731	5.309578	4.433237	4.428177	4.135333	3.870869	2.705793	3.212888	2.386758	7.387871	3.998618	3.064179	5.598912	5.557287	4.34221	4.574385	2.639388	4.959565	3.35287	6.059723	6.385552	3.015011	2.79129	2.647286	5.822527	5.737543
GSM1523959	523	1	2.826224	2.647819	3.556453	2.604079	4.577911	4.246281	3.602671	5.640034	3.997482	2.778247	3.072395	2.713284	6.95157	3.921458	3.279506	6.212137	6.065648	5.309452	4.914584	2.543084	5.005863	2.723648	4.625465	6.557735	2.907716	2.853794	2.858716	4.953386	6.321408
GSM1523960	2970	0	2.466625	2.713332	3.898589	2.636427	5.013563	5.448364	4.340636	5.677318	3.571475	2.712327	3.479369	2.594602	8.148403	4.568238	3.327821	5.840558	7.021067	4.821191	6.382183	2.494942	4.716686	2.723648	3.905239	6.365445	2.623394	2.686742	2.503886	5.607418	6.26239
GSM1523961	285	1	2.55075	2.838354	3.299738	2.87571	5.223706	4.548977	4.80283	5.922468	3.71693	2.804337	2.499771	2.679505	7.456425	2.886265	3.242659	6.053884	6.229952	4.911266	5.174672	2.87038	4.905253	2.645213	4.099675	5.888497	2.678776	2.479161	2.87184	5.910732	6.127089
GSM1523962	604	1	3.842749	2.94436	2.261707	2.665517	5.265723	5.634177	3.465944	5.626019	3.896011	2.70561	1.736026	2.297119	8.217402	1.930559	2.403597	6.538978	6.092433	3.856959	4.786707	2.56058	4.404597	3.908187	5.35053	6.460932	3.143127	2.562879	3.221059	4.318186	4.888379
GSM1523963	1373	1	2.833816	2.396739	3.31928	2.665517	5.119365	5.403505	4.688356	4.126753	2.991091	2.791911	2.574566	2.823879	7.088142	2.231689	2.796576	5.384292	5.518588	3.991204	4.536034	2.677056	4.74216	2.531335	5.385136	6.980509	2.885038	3.186227	3.128891	4.786268	5.236493
GSM1523964	2956	0	2.88312	2.325047	3.359403	2.663227	5.557088	4.26093	4.759135	3.775922	3.5583	2.764141	3.867064	2.55539	6.494972	3.081382	2.638103	5.176772	5.983448	4.881735	5.431504	2.550322	5.214403	2.821117	3.608908	6.213667	2.410276	3.188652	2.513148	5.648977	5.731458
GSM1523965	344	1	2.629621	2.954206	2.908125	2.554772	5.066095	5.32349	4.220028	7.013317	4.699628	2.695248	2.866551	2.545018	8.990451	3.039169	3.050386	7.124609	6.19016	3.922988	4.466941	2.847403	4.637515	2.882727	4.038408	6.84037	2.539673	3.620998	2.780369	4.901893	5.284927
GSM1523966	1554	1	2.755335	2.632347	3.085434	2.629896	4.414424	4.840615	4.675164	5.276372	2.803552	2.876744	2.487121	2.55495	8.231066	2.794065	3.287772	5.638743	6.343441	4.685626	6.150924	2.657433	5.174976	2.85573	3.864028	7.081426	2.520113	2.969382	2.641134	5.339668	5.634468
GSM1523967	2954	0	2.969303	2.325047	3.128326	2.761647	5.837762	4.85202	4.287522	4.485445	3.581306	2.519738	3.162297	2.542823	7.957898	3.261322	3.053777	6.241709	5.438891	4.340794	4.592471	2.590798	4.583179	2.909072	6.194812	6.614676	2.756185	2.519201	2.652727	5.103903	5.878784
GSM1523968	1355	1	3.867113	2.910813	3.132371	2.461303	4.661984	6.801091	3.460447	5.300067	3.13086	2.685539	2.847756	2.500183	8.427515	2.815162	2.530332	6.428476	7.068226	2.500027	4.619235	2.70481	4.479264	3.71866	5.88386	6.772066	3.714171	2.628523	3.608503	4.801329	4.990915
GSM1523969	537	1	3.547527	2.798665	2.95298	2.651641	5.845772	4.587807	4.054543	4.493003	3.454312	2.789887	2.794126	2.783474	7.366515	3.816682	2.814627	6.102182	5.876225	3.957159	5.118095	2.692002	5.237352	3.307053	5.36708	6.885647	3.143899	2.364345	2.716438	4.426876	4.995237
GSM1523970	471	1	3.032347	2.492456	3.476774	2.489346	5.471866	4.302635	4.100988	4.85121	4.123354	2.710683	2.690146	2.679933	7.64822	4.365261	2.755101	5.093239	6.205034	3.99676	4.382248	2.641176	4.438586	3.219542	5.086024	6.84037	2.588534	2.904318	4.10165	3.015135	5.550128
GSM1523971	399	1	3.132342	2.465873	3.24209	2.78707	5.703845	5.203308	4.433435	5.61035	3.424749	2.739713	3.839957	2.767115	8.025821	2.958004	2.930944	6.271073	6.596635	3.548192	4.25939	2.948468	4.695364	3.237699	5.554173	6.679163	3.371709	2.72962	2.795555	4.921528	5.028478
GSM1523972	195	1	2.478694	2.741489	3.168804	2.603635	4.904744	5.503046	5.012037	4.469207	4.908678	2.835772	2.382938	2.881348	8.076805	2.778161	2.56162	7.386519	6.258564	3.689974	3.989727	2.604959	5.205811	3.166977	4.431254	7.522644	2.738118	2.442363	3.294055	4.992031	5.442136
GSM1523973	2618	0	2.928552	2.656796	3.804681	2.550417	4.693604	4.447506	4.183546	4.829313	3.215255	2.801114	3.18882	2.4536	7.174567	4.328651	3.359379	5.227341	6.434102	4.576665	6.420858	2.58642	4.717309	2.388603	4.90586	6.22909	2.333465	3.078618	2.686448	5.28505	6.301431
GSM1523974	2947	0	2.599279	2.725834	2.719139	2.710399	4.210938	6.12037	4.955014	5.211357	3.943925	2.808416	3.131633	2.309679	8.012272	1.798161	2.862372	5.161006	6.869905	4.31505	5.212794	2.523756	4.872897	2.996379	3.16091	6.342899	2.640061	2.902902	2.924964	4.663671	5.943593
GSM1523975	216	1	2.449903	2.669943	2.325549	2.68929	5.029621	4.6823	4.729709	5.448971	3.333468	2.726459	2.624658	2.699949	7.908594	3.68308	2.572207	6.081391	6.394889	4.330724	4.745505	2.569098	4.214524	3.307436	4.295901	6.375167	3.449459	2.992879	3.186567	5.65905	5.206878
GSM1523976	1680	1	3.100102	2.472298	3.245258	2.735753	4.72092	5.837249	4.177099	4.352395	3.063936	2.792923	3.56334	2.455314	7.763245	3.274319	3.170598	5.722564	6.059833	4.346671	5.107035	2.742824	4.479264	3.377385	5.30134	8.330827	2.577247	2.5814	2.926787	5.368139	6.23029
GSM1523977	30	1	2.818532	2.790222	2.777318	2.826095	5.011722	4.206427	3.739273	5.295325	4.973944	2.999929	2.506936	2.592841	8.643155	1.468166	2.724838	6.316141	6.337436	4.378522	4.097239	2.556137	4.271094	2.651194	5.195358	7.829192	2.660463	2.75836	4.536942	4.136808	5.147703
GSM1523978	487	1	2.623122	2.616186	3.33744	2.436451	5.70458	6.447447	4.214844	5.044714	3.608031	2.68306	3.32538	2.53214	6.981245	3.810264	3.356142	5.639238	7.308829	3.576568	4.951068	2.399803	4.430712	2.89296	4.838881	6.78691	3.096101	3.581205	2.688141	5.153597	5.664754
GSM1523979	283	1	2.475006	2.468755	3.729046	2.559639	5.143196	3.681074	3.577824	4.939308	2.971475	2.658137	2.853035	2.763634	6.586708	5.07864	2.622563	5.853094	6.021798	4.858271	6.222847	2.363156	4.390431	2.680086	2.692624	6.133572	2.850062	2.923674	3.185306	6.264179	6.038318
GSM1523980	201	1	2.891595	2.743788	2.843079	2.670291	5.636714	4.938923	4.184865	4.260369	4.446124	2.636275	3.18697	2.618765	7.748046	3.355734	3.352437	6.652985	5.744416	4.066934	4.239278	2.653397	4.177687	3.021513	4.563046	6.534117	2.705143	2.516028	2.79453	4.863065	5.8678
GSM1523981	2916	0	2.7705784	2.6465192	2.8897529	2.6462093	5.3318202	6.119197	4.7408137	5.8876411	4.5504487	2.6585302	2.7020436	2.4014106	9.047231	3.1793194	2.399243	7.4707199	5.6498787	3.9422777	4.4660096	2.5274157	4.111206	3.2613734	4.1317171	6.6295947	2.3980627	3.2354849	2.6711376	4.9722636	4.872253
GSM1523982	261	1	2.5228772	2.7212354	2.6944185	2.9023372	5.205769	6.0808679	4.6425615	5.9637902	4.0649758	2.6480975	2.585058	2.5950534	9.1211028	2.9473073	2.6064937	7.5097203	5.8526618	2.870593	3.8952617	2.7963324	3.8543477	3.4533826	3.3627727	7.0757658	2.8922654	3.1416495	2.6143508	5.131148	5.0071315
GSM1523983	303	1	2.571887	2.387986	3.189848	2.824499	5.441517	5.808293	3.557773	4.125562	3.468609	2.902204	1.907905	2.542823	7.075941	1.987128	2.920616	6.545997	5.788587	4.376988	5.205704	2.560132	4.943915	2.600946	5.567034	6.935288	3.069954	3.285044	3.615305	5.097017	5.726047
GSM1523984	2909	0	2.877859	3.0364962	2.9192061	2.5216593	5.4777757	5.4218937	4.2345781	4.2239724	3.6850997	4.4346892	1.6860091	2.6406639	7.4209953	4.29405	2.5416504	6.6094198	6.2753115	4.6059589	4.4770382	2.540753	4.1708197	2.7861545	2.2655592	5.4487846	2.5256366	2.8019863	4.2513133	4.237798	6.6433865
GSM1523985	2326	1	2.6430255	2.9488569	3.9443102	2.7540629	5.7066769	5.0967279	4.106832	6.3280613	4.0556072	2.6192338	3.2661279	2.4570664	8.3038234	3.3015049	3.442464	6.0988916	5.8280863	4.4550615	4.3017441	2.5520925	4.7001505	2.8519255	3.3936996	6.6534752	3.1098214	3.4307373	2.5615296	5.7234863	5.8204588
GSM1523986	2604	0	3.237041	2.512222	2.767529	2.630183	5.543403	4.62173	5.01469	5.479416	3.662013	2.699354	3.362737	2.543707	7.90157	3.899367	3.426322	6.078199	5.403853	4.00203	4.862092	2.545326	5.188946	2.825192	5.950716	7.045538	2.840216	3.387129	2.685553	5.395584	5.396634
GSM1523987	548	1	3.088176	2.673042	3.451092	2.57017	5.759104	4.935545	4.828852	3.984881	3.494973	2.661787	3.164906	2.359089	7.223704	2.724287	2.804351	5.649428	5.473632	4.540694	4.425219	2.676457	4.494856	2.83595	5.417039	6.367959	2.256194	2.758042	2.88754	4.799413	5.765891
GSM1523988	445	1	3.524723	3.174567	2.357177	2.562848	5.07663	5.858154	3.840984	5.288424	3.553041	2.775808	2.363372	3.590859	8.905649	2.952872	2.5137	7.209961	7.459695	2.154834	5.276672	2.750045	5.02698	4.102347	6.214529	6.356741	5.767441	3.104051	4.24159	4.906399	4.643593
GSM1523989	2601	0	3.094792	2.802219	2.657367	2.601199	4.748495	4.835802	4.603477	6.18272	4.234263	2.670535	2.771421	2.557592	8.530775	3.757076	2.793044	6.376926	6.198205	4.260882	4.574385	2.444608	4.369658	2.737398	6.0697	7.200042	2.663033	2.609712	3.004245	4.857936	5.488267
GSM1523990	425	1	2.789349	2.910449	3.052722	2.855435	4.765247	5.682023	4.111243	5.423083	3.742897	2.762524	3.456615	2.913937	8.12238	2.445109	3.067015	6.603006	6.161229	3.483202	4.400845	2.76576	3.853206	3.29011	6.424136	7.358982	2.502014	2.296997	2.632715	4.905259	5.797992
GSM1523991	2856	0	2.653111	2.605539	3.034076	2.566832	4.083405	4.891459	5.138587	4.628452	3.937487	2.701607	2.072356	2.483606	7.881992	2.002446	3.207819	6.440872	6.101471	3.837997	4.771911	2.715124	4.111206	3.437316	3.898276	7.001043	5.255768	3.343602	2.949381	4.305478	4.969985
GSM1523992	604	1	3.188737	2.841444	3.277277	2.745959	5.203785	4.679025	4.256581	4.797352	3.508568	2.663626	3.525961	2.990421	6.533776	2.936575	2.511845	5.057099	5.58222	4.347077	5.064495	2.681756	4.765997	2.706063	5.247098	6.65148	2.532564	3.158877	2.643777	4.985688	4.874078
GSM1523993	2044	1	2.976431	2.603023	2.78384	2.543159	4.804487	6.874547	4.37802	4.932647	3.361134	2.709836	2.422629	2.456644	7.808083	1.818533	3.136171	5.904124	5.890842	4.248066	5.238888	2.654953	4.146211	2.869867	4.902622	6.377668	3.104939	3.106966	3.100613	5.831759	5.833376
GSM1523994	2591	0	3.56249	2.618118	3.313583	2.604079	5.902942	5.00406	4.59188	4.771671	3.122928	2.428043	3.586555	2.545018	7.341091	5.047986	2.99497	6.171821	5.340873	3.895066	5.23313	2.497819	5.174976	2.833069	4.951133	7.343975	3.04992	2.620643	2.543076	5.148762	5.209384
GSM1523995	191	1	2.595191	2.674351	2.82608	2.613973	4.357388	6.833062	3.991944	3.674426	3.941636	2.848327	3.260125	2.386322	7.846628	2.792825	2.688423	6.805982	6.058109	4.602069	4.6537	2.65155	4.768363	2.978073	4.17923	6.436152	2.963177	3.085558	3.1301	4.873917	5.48562
GSM1523996	1056	1	3.023867	2.419012	3.161467	2.657145	5.906514	5.26634	5.195454	5.155944	3.850559	2.700185	2.731637	3.029351	7.959258	2.825091	3.505802	5.982263	5.531334	3.77706	5.042598	2.894891	4.331812	2.761189	6.644086	6.710941	3.133433	3.636423	2.705689	5.153184	4.921026
GSM1523997	756	1	2.566936	2.61762	3.311077	2.714416	4.685251	4.04466	4.00037	6.255062	3.386252	2.66748	2.749015	3.064269	7.316848	3.072405	3.568229	6.868583	5.537226	4.731156	6.006482	2.830509	4.020982	2.997525	2.922597	7.08923	4.652267	3.154108	2.411495	5.459922	6.180995
GSM1523998	637	1	2.733047	2.399341	3.794968	2.639871	4.870186	4.328251	4.083809	4.644627	3.679726	2.781035	3.696282	2.795447	7.818713	4.36126	2.873992	5.290741	6.714237	4.430853	3.665383	2.463931	5.907002	2.669015	4.675764	7.188884	2.480753	2.88738	2.850892	5.019672	5.469755
GSM1523999	2816	0	2.556479	2.541505	2.859708	2.538053	6.21605	4.437071	4.636158	4.101379	4.069875	2.679569	3.211012	2.70703	7.397501	3.308967	3.221558	3.894206	5.62622	4.494877	4.84831	2.62403	5.356021	2.404188	4.103511	5.76779	2.589858	3.563494	2.787138	4.630825	5.703291
GSM1524000	2816	0	3.13878	2.73415	2.700002	2.582342	5.32193	5.931428	4.207045	5.283301	3.512773	2.77943	2.853973	2.784867	7.099596	3.063237	3.128319	6.184773	5.389597	4.733476	5.011323	2.724999	4.019752	2.639297	5.113338	5.946389	2.73555	3.659852	2.737863	5.096193	5.414932
GSM1524001	2809	0	2.733649	2.727028	2.770081	2.611609	5.680665	4.393483	4.192791	4.199623	3.761019	2.790312	3.122833	2.908201	7.868209	2.580779	2.83378	5.074925	6.062732	4.655243	3.018406	2.660862	4.891523	2.794229	4.567349	7.389735	2.757874	3.686576	2.755348	5.312474	5.361127
GSM1524002	2584	0	2.498335	2.627869	3.189848	2.767559	5.497518	3.850038	4.880898	3.901937	3.225	2.763749	3.700926	2.642369	6.723088	4.767096	3.638528	4.650933	5.57416	4.519086	4.908011	2.530691	5.429542	2.933942	2.746636	6.1737	2.449682	3.130492	2.589426	6.245536	6.255801
GSM1524003	2578	0	2.739136	2.609529	3.566654	2.717075	5.691969	4.271083	5.168437	3.993472	3.010537	2.736867	3.452021	2.479607	5.826416	4.488842	3.452751	5.582556	5.735582	4.347454	6.216905	2.631095	5.992743	2.60889	5.23967	6.190415	2.558182	2.915776	2.812826	5.045666	6.064781
GSM1524004	178	1	3.408599	2.43583	3.958139	2.591919	5.576689	4.343609	4.635569	4.831459	3.700219	2.674657	3.865279	2.681729	7.40948	2.092027	3.310177	6.336574	6.16487	4.382121	4.576297	2.874924	4.656882	2.832361	4.933267	6.689737	2.479403	2.846733	2.689851	5.396765	5.827903
GSM1524005	284	1	2.856963	2.506407	3.066891	2.659862	5.892169	4.689141	4.51634	7.374392	3.03872	4.756738	2.838325	2.897751	7.695755	2.137889	3.044994	6.874428	5.811732	5.131578	4.582309	2.81361	4.507015	2.827303	4.470454	6.988018	2.791672	3.080433	2.86688	4.809332	6.088293
GSM1524006	788	1	3.673685	2.859302	2.944345	2.69107	4.566021	6.238266	3.565794	4.900964	3.606191	2.799488	1.94555	2.513869	8.274386	3.239548	2.398223	6.415423	6.987907	1.397995	4.807928	2.766815	4.300432	5.086445	6.138458	6.178279	4.264797	2.536497	3.390169	4.407404	4.360218
GSM1524007	311	1	2.810566	2.546126	2.659936	2.632116	5.151701	4.091383	3.999761	7.416602	3.713764	3.120623	2.410308	2.394695	8.143539	2.290387	2.963791	5.56722	6.358919	4.503856	4.350736	2.540298	3.687257	2.843319	4.428752	6.732393	2.641373	2.717099	2.97618	4.614519	6.178803
GSM1524008	325	1	2.585255	2.593953	3.539145	2.61545	4.957216	5.526626	4.532323	5.423971	3.30703	2.717927	3.204773	2.492202	7.570167	4.319886	3.14717	4.57433	7.132209	4.48957	4.646236	2.588228	5.346753	2.68467	2.870201	6.947807	2.996212	2.714657	2.648442	5.849548	5.995486
GSM1524009	1950	1	2.846327	2.860765	2.963615	2.721093	5.426384	4.817057	4.364555	5.260379	4.207918	2.718536	3.288714	2.461887	8.068846	3.493738	3.260578	6.718169	6.022321	3.88949	4.803551	2.730808	4.792894	2.839699	4.828514	6.875178	3.123857	2.85974	2.794009	5.071019	5.322749
GSM1524010	591	1	3.510565	2.54389	2.655778	2.629299	5.471261	4.727245	3.588664	4.644627	3.322441	2.621211	2.449654	3.913683	7.277172	3.399995	2.782725	6.489267	6.546912	4.016669	5.328943	2.666804	4.67728	2.996753	5.590626	6.465247	3.132309	2.825235	3.257214	4.558731	5.172553
GSM1524011	2706	0	3.055896	2.494971	3.472105	2.568152	6.206534	4.105296	4.036186	3.81139	3.663899	2.732438	3.241007	2.488759	7.070448	3.556484	3.69466	6.46434	5.979412	4.47313	4.789115	2.677786	5.122618	2.893336	5.142711	6.060666	2.382792	3.128663	3.400072	4.373877	6.21479
GSM1524012	2557	0	2.700348	2.415604	3.230129	2.648235	5.219621	4.732117	3.968051	3.906435	3.040534	2.641324	3.695413	2.719107	7.566744	3.71165	3.58079	7.36271	6.713485	4.620499	4.32072	2.725292	4.610967	2.587519	3.012731	7.451683	2.841814	3.480663	2.520001	4.470352	6.096933
GSM1524013	2697	0	2.522653	2.341645	3.362567	2.475886	5.073426	5.306675	4.823781	5.085735	3.456623	2.650135	3.117245	2.599197	7.774498	4.433242	3.22736	6.52122	6.11354	4.897428	4.771101	2.512084	5.550704	2.527568	2.907761	7.34038	2.85358	2.845382	4.590141	5.453761	5.953341
GSM1524014	340	1	3.064093	2.741097	3.484075	2.510872	5.634102	6.673696	5.40735	4.954315	3.973771	2.918508	3.248261	2.507712	7.672656	2.965358	3.25666	5.403978	6.153845	4.411819	5.857707	2.757408	4.795177	2.960349	4.16368	6.342038	3.047477	2.515005	2.791489	5.186395	6.059643
GSM1524015	746	1	2.582147	2.662854	2.793416	2.558486	5.280381	4.941511	3.704146	6.856767	3.169208	5.453218	2.809818	2.423495	9.118195	3.650526	2.770619	6.15224	5.89357	4.011117	4.68298	2.46768	4.26136	2.512939	5.325374	7.109207	2.850062	2.876553	3.555208	4.107521	4.47183
GSM1524016	834	1	2.90843	2.718089	3.110393	2.582043	5.814314	5.625471	4.770744	4.884255	3.83787	2.714518	3.343525	2.590278	7.720464	3.592907	3.32335	6.48419	5.566521	4.580064	3.856953	2.714128	4.481118	2.657684	4.891834	6.234922	2.439981	2.584217	3.548595	5.222774	5.47661
GSM1524017	2551	0	2.647022	2.373594	3.159149	2.575547	5.679329	4.069866	4.538131	3.988592	3.111939	2.692253	3.483048	2.408325	7.379059	4.335289	3.576199	5.940864	5.440289	5.506384	5.181996	2.705108	4.39972	2.681272	4.48996	6.961611	2.616579	3.056553	2.729437	5.561902	5.893424
GSM1524018	2543	0	3.129494	2.523553	3.307819	2.578114	5.228244	6.164799	4.839859	4.347367	3.253543	2.81532	3.320011	2.573883	6.611335	4.696581	3.470989	5.345037	5.733091	5.001906	4.490322	2.41447	4.146211	2.760489	4.844665	6.072831	2.191709	3.203778	2.994359	5.503912	6.259546
GSM1524019	250	1	3.43277	2.71033	2.71914	2.631016	5.372711	5.127649	4.23513	5.521581	4.585659	2.667282	2.12709	2.798956	8.283305	3.310187	3.005308	6.790164	5.57416	5.320606	5.366553	2.683289	4.797672	2.717299	5.322435	6.703282	2.900237	3.394326	3.003227	5.116061	6.115462
GSM1524020	2529	0	3.25232	2.591815	2.775033	2.72329	5.590642	5.077367	3.939974	4.863256	3.728789	2.617609	3.411331	2.600063	7.725314	3.098167	3.208313	5.896981	6.120184	4.677211	5.127219	2.610812	5.052316	2.627534	5.092979	7.02921	2.86685	3.099133	2.69148	5.020874	5.221371
GSM1524021	388	1	3.100765	2.756008	2.38896	2.405945	5.631535	5.376348	4.576097	5.501801	3.965284	2.64152	2.633611	2.667894	8.333725	3.290182	2.99497	6.76482	6.24308	4.58143	4.485733	2.733774	4.420371	2.787986	4.600907	7.728364	2.817399	3.133715	2.767582	4.988833	5.347001
GSM1524022	241	1	3.635806	2.803755	2.727671	2.582953	5.35808	5.226186	4.432741	5.031868	3.271813	2.692459	2.412974	2.798046	8.00069	1.964005	3.522244	6.2608	6.784255	4.138569	4.894878	2.656861	4.536995	4.869765	4.827428	6.648509	3.362273	3.048006	3.305669	5.526054	5.445471
GSM1524023	2515	0	2.593521	3.002112	3.539912	2.700088	5.362535	4.390072	3.98379	4.748204	2.622228	2.578174	3.649147	2.842934	7.975356	3.715401	4.291525	6.115395	6.618105	4.068256	5.086216	2.792059	4.399042	3.159799	3.060921	7.290654	2.872863	2.684249	2.591894	5.719337	6.06988
GSM1524024	2683	1	3.038025	2.792616	3.406069	2.730399	4.567383	5.112904	4.721256	5.300962	4.044671	2.858526	2.493474	2.349402	7.923638	3.0787	3.187877	6.055758	6.090836	4.066279	5.574311	2.442083	4.688812	2.613632	4.918489	6.211333	2.815829	2.883208	2.957368	4.801329	5.350803
GSM1524025	2455	1	2.906253	2.688435	3.630855	2.593516	5.440263	4.387896	4.210271	4.163132	3.03206	2.583665	3.21379	2.633149	7.422969	3.223437	2.806755	5.957017	6.771869	4.261252	4.935316	2.561619	5.475705	3.428398	2.885036	6.963753	2.842631	3.245792	2.696208	5.819678	5.363649
GSM1524026	2508	0	2.701616	2.633282	2.895361	2.548859	5.403683	6.779714	4.084513	5.616893	3.968643	2.661365	2.633611	2.495759	8.631387	3.594248	2.611302	6.409768	6.16487	3.287991	4.862621	2.501962	4.820771	2.777522	5.013439	6.308868	2.582665	3.240815	2.934122	4.801329	4.923507
GSM1524027	1791	1	2.729493	2.643285	3.209156	2.579735	5.946176	4.970604	3.831349	4.896086	3.696978	2.654745	3.053547	2.49174	7.503067	3.976047	3.19814	4.839477	5.581274	4.735313	3.25783	2.611085	4.357419	2.469538	5.041056	7.201261	2.669297	3.363031	2.737735	5.508313	5.660135
GSM1524028	1431	1	2.958171	2.565217	3.054431	2.779019	4.718401	5.372959	4.045449	4.856861	3.435586	3.347307	2.569233	2.38936	7.919473	4.157955	3.512628	6.451732	6.038986	4.153839	4.54016	2.574582	3.649199	2.603044	4.699035	6.626666	2.875739	2.336593	4.798778	4.670469	5.690475
GSM1524029	933	1	3.399189	2.568386	3.155073	2.550274	6.060549	6.783127	4.326064	5.55853	3.742377	2.667898	2.931898	2.582612	8.445536	3.316476	3.593649	5.970096	6.764902	2.663971	5.030175	2.958649	5.12438	3.906633	6.414332	7.416683	3.006438	3.021966	2.933275	4.063407	4.919221
GSM1524030	940	1	4.574286	2.833803	2.555597	2.728539	4.896427	5.910261	3.484381	5.474625	3.259946	2.728699	1.779722	3.078722	8.252046	2.466153	2.828022	6.371383	7.610622	1.783256	5.120591	2.687757	4.436777	4.43195	6.401053	6.64184	4.953287	2.848186	3.8273	4.133962	4.850282
GSM1524031	2460	0	2.571887	2.548424	4.167201	2.444254	5.976456	4.088587	4.68767	4.824176	3.654675	2.763944	3.649147	2.703889	7.85345	3.963141	3.645157	5.363802	7.053201	5.562904	5.147375	2.550753	4.695955	3.049255	3.812354	7.227558	2.902298	2.872964	2.551328	5.151176	5.669316
GSM1524032	2316	1	2.543259	2.338063	2.743631	2.773346	5.636054	5.424552	4.326064	4.581204	3.318312	2.852273	3.785233	2.947101	7.924879	3.340837	3.312647	6.860037	5.531799	4.737143	4.78047	2.861777	4.70015	3.218806	2.839097	6.709018	2.658731	3.294195	2.540475	4.958087	5.888551
GSM1524033	2425	0	2.794474	2.824492	3.694818	2.736323	6.041955	5.673764	4.1158	5.532955	4.304666	2.711688	3.048948	2.604604	8.453504	3.190722	3.164668	5.421311	5.167557	5.921448	4.27247	2.563693	5.995952	2.862242	6.26421	6.647608	2.717346	3.018014	2.69148	6.444039	6.304435
GSM1524034	1322	1	3.317033	2.470239	2.867514	2.660622	5.86307	4.895648	4.659826	4.411405	4.096709	2.658913	2.650707	2.702169	7.339036	2.701632	2.535752	5.09136	5.816988	3.986018	4.927647	2.657719	4.114885	3.285222	5.643809	6.892857	2.42723	2.991766	2.582161	4.815185	5.649711
GSM1524035	2409	0	3.2887	2.584685	2.916858	2.682391	5.485742	4.819587	4.668764	4.885515	3.730121	2.682398	2.842442	3.004701	8.281549	3.417104	3.074722	6.35866	6.275312	3.849624	4.393815	2.860687	4.517965	3.555468	5.743096	6.704215	3.037259	3.327031	3.255217	5.348426	5.082504
GSM1524036	2398	0	2.590557	2.508371	3.525839	2.608064	6.159852	5.817784	4.562536	5.014458	4.042309	2.619234	2.529019	2.785762	7.903116	3.098167	3.91845	5.84857	5.384778	4.77594	5.273942	2.596973	5.45765	2.59406	4.513324	6.798739	3.02248	2.889777	2.64657	4.84672	5.960922
GSM1524037	703	1	3.101691	2.821833	2.669531	2.772424	5.790198	4.699746	4.683045	4.44547	4.13974	2.684323	3.128974	2.434495	8.212117	4.349494	2.988956	6.644581	6.047096	3.417498	4.538502	2.674983	4.547224	2.910624	5.126637	6.954181	2.890295	2.621031	2.575293	4.909198	5.309876
GSM1524038	259	1	2.563133	2.502223	3.39477	2.760302	5.299123	4.683867	4.459152	6.188573	4.473876	2.691873	4.096893	2.80641	8.257126	5.00485	2.913232	6.575928	5.656665	4.288886	4.216708	2.544581	4.786102	2.815115	4.796716	7.312189	2.861663	2.926202	2.717209	5.238281	5.693846
GSM1524039	362	1	2.341916	2.802945	2.660767	2.672917	5.490906	5.139519	4.424461	5.856148	4.049239	2.856223	2.981177	2.616522	8.981725	3.211846	2.464652	7.320282	5.512072	4.171155	3.622518	2.826042	4.240846	4.023797	4.260543	6.926758	2.860421	3.054004	2.679686	5.026711	5.552192
GSM1524040	1085	1	2.742117	2.432585	3.287798	2.649283	4.981175	4.661291	4.597761	3.975185	2.916754	2.770768	2.171889	2.560616	6.495641	4.370381	3.20483	5.962358	5.338725	4.166571	5.371604	2.418908	4.351589	2.63605	4.843236	6.23413	2.565582	3.186227	4.223146	4.961584	5.510352
GSM1524041	2320	0	2.559662	2.393194	3.307819	2.675882	5.60779	4.667691	4.299018	4.339343	3.124306	2.717519	3.459284	2.450151	7.508817	4.687606	3.227821	6.403992	5.136036	5.480947	4.983305	2.54015	4.544731	3.028357	3.211148	6.477791	3.229515	2.943095	2.566084	5.549429	6.049632
GSM1524042	325	1	2.421899	2.939899	3.257902	2.709364	4.477931	5.086	4.735658	6.049448	4.7881	2.760023	2.554149	2.502372	9.193259	4.343048	2.982634	6.999137	6.019035	3.751685	3.846297	2.528757	4.628447	2.696061	5.310222	8.145023	2.588534	2.57828	2.794936	5.156916	5.481637
GSM1524043	505	1	2.682447	2.70731	3.091869	2.836642	5.407007	4.582327	5.248458	4.957448	4.094376	2.94655	3.043333	2.812761	7.040373	2.682647	3.343542	5.402611	5.289012	4.784226	5.063381	2.648944	5.247701	2.92501	4.19047	6.06585	2.854427	3.286507	2.387884	6.230082	6.245745
GSM1524044	686	1	3.102347	2.801461	2.43526	2.666256	4.902223	5.536905	3.971817	5.496035	4.475263	2.739497	1.79966	2.242478	8.491509	3.472074	2.984091	6.487556	6.124526	4.142606	6.113398	2.498607	4.534066	2.945344	5.415507	6.770089	2.79488	2.82414	2.727926	5.041686	5.595207
GSM1524045	2674	0	2.4195	2.799469	3.131576	2.455537	4.71644	5.924788	4.916875	3.988592	4.116752	2.598481	2.663015	2.249928	7.200695	2.350765	3.23227	6.112732	5.850582	3.807407	4.649445	2.837506	4.628447	2.977318	5.020405	7.068357	2.675538	2.880071	2.801276	4.567894	6.291015
GSM1524046	2641	0	3.503607	2.699476	2.696047	2.453601	5.279011	4.794447	4.380488	4.655504	3.883013	2.77057	3.262679	2.661937	7.858625	2.109961	2.594655	6.254226	5.919126	4.355606	5.447025	2.458362	4.295092	2.5988	5.050579	6.572485	2.973328	2.684975	2.815396	5.155197	5.951896
GSM1524047	2096	0	2.785373	2.605539	3.167044	2.784866	5.638512	5.580387	4.806797	3.981303	3.534808	2.655357	3.232981	2.803265	7.490733	3.621121	3.072364	4.990015	5.708001	4.302803	4.938252	2.636122	5.290093	3.056846	5.798512	6.922496	2.692892	2.818083	2.642322	4.892551	5.256015
GSM1524048	1404	1	2.53721	2.657226	3.075978	2.758199	5.010407	4.738495	5.035159	4.381869	3.443737	2.730175	2.43953	2.44844	7.758109	5.102773	3.109934	6.698636	5.626694	4.859834	4.688802	2.663876	4.093728	3.035178	2.838406	6.810642	2.682206	2.941693	2.899722	4.617108	5.869122
GSM1524049	2634	0	2.736351	2.505233	2.996059	2.72079	5.500043	4.913912	5.285372	4.395136	3.997482	2.785266	3.001064	2.683998	8.021206	3.774951	2.991937	7.078478	6.070899	4.431623	5.254043	2.655695	4.711792	3.051464	4.04263	6.622021	2.970091	2.994286	2.504592	5.599096	6.09041
GSM1524050	1714	1	3.291607	2.659097	3.218638	2.455537	5.786202	4.793852	4.306623	4.295792	3.698342	3.243063	3.286886	2.600958	7.254679	5.200109	3.549171	6.166281	5.35076	4.184288	5.069729	2.469785	5.354784	2.981798	4.97901	7.66184	2.622019	3.125783	3.712658	5.207682	6.034689
GSM1524051	2618	0	2.950946	2.713332	2.82454	2.735453	5.821618	4.824493	4.119024	4.17553	3.335788	2.694091	2.772275	2.281738	7.620555	4.185194	2.724838	6.385676	5.351582	4.529511	5.065847	2.545958	4.964399	2.582011	4.564863	6.744742	2.820268	2.848933	2.622604	5.871835	5.863584
GSM1524052	395	1	2.5821465	2.7124434	3.0275715	2.7073365	4.8013508	5.9534226	3.9035298	4.9852416	3.1933751	2.717709	2.6937985	2.6275754	7.5983617	3.3686794	2.9210658	6.2169961	6.4819293	3.9722285	5.6610376	2.7468026	4.225898	3.1247105	4.9368104	6.9435479	3.8994161	2.4597836	4.4019269	4.2627624	5.2780476
GSM1524053	2608	0	2.853237	2.465184	3.223535	2.357257	5.182186	5.087696	5.187014	4.823769	3.986552	2.77118	2.927161	2.567715	8.173507	4.111476	3.339253	5.613222	5.19792	4.507026	4.373184	2.713981	5.504778	2.788718	4.667851	6.342038	2.817399	2.880432	3.048832	5.942909	5.689153
GSM1524054	2597	0	2.506705	2.715866	2.530815	2.982371	5.379246	3.932624	4.38603	4.142893	3.111013	2.810827	2.877908	2.299266	6.774424	4.130157	3.165183	5.541823	5.333201	4.786577	6.650718	2.62666	4.448715	2.978851	4.85582	5.68979	2.684927	2.969701	3.334953	5.313264	6.437893
GSM1524055	1138	1	2.552535	2.729563	3.039939	2.676744	5.119365	6.095692	4.32789	7.058543	5.701178	2.839028	2.923754	2.816231	8.93065	3.165233	2.924103	6.485003	5.483687	3.729889	4.329845	2.551212	4.85598	2.883881	4.749081	7.522644	2.821909	3.002726	3.151113	5.173859	5.339768
GSM1524056	425	1	2.433104	2.647819	3.528077	2.691898	4.762626	6.801616	4.409095	4.612735	3.517368	2.432007	2.598005	2.592416	8.576395	4.251461	3.252058	4.660264	6.527067	4.038981	4.678454	2.547025	5.004064	2.695303	5.056641	7.481779	3.073972	3.349269	2.849645	5.230927	5.658156
GSM1524057	478	1	3.025135	2.851025	3.010853	2.570325	5.337232	5.849865	4.215454	5.425943	3.65872	2.760838	2.904315	2.643613	8.700625	2.475958	3.23227	6.659781	7.13002	3.610158	4.270601	2.803311	4.86874	3.88623	6.579759	6.986901	5.695204	2.485162	3.989196	4.181334	4.779503
GSM1524058	2564	0	2.392326	3.102628	3.192992	2.601199	6.250832	5.4453	4.380488	6.311682	3.896443	2.604363	3.061646	2.642762	8.598913	3.443484	2.614149	6.552305	5.814838	4.546053	4.420731	2.61977	5.928181	2.609984	3.384823	6.615586	2.820268	3.035186	2.729573	6.600914	6.170216
GSM1524059	2556	0	2.726712	2.665529	2.90161	2.844666	4.960452	5.811094	4.214261	4.780975	3.610722	2.714716	2.613272	2.599657	8.217402	2.773294	3.077238	7.022866	5.978869	4.439121	5.521128	2.623167	4.499095	3.185677	4.176439	6.692572	3.35909	3.314808	2.928699	4.330435	5.056854
GSM1524060	2545	0	2.572493	2.686285	3.536822	2.532473	4.466913	6.333026	4.880353	5.127722	3.977552	2.659287	2.781893	2.564666	8.318713	3.64015	3.074237	6.3245	6.087944	4.5733	4.446598	2.613766	4.835921	2.844786	4.384103	7.984592	2.728472	3.167102	3.846502	5.315285	5.077645
GSM1524061	2538	0	2.611695	2.358609	3.299002	2.450112	4.846347	4.303136	4.878355	4.021263	3.455685	2.632389	3.284043	2.513869	6.589653	4.804921	3.26276	6.664915	5.678465	5.132806	5.603933	2.435058	5.931294	3.029839	4.145616	6.693581	2.860832	3.585157	2.532007	5.535501	6.101207
GSM1524062	2106	1	3.8491505	2.8695512	2.4337484	2.4875346	5.1795599	6.2452791	3.7629375	5.1765502	3.008708	2.8146758	2.3951682	2.729423	8.1049018	2.3557177	3.051869	6.3642143	7.2816897	1.9593697	4.9788601	2.8521381	4.6405403	3.3875624	6.1681215	6.3864766	4.6423739	2.7727212	3.6468117	4.3177816	5.1508286
GSM1524068	2786	0	2.62775	2.778147	2.786205	2.573652	5.34642	6.20042	3.840361	4.13657	3.280951	2.97278	3.248261	2.900366	7.065042	3.389385	3.025716	4.925317	6.12882	5.368406	5.240774	2.6433	5.6373	2.763341	3.619458	6.385552	2.274295	2.899737	2.386464	5.75455	6.004023
GSM1524069	2568	1	3.111495	2.542672	2.576335	2.781821	5.701208	4.369487	4.850659	3.5774	3.115164	2.795276	2.735991	2.453168	5.362818	2.769493	3.693576	4.671376	5.296455	4.873523	5.303187	2.537763	5.3603	3.057599	4.760005	6.29907	2.893488	3.176563	2.635287	5.324135	6.059643
GSM1524070	2749	0	2.78736	2.612119	2.90401	2.657583	4.577911	6.384332	4.742205	4.067335	3.537125	2.646881	2.064256	2.51874	7.85604	2.753541	2.98314	5.124913	6.381995	3.805285	4.961999	2.759411	4.642896	2.661614	4.745342	7.201261	3.013404	3.15775	2.643381	5.124648	5.569442
GSM1524071	2723	0	2.889421	2.553327	2.778071	2.577077	6.142413	5.631998	4.833416	4.291726	3.593181	2.625003	3.056188	2.636697	6.822928	4.064635	3.420904	5.363802	5.674481	3.961424	4.726829	2.607944	5.496693	3.164765	4.431254	7.415385	2.713633	2.852394	2.508559	5.095809	4.817585
GSM1524072	1288	1	3.471431	2.600967	3.237232	2.682113	5.954675	4.564962	4.66551	5.581694	3.724802	2.673639	2.956431	2.729423	7.237211	3.604411	3.742935	5.228942	5.57416	5.011304	4.829914	2.603881	5.270329	2.830224	4.74689	7.227558	2.774645	2.983417	2.702667	5.025924	5.108603
