# Supplementary material for: Significance of a Tumor Mutation Burden Gene Signature with Prognosis and Immune Feature of Gastric Cancer Patients
Source: Int J Genomics. 2022 Jun 8;2022:7684606. doi: 10.1155/2022/7684606 (PMC9201710; doi:10.1155/2022/7684606)
Supplement: Supplementary 2 — Table 1: result of univariate Cox analysis. Supplementary Table 2: 29 optimal candidates acquired from LASSO regression analysis. Supplementary Table 3: result of multivariate Cox analysis. [file 7684606.f2.zip › Supplementary table 3.txt]

id	coef	HR	HR.95L	HR.95H	pvalue
SPTBN4	-0.262610229	0.769041589	0.537206487	1.100926702	0.151380537
SLCO6A1	0.671930387	1.958013398	1.124827233	3.408360282	0.017506568
NES	0.216554286	1.241790495	1.056343727	1.459793432	0.00868547
CDH6	0.212530176	1.236803435	0.971951043	1.573826939	0.083885592
KCNT1	-0.306647964	0.735909622	0.560575094	0.966084611	0.027212327
ABCB5	0.710289019	2.034579205	1.197100643	3.45794864	0.008670834
EHBP1	0.244128609	1.27650849	0.987359992	1.650334163	0.062476917
LRRCC1	-0.285990393	0.751269833	0.588872773	0.958452128	0.021365783
KCNG4	1.394928157	4.034684699	1.560782947	10.42981707	0.003993303
APLP2	0.222478029	1.249168374	0.963533567	1.619478219	0.093049323
MEFV	-0.396551805	0.67263543	0.466512654	0.969830974	0.033666322
CLGN	0.152420063	1.16464936	0.952423774	1.424164504	0.137534061
RBM15	-0.228707064	0.795561548	0.597025799	1.060118636	0.118430567
